# Supplementary material for: Liver biopsy derived induced pluripotent stem cells provide unlimited supply for the generation of hepatocyte-like cells
Source: PubMed Central journal article supplement (PMC6715171; doi:10.1371/journal.pone.0221762), 2019-08-29

S1 Fig.

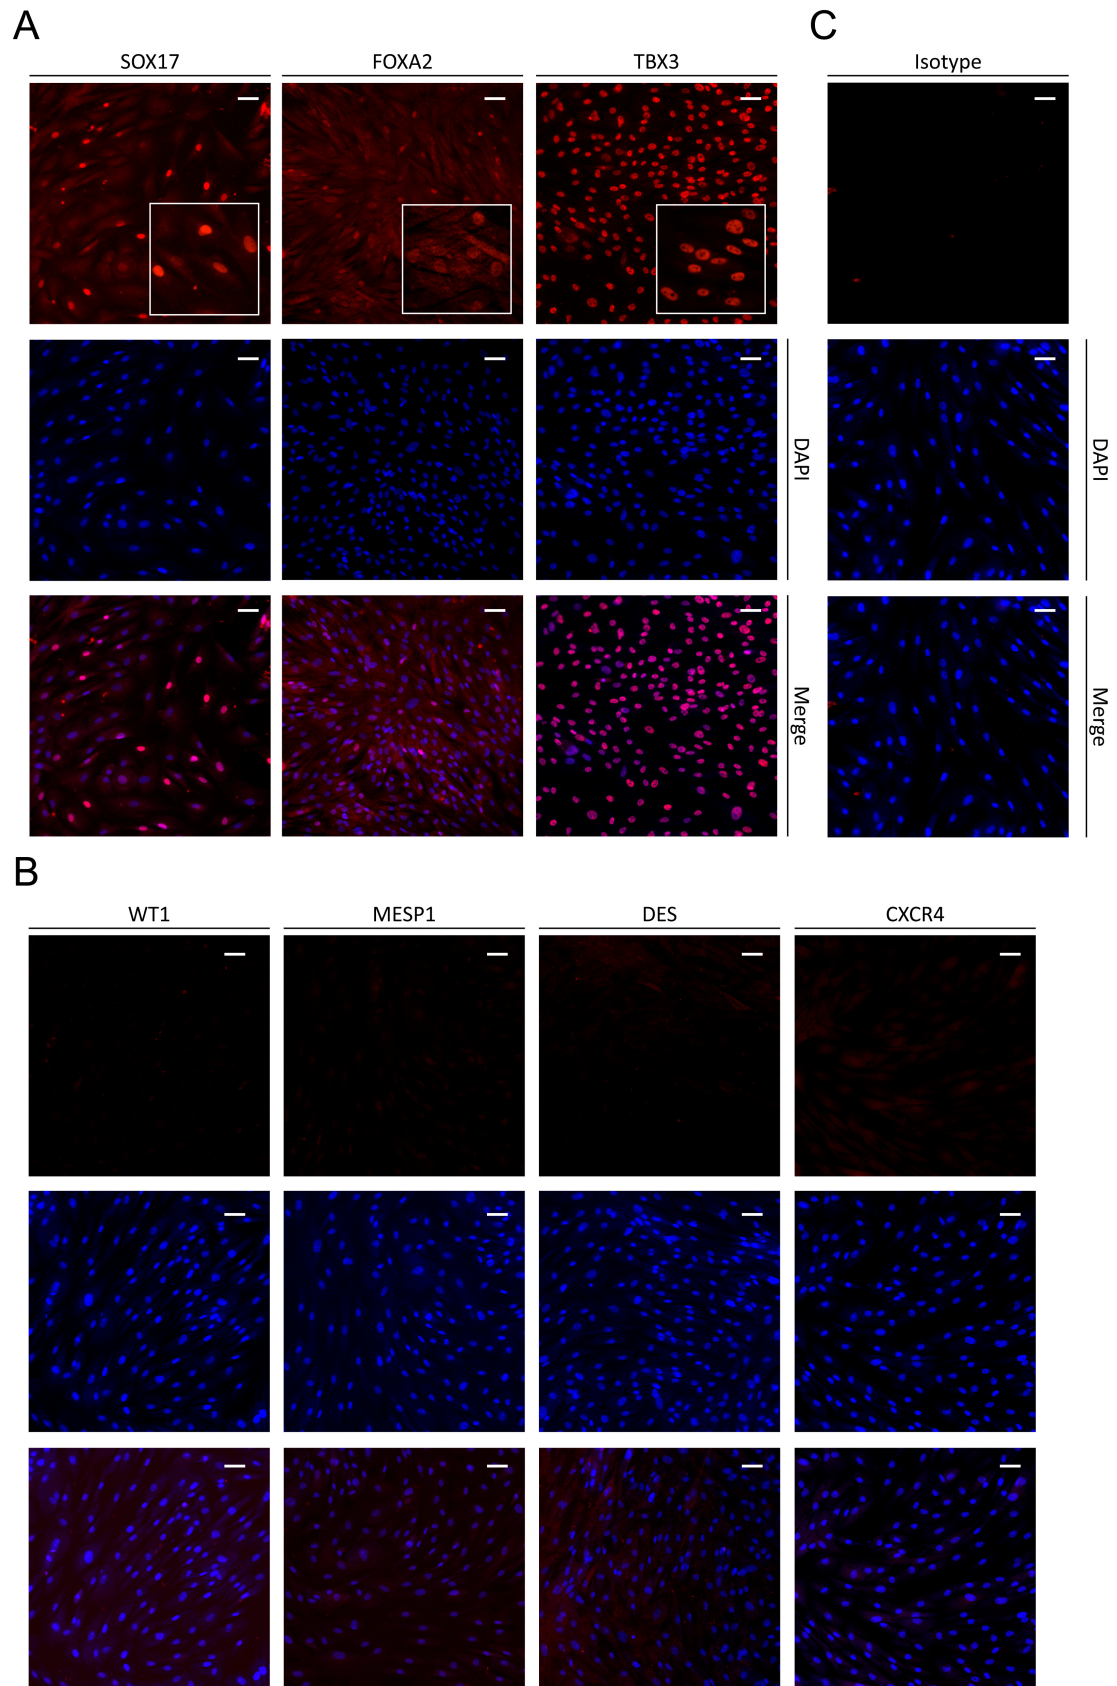

Supplement: pone.0221762.s001.pdf [file pone.0221762.s001.pdf]
