# Supplementary material for: Liver biopsy derived induced pluripotent stem cells provide unlimited supply for the generation of hepatocyte-like cells
Source: PubMed Central journal article supplement (PMC6715171; doi:10.1371/journal.pone.0221762), 2019-08-29
Supplement: pone.0221762.s008.pdf [file pone.0221762.s008.pdf]

**S1 Table.** Patient liver primary cell expansion and iPSC reprogramming

| <b>Biopsy ID</b> | <b>Disease</b>                          | <b>Age at biopsy</b> | <b>hPLCs expansion</b> | <b>Colony formation (# colonies)</b> | <b>Reprogramming efficiency</b> | <b>iPSC maintenance</b> | <b>Reprogramming xenogene free</b> | <b>Note</b>                       |
|------------------|-----------------------------------------|----------------------|------------------------|--------------------------------------|---------------------------------|-------------------------|------------------------------------|-----------------------------------|
| C086a            | Alcoholic liver disease (ALD)           | 79                   | +                      | - (0)                                | NA                              | -                       | -                                  | No emerging colonies              |
| C091             | Autoimmune hepatitis (AIH) in remission | 66                   | +                      | + (1)                                | 0.001%                          | -                       | -                                  | iPSC colony lost before passage 1 |
| C101             | Non-alcoholic liver disease (NAFLD)     | 76                   | +                      | + (65)                               | 0.040%                          | +                       | Yes                                | Ready to use after 20 passages    |
| C496             | Alcoholic liver disease (ALD)           | 32                   | +                      | + (32)                               | 0.019%                          | +                       | Yes                                | Ready to use after 20 passages    |
| C824             | Alcoholic liver disease (ALD)           | 45                   | +                      | - (0)                                | NA                              | -                       | -                                  | No emerging colonies              |
| C876             | Normal liver                            | 37                   | +                      | - (0)                                | NA                              | -                       | -                                  | No emerging colonies              |
| C877             | Alcoholic liver disease (ALD)           | 60                   | +                      | + (24)                               | 0.016%                          | +                       | No                                 | Reprogramming vectors detectable  |
| C885             | Alcoholic liver disease (ALD)           | 51                   | +                      | - (0)                                | NA                              | -                       | -                                  | No emerging colonies              |
