# Supplementary material for: Liver biopsy derived induced pluripotent stem cells provide unlimited supply for the generation of hepatocyte-like cells
Source: PubMed Central journal article supplement (PMC6715171; doi:10.1371/journal.pone.0221762), 2019-08-29
Supplement: pone.0221762.s009.pdf [file pone.0221762.s009.pdf]

**S2 Table.** q-PCR primer list

| <b>Target</b> | <b>Forward primer</b>          | <b>Reverse primer</b>                  | <b>Product</b> |
|---------------|--------------------------------|----------------------------------------|----------------|
| SeV           | GGA TCA CTA GGT GAT ATC GAG C  | ACC AGA CAA GAG TTT AAG AGA TAT GTA TC | 181 bp         |
| SeV-KOS       | ATG CAC CGC TAC GAC GTG AGC GC | ACC TTG ACA ATC CTG ATG TGG            | 528 bp         |
| SeV-Klf4      | TTC CTG CAT GCC AGA GGA GCC C  | AAT GTA TCG AAG GTG CTC AA             | 410 bp         |
| SeV-c-Myc     | TAA CTG ACT AGC AGG CTT GTC G  | TCC ACA TAC AGT CCT GGA TGA TGA TG     | 532 bp         |
