# Supplementary material for: Liver biopsy derived induced pluripotent stem cells provide unlimited supply for the generation of hepatocyte-like cells
Source: PubMed Central journal article supplement (PMC6715171; doi:10.1371/journal.pone.0221762), 2019-08-29
Supplement: pone.0221762.s010.pdf [file pone.0221762.s010.pdf]

**S3 Table.** Gene sets significantly enriched in PLCs vs. Liver

| <b>Gene Set Name</b>                        | <b># Genes<sup>a</sup></b> | <b>% of Gene set<sup>b</sup></b> | <b>p-value</b> | <b>FDR q-value</b> |
|---------------------------------------------|----------------------------|----------------------------------|----------------|--------------------|
| <b>EPITHELIAL TO MESENCHYMAL TRANSITION</b> | 137                        | 69%                              | 8.79E-118      | 4.40E-116          |
| G2M CHECKPOINT                              | 100                        | 50%                              | 5.90E-67       | 1.47E-65           |
| E2F TARGETS                                 | 84                         | 42%                              | 8.93E-49       | 1.49E-47           |
| MITOTIC SPINDLE                             | 82                         | 41%                              | 1.16E-46       | 1.44E-45           |
| UV RESPONSE DOWN                            | 65                         | 45%                              | 2.00E-40       | 2.00E-39           |
| APICAL JUNCTION                             | 72                         | 36%                              | 1.18E-36       | 9.83E-36           |
| HYPOXIA                                     | 71                         | 36%                              | 1.05E-35       | 7.50E-35           |
| TNFA SIGNALING VIA NFKB                     | 67                         | 34%                              | 5.28E-32       | 3.30E-31           |
| GLYCOLYSIS                                  | 65                         | 33%                              | 3.27E-30       | 1.82E-29           |
| MYOGENESIS                                  | 64                         | 32%                              | 2.49E-29       | 1.24E-28           |

- a.** Number of significant genes overlapping with the Molecular Signatures Database (MSigDB) hallmark gene sets
- b.** Percentage of the hallmark gene set represented by the genes in overlap
