# Supplementary material for: Liver biopsy derived induced pluripotent stem cells provide unlimited supply for the generation of hepatocyte-like cells
Source: PubMed Central journal article supplement (PMC6715171; doi:10.1371/journal.pone.0221762), 2019-08-29
Supplement: pone.0221762.s011.pdf [file pone.0221762.s011.pdf]

**S4 Table.** Summary of samples included in the RNAseq experiment for transcriptomic profiling (numbers indicate the number of replicates processed).

|                        | Source  |      |                                             |                   |          |
|------------------------|---------|------|---------------------------------------------|-------------------|----------|
|                        | Patient |      | Sullivan<br>G.J. <i>et al.</i> <sup>a</sup> | ATCC <sup>b</sup> |          |
|                        | C101    | C496 | 33D6                                        | ACS-1011          | ACS-1007 |
| Liver                  | 1       | 1    |                                             |                   |          |
| hPLC                   | 1       | 1    |                                             |                   |          |
| Li-iPSC <sup>c-d</sup> | 2       | 2    |                                             |                   |          |
| Li-HLC <sup>e</sup>    | 2       | 2    |                                             |                   |          |
| Fi-iPSC <sup>c-f</sup> |         |      | 2                                           | 2                 | 2        |
| Fi-HLC <sup>e</sup>    |         |      | 2                                           | 2                 | 2        |

- a. 33D6 foreskin fibroblast derived iPSCs. Sullivan GJ, Hay DC, Park IH, Fletcher J, Hannoun Z, Payne CM, Dalgetty D, Black JR, Ross JA, Samuel K *et al*: **Generation of functional human hepatic endoderm from human induced pluripotent stem cells.** *Hepatology (Baltimore, Md)* 2010, **51**(1):329-335.
- b. Commercial validated fibroblast derived iPSC lines acquired from ATCC, Manassas, Virginia, US.
- c. iPSC culture replicates.
- d. Sendai virus reprogrammed iPSCs.
- e. HLCs differentiated from independent iPSC cultures (c.).
- f. Retro virus reprogrammed iPSCs.
