# Supplementary material for: Liver biopsy derived induced pluripotent stem cells provide unlimited supply for the generation of hepatocyte-like cells
Source: PubMed Central journal article supplement (PMC6715171; doi:10.1371/journal.pone.0221762), 2019-08-29
Supplement: pone.0221762.s012.pdf [file pone.0221762.s012.pdf]

**S5 Table.** Gene sets significantly enriched in Li-iPSCs vs. Fi-iPSCs

| <b>Gene Set Name</b>              | <b># Genes<sup>a</sup></b> | <b>% of Gene set<sup>b</sup></b> | <b>p-value</b> | <b>FDR q-value</b> |
|-----------------------------------|----------------------------|----------------------------------|----------------|--------------------|
| EPITHELIAL MESENCHYMAL TRANSITION | 23                         | 12%                              | 1.85E-16       | 9.27E-15           |
| <b>COAGULATION</b>                | 17                         | 12%                              | 5.17E-13       | 1.29E-11           |
| MYOGENESIS                        | 19                         | 10%                              | 2.49E-12       | 4.15E-11           |
| <b>XENOBIOTIC METABOLISM</b>      | 15                         | 8%                               | 1.31E-08       | 1.64E-07           |
| APOPTOSIS                         | 12                         | 7%                               | 3.97E-07       | 3.97E-06           |
| APICAL JUNCTION                   | 13                         | 7%                               | 6.32E-07       | 4.52E-06           |
| ESTROGEN RESPONSE LATE            | 13                         | 7%                               | 6.32E-07       | 4.52E-06           |
| INFLAMMATORY RESPONSE             | 12                         | 6%                               | 3.90E-06       | 1.95E-05           |
| INTERFERON GAMMA RESPONSE         | 12                         | 6%                               | 3.90E-06       | 1.95E-05           |
| KRAS SIGNALING UP                 | 12                         | 6%                               | 3.90E-06       | 1.95E-05           |
| ALLOGRAFT REJECTION               | 11                         | 6%                               | 2.22E-05       | 9.23E-05           |
| <b>COMPLEMENT</b>                 | 11                         | 6%                               | 2.22E-05       | 9.23E-05           |
| <b>BILE ACID METABOLISM</b>       | 8                          | 7%                               | 4.69E-05       | 1.80E-04           |
| <b>GLYCOLYSIS</b>                 | 10                         | 5%                               | 1.15E-04       | 3.83E-04           |
| TNFA SIGNALING VIA NFKB           | 10                         | 5%                               | 1.15E-04       | 3.83E-04           |
| INTERFERON ALPHA RESPONSE         | 7                          | 7%                               | 1.31E-04       | 4.09E-04           |
| HYPOXIA                           | 9                          | 5%                               | 5.39E-04       | 1.59E-03           |
| ANGIOGENESIS                      | 4                          | 11%                              | 7.48E-04       | 2.08E-03           |
| PEROXISOME                        | 5                          | 5%                               | 7.01E-03       | 1.85E-02           |
| IL6 JAK STAT3 SIGNALING           | 4                          | 5%                               | 1.79E-02       | 4.48E-02           |

- a.** Number of significant genes overlapping with the Molecular Signatures Database (MSigDB) hallmark gene sets
- b.** Percentage of the hallmark gene set represented by the genes in overlap
