# Supplementary material for: Liver biopsy derived induced pluripotent stem cells provide unlimited supply for the generation of hepatocyte-like cells
Source: PubMed Central journal article supplement (PMC6715171; doi:10.1371/journal.pone.0221762), 2019-08-29
Supplement: pone.0221762.s013.pdf [file pone.0221762.s013.pdf]

**S6 Table.** Gene sets significantly down-regulated in Li-iPSCs vs. originating livers.

| <b>Gene Set Name</b>              | <b># Genes<sup>a</sup></b> | <b>% of Gene set<sup>b</sup></b> | <b>p-value</b> | <b>FDR q-value</b> |
|-----------------------------------|----------------------------|----------------------------------|----------------|--------------------|
| <b>XENOBIOTIC METABOLISM</b>      | 115                        | 58%                              | 2.09E-90       | 1.05E-88           |
| <b>FATTY ACID METABOLISM</b>      | 77                         | 49%                              | 1.36E-53       | 3.40E-52           |
| INTERFERON GAMMA RESPONSE         | 83                         | 42%                              | 1.05E-50       | 1.75E-49           |
| <b>COAGULATION</b>                | 67                         | 49%                              | 1.16E-46       | 1.44E-45           |
| <b>BILE ACID METABOLISM</b>       | 61                         | 54%                              | 1.56E-46       | 1.56E-45           |
| <b>ADIPOGENESIS</b>               | 72                         | 36%                              | 3.51E-39       | 2.92E-38           |
| INTERFERON ALPHA RESPONSE         | 45                         | 46%                              | 1.06E-30       | 7.54E-30           |
| <b>COMPLEMENT</b>                 | 61                         | 31%                              | 8.20E-29       | 5.12E-28           |
| KRAS SIGNALING UP                 | 59                         | 30%                              | 4.66E-27       | 2.59E-26           |
| PEROXISOME                        | 43                         | 41%                              | 7.36E-27       | 3.68E-26           |
| ESTROGEN RESPONSE EARLY           | 55                         | 28%                              | 1.12E-23       | 5.10E-23           |
| HYPOXIA                           | 54                         | 27%                              | 7.38E-23       | 3.08E-22           |
| ESTROGEN RESPONSE LATE            | 53                         | 27%                              | 4.74E-22       | 1.82E-21           |
| TNFA SIGNALING VIA NFKB           | 52                         | 26%                              | 2.96E-21       | 1.06E-20           |
| APOPTOSIS                         | 46                         | 29%                              | 8.69E-21       | 2.90E-20           |
| <b>HEME METABOLISM</b>            | 51                         | 26%                              | 1.81E-20       | 5.65E-20           |
| IL2 STAT5 SIGNALING               | 49                         | 25%                              | 6.20E-19       | 1.82E-18           |
| EPITHELIAL MESENCHYMAL TRANSITION | 47                         | 24%                              | 1.91E-17       | 5.31E-17           |
| <b>GLYCOLYSIS</b>                 | 46                         | 23%                              | 1.02E-16       | 2.54E-16           |
| INFLAMMATORY RESPONSE             | 46                         | 23%                              | 1.02E-16       | 2.54E-16           |
| UV RESPONSE UP                    | 39                         | 25%                              | 1.73E-15       | 4.11E-15           |
| OXIDATIVE PHOSPHORYLATION         | 42                         | 21%                              | 6.15E-14       | 1.34E-13           |
| P53 PATHWAY                       | 42                         | 21%                              | 6.15E-14       | 1.34E-13           |
| UV RESPONSE DN                    | 34                         | 24%                              | 4.31E-13       | 8.97E-13           |
| <b>CHOLESTEROL HOMEOSTASIS</b>    | 24                         | 32%                              | 7.11E-13       | 1.42E-12           |
| MYOGENESIS                        | 39                         | 20%                              | 5.49E-12       | 1.06E-11           |

|                                 |    |     |          |          |
|---------------------------------|----|-----|----------|----------|
| ALLOGRAFT REJECTION             | 38 | 19% | 2.31E-11 | 4.27E-11 |
| IL6 JAK STAT3 SIGNALING         | 24 | 28% | 3.45E-11 | 6.16E-11 |
| REACTIVE OXIGEN SPECIES PATHWAY | 15 | 31% | 3.48E-08 | 6.00E-08 |
| ANDROGEN RESPONSE               | 20 | 20% | 5.87E-07 | 9.78E-07 |
| APICAL JUNCTION                 | 30 | 15% | 6.70E-07 | 1.08E-06 |
| KRAS SIGNALING DN               | 27 | 14% | 1.73E-05 | 2.68E-05 |
| ANGIOGENESIS                    | 10 | 28% | 1.77E-05 | 2.68E-05 |
| MTORC1 SIGNALING                | 25 | 13% | 1.24E-04 | 1.82E-04 |
| PANCREAS BETA CELLS             | 8  | 20% | 1.36E-03 | 1.94E-03 |
| DNA REPAIR                      | 15 | 10% | 1.94E-02 | 2.69E-02 |
| UNFOLDED PROTEIN RESPONSE       | 12 | 11% | 2.25E-02 | 3.05E-02 |
| TGF BETA SIGNALING              | 7  | 13% | 2.85E-02 | 3.75E-02 |
| NOTCH SIGNALING                 | 5  | 16% | 2.98E-02 | 3.82E-02 |

- a.** Number of significant genes overlapping with the Molecular Signatures Database (MSigDB) hallmark gene sets
- b.** Percentage of the hallmark gene set represented by the genes in overlap
