# Supplementary material for: Liver biopsy derived induced pluripotent stem cells provide unlimited supply for the generation of hepatocyte-like cells
Source: PubMed Central journal article supplement (PMC6715171; doi:10.1371/journal.pone.0221762), 2019-08-29
Supplement: pone.0221762.s014.pdf [file pone.0221762.s014.pdf]

**S7 Table.** liver-specific gene sets (Molecular Signatures Database) expression in Li-HLCs compared to parental livers.

| Ensembl Transcript ID | Gene Symbol | C101    |        |                           |          |                             | C496    |         |                           |          |                             |
|-----------------------|-------------|---------|--------|---------------------------|----------|-----------------------------|---------|---------|---------------------------|----------|-----------------------------|
|                       |             | Liver   | Li-HLC | Li-HLC/Liver <sup>a</sup> | p-value  | Li-HLC/Li-iPSC <sup>b</sup> | Liver   | Li-HLC  | Li-HLC/Liver <sup>a</sup> | p-value  | Li-HLC/Li-iPSC <sup>b</sup> |
| ENSG0000023839        | ABCC2       | 50.99   | 1.14   | 0.02                      | 1.56E-07 | 1.4                         | 73.08   | 13.59   | 0.19                      | 1.00E-04 | 24.7                        |
| ENSG00000108846       | ABCC3       | 44.93   | 2.33   | 0.05                      | 8.83E-07 | 39.1                        | 51.69   | 3.97    | 0.08                      | 3.45E-06 | 26.3                        |
| ENSG00000163686       | ABHD6       | 14.00   | 6.10   | 0.44                      | 0.00E+00 | 1.9                         | 14.14   | 14.98   | 1.06                      | 2.20E-03 | 5.0                         |
| ENSG00000100412       | ACO2        | 27.97   | 74.05  | 2.65                      | 8.80E-03 | 1.2                         | 22.70   | 108.94  | 4.80                      | NS       | 1.6                         |
| ENSG00000161533       | ACOX1       | 55.87   | 17.86  | 0.32                      | 7.51E-07 | 1.9                         | 57.78   | 23.32   | 0.40                      | 2.60E-06 | 2.8                         |
| ENSG00000168306       | ACOX2       | 116.27  | 0.29   | 0.00                      | 1.50E-08 | 0.1                         | 166.28  | 4.61    | 0.03                      | 3.85E-06 | 1.6                         |
| ENSG00000087008       | ACOX3       | 8.23    | 9.97   | 1.21                      | 1.00E-04 | 1.5                         | 7.06    | 13.00   | 1.84                      | 8.00E-04 | 2.0                         |
| ENSG00000143727       | ACP1        | 21.52   | 64.73  | 3.01                      | NS       | 0.7                         | 21.69   | 76.61   | 3.53                      | NS       | 0.8                         |
| ENSG00000134575       | ACP2        | 39.18   | 58.75  | 1.50                      | 9.00E-04 | 3.6                         | 33.60   | 48.93   | 1.46                      | 8.00E-04 | 2.7                         |
| ENSG00000166743       | ACSM1       | 1.09    | 0.11   | 0.10                      | 2.00E-04 | 1.2                         | 0.40    | 0.18    | 0.46                      | 7.00E-04 | 0.5                         |
| ENSG00000248144       | ADH1C       | 944.48  | 0.00   | 0.00                      | 1.11E-10 | #DIV/0!                     | 892.47  | 0.33    | 0.00                      | 3.44E-09 | 2.3                         |
| ENSG00000197894       | ADH5        | 54.27   | 102.56 | 1.89                      | 9.00E-04 | 0.8                         | 57.95   | 127.08  | 2.19                      | 3.00E-03 | 0.9                         |
| ENSG00000101444       | AHCY        | 51.43   | 119.04 | 2.31                      | 2.40E-03 | 0.4                         | 60.39   | 184.61  | 3.06                      | NS       | 0.5                         |
| ENSG00000151632       | AKR1C2      | 26.54   | 0.22   | 0.01                      | 8.37E-07 | 0.9                         | 78.90   | 17.72   | 0.22                      | 4.00E-04 | 29.5                        |
| ENSG00000196139       | AKR1C3      | 41.27   | 0.29   | 0.01                      | 5.06E-08 | 0.3                         | 38.08   | 39.21   | 1.03                      | NS       | 14.8                        |
| ENSG00000023330       | ALAS1       | 80.30   | 43.64  | 0.54                      | 0.00E+00 | 1.0                         | 92.31   | 61.93   | 0.67                      | 1.00E-04 | 1.5                         |
| ENSG00000111275       | ALDH2       | 1213.55 | 120.45 | 0.10                      | 1.65E-07 | 2.0                         | 1511.06 | 187.48  | 0.12                      | 7.77E-07 | 3.2                         |
| ENSG00000143149       | ALDH9A1     | 80.16   | 75.13  | 0.94                      | 0.00E+00 | 0.9                         | 89.10   | 72.28   | 0.81                      | 0.00E+00 | 0.8                         |
| ENSG00000132855       | ANGPTL3     | 242.72  | 0.00   | 0.00                      | 5.64E-09 | #DIV/0!                     | 195.47  | 16.45   | 0.08                      | 7.00E-04 | 269.0                       |
| ENSG00000138356       | AOX1        | 241.67  | 1.14   | 0.00                      | 3.63E-07 | 0.2                         | 262.38  | 2.98    | 0.01                      | 1.76E-06 | 0.4                         |
| ENSG00000134262       | AP4B1       | 3.54    | 8.37   | 2.36                      | NS       | 1.2                         | 3.15    | 7.79    | 2.47                      | NS       | 1.1                         |
| ENSG00000130203       | APOE        | 2589.24 | 449.37 | 0.17                      | 0.00E+00 | 1.3                         | 2690.60 | 1522.84 | 0.57                      | 6.00E-04 | 4.1                         |
| ENSG00000118520       | ARG1        | 410.57  | 0.02   | 0.00                      | 3.15E-09 | 0.2                         | 376.90  | 0.31    | 0.00                      | 2.61E-09 | 1.1                         |
| ENSG00000081181       | ARG2        | 0.21    | 114.22 | 538.65                    | 4.13E-06 | 2.0                         | 0.12    | 100.17  | 829.42                    | 5.57E-06 | 1.5                         |
| ENSG00000128989       | ARPP19      | 8.43    | 148.54 | 17.62                     | 1.50E-03 | 1.2                         | 7.77    | 175.45  | 22.59                     | 1.90E-03 | 1.4                         |
| ENSG00000126522       | ASL         | 145.69  | 21.73  | 0.15                      | 5.71E-06 | 1.1                         | 135.89  | 26.98   | 0.20                      | 0.00E+00 | 1.1                         |
| ENSG00000168874       | ATOH8       | 3.54    | 0.04   | 0.01                      | 1.59E-06 | 0.2                         | 6.62    | 1.37    | 0.21                      | 1.30E-03 | 3.6                         |
| ENSG00000174437       | ATP2A2      | 10.67   | 84.29  | 7.90                      | NS       | 1.0                         | 12.85   | 94.95   | 7.39                      | NS       | 1.0                         |

|                 |                |        |       |        |          |      |         |       |         |          |      |
|-----------------|----------------|--------|-------|--------|----------|------|---------|-------|---------|----------|------|
| ENSG00000050820 | <b>BCAR1</b>   | 3.78   | 66.83 | 17.68  | 3.00E-04 | 2.7  | 4.24    | 47.86 | 11.28   | 4.80E-03 | 2.0  |
| ENSG00000060982 | <b>BCAT1</b>   | 0.27   | 76.99 | 281.31 | 0.00E+00 | 0.6  | 0.06    | 85.84 | 1346.09 | 0.00E+00 | 0.5  |
| ENSG00000090013 | <b>BLVRB</b>   | 66.94  | 74.93 | 1.12   | 4.00E-04 | 2.9  | 106.09  | 87.90 | 0.83    | 7.00E-04 | 3.0  |
| ENSG00000137274 | <b>BPHL</b>    | 43.37  | 12.37 | 0.29   | 0.00E+00 | 0.9  | 49.15   | 12.70 | 0.26    | 0.00E+00 | 0.9  |
| ENSG00000104267 | <b>CA2</b>     | 61.14  | 8.06  | 0.13   | 2.07E-06 | 0.7  | 69.17   | 28.19 | 0.41    | 1.00E-04 | 3.4  |
| ENSG00000138794 | <b>CASP6</b>   | 9.96   | 35.10 | 3.52   | NS       | 1.5  | 9.91    | 47.46 | 4.79    | NS       | 1.6  |
| ENSG00000121691 | <b>CAT</b>     | 341.00 | 10.86 | 0.03   | 1.54E-07 | 0.9  | 400.58  | 21.17 | 0.05    | 5.49E-07 | 1.5  |
| ENSG00000159228 | <b>CBR1</b>    | 106.87 | 28.48 | 0.27   | 4.13E-06 | 0.3  | 130.30  | 24.05 | 0.18    | 2.25E-06 | 0.3  |
| ENSG00000131142 | <b>CCL25</b>   | 0.32   | 0.44  | 1.38   | NS       | 1.1  | 0.23    | 1.23  | 5.29    | NS       | 1.5  |
| ENSG00000158825 | <b>CDA</b>     | 34.51  | 0.00  | 0.00   | 1.04E-08 | 0.0  | 36.58   | 0.32  | 0.01    | 1.99E-06 | 0.0  |
| ENSG00000129596 | <b>CDO1</b>    | 153.87 | 10.95 | 0.07   | 7.80E-08 | 0.5  | 153.12  | 32.11 | 0.21    | 0.00E+00 | 1.5  |
| ENSG00000198848 | <b>CES1</b>    | 701.00 | 0.04  | 0.00   | 4.74E-10 | 0.3  | 713.75  | 4.30  | 0.01    | 9.05E-09 | 1.1  |
| ENSG00000243649 | <b>CFB</b>     | 463.52 | 0.32  | 0.00   | 7.08E-08 | 9.3  | 359.88  | 1.70  | 0.00    | 3.80E-07 | 11.7 |
| ENSG00000133313 | <b>CNDP2</b>   | 20.68  | 59.50 | 2.88   | 5.10E-03 | 1.2  | 23.53   | 53.88 | 2.29    | 5.10E-03 | 1.1  |
| ENSG00000093010 | <b>COMT</b>    | 29.29  | 11.49 | 0.39   | 0.00E+00 | 3.0  | 33.39   | 12.35 | 0.37    | 0.00E+00 | 2.0  |
| ENSG00000005469 | <b>CROT</b>    | 7.03   | 5.81  | 0.83   | 1.00E-04 | 1.8  | 9.36    | 15.57 | 1.66    | 5.00E-03 | 5.3  |
| ENSG00000139631 | <b>CSAD</b>    | 43.59  | 9.29  | 0.21   | 1.00E-04 | 3.4  | 52.84   | 9.93  | 0.19    | 2.00E-04 | 3.2  |
| ENSG00000166347 | <b>CYB5A</b>   | 99.96  | 6.56  | 0.07   | 1.59E-07 | 0.4  | 117.69  | 16.00 | 0.14    | 3.65E-06 | 0.9  |
| ENSG00000055163 | <b>CYFIP2</b>  | 3.76   | 13.14 | 3.49   | NS       | 0.5  | 3.12    | 40.83 | 13.10   | NS       | 1.6  |
| ENSG00000140465 | <b>CYP1A1</b>  | 4.46   | 14.33 | 3.21   | NS       | 25.6 | 21.25   | 34.58 | 1.63    | NS       | 42.8 |
| ENSG00000140505 | <b>CYP1A2</b>  | 130.03 | 0.00  | 0.00   | 9.11E-08 | 0.0  | 421.27  | 0.22  | 0.00    | 3.28E-07 | 1.5  |
| ENSG00000095596 | <b>CYP26A1</b> | 26.85  | 0.26  | 0.01   | 1.00E-04 | 0.1  | 3.05    | 4.05  | 1.33    | 7.10E-03 | 0.5  |
| ENSG00000135929 | <b>CYP27A1</b> | 303.83 | 6.18  | 0.02   | 2.50E-08 | 1.0  | 374.56  | 19.40 | 0.05    | 8.89E-07 | 4.8  |
| ENSG00000108242 | <b>CYP2C18</b> | 70.80  | 0.83  | 0.01   | 1.21E-07 | 5.4  | 67.77   | 0.91  | 0.01    | 3.77E-07 | 2.9  |
| ENSG00000130649 | <b>CYP2E1</b>  | 661.76 | 0.03  | 0.00   | 3.87E-09 | 2.0  | 1238.74 | 0.41  | 0.00    | 1.73E-08 | 1.9  |
| ENSG00000134716 | <b>CYP2J2</b>  | 44.90  | 0.36  | 0.01   | 3.03E-08 | 0.3  | 68.68   | 1.80  | 0.03    | 1.20E-06 | 0.9  |
| ENSG00000167600 | <b>CYP2S1</b>  | 0.38   | 23.44 | 61.32  | 4.20E-03 | 0.1  | 0.31    | 47.37 | 151.80  | 1.20E-03 | 0.2  |
| ENSG00000169738 | <b>DCXR</b>    | 770.67 | 38.77 | 0.05   | 8.46E-06 | 1.0  | 1180.46 | 62.79 | 0.05    | 0.00E+00 | 1.6  |
| ENSG00000213722 | <b>DDAH2</b>   | 5.73   | 31.78 | 5.54   | NS       | 1.9  | 7.46    | 37.94 | 5.08    | NS       | 1.7  |
| ENSG00000132437 | <b>DDC</b>     | 17.34  | 0.78  | 0.04   | 4.10E-07 | 7.9  | 15.58   | 6.56  | 0.42    | 0.00E+00 | 44.5 |
| ENSG00000099977 | <b>DDT</b>     | 98.30  | 17.01 | 0.17   | 4.12E-06 | 0.7  | 135.98  | 28.72 | 0.21    | 0.00E+00 | 1.2  |
| ENSG00000095059 | <b>DHPS</b>    | 19.24  | 32.46 | 1.69   | 4.10E-03 | 1.0  | 19.44   | 33.57 | 1.73    | 5.20E-03 | 0.9  |
| ENSG00000157379 | <b>DHRS1</b>   | 59.95  | 10.86 | 0.18   | 1.00E-04 | 2.1  | 90.41   | 11.52 | 0.13    | 1.00E-04 | 1.7  |

|                 |                  |        |         |       |          |         |        |        |        |          |         |
|-----------------|------------------|--------|---------|-------|----------|---------|--------|--------|--------|----------|---------|
| ENSG00000100612 | <b>DHRS7</b>     | 21.15  | 39.71   | 1.88  | 1.00E-03 | 2.9     | 20.77  | 57.34  | 2.76   | 8.50E-03 | 2.7     |
| ENSG00000104823 | <b>ECHI</b>      | 172.35 | 52.06   | 0.30  | 4.18E-06 | 0.7     | 215.23 | 70.43  | 0.33   | 0.00E+00 | 0.8     |
| ENSG00000012660 | <b>ELOVL5</b>    | 24.80  | 140.67  | 5.67  | NS       | 1.0     | 27.04  | 128.98 | 4.77   | NS       | 0.9     |
| ENSG00000138792 | <b>ENPEP</b>     | 9.37   | 149.95  | 16.01 | NS       | 229.8   | 10.35  | 58.28  | 5.63   | NS       | 83.3    |
| ENSG00000187097 | <b>ENTPD5</b>    | 38.81  | 7.41    | 0.19  | 6.09E-06 | 3.0     | 44.70  | 9.00   | 0.20   | 8.88E-06 | 2.2     |
| ENSG00000142627 | <b>EPHA2</b>     | 3.98   | 144.97  | 36.47 | 8.09E-06 | 4.4     | 4.47   | 164.93 | 36.87  | 0.00E+00 | 6.0     |
| ENSG00000143819 | <b>EPHX1</b>     | 646.92 | 50.60   | 0.08  | 6.73E-08 | 0.9     | 700.07 | 111.99 | 0.16   | 4.84E-06 | 1.9     |
| ENSG00000171503 | <b>ETFDH</b>     | 31.63  | 7.04    | 0.22  | 0.00E+00 | 1.1     | 31.97  | 11.69  | 0.37   | 0.00E+00 | 1.6     |
| ENSG00000157557 | <b>ETS2</b>      | 19.99  | 89.75   | 4.49  | NS       | 2.7     | 16.21  | 49.83  | 3.07   | NS       | 1.9     |
| ENSG00000126218 | <b>F10</b>       | 77.41  | 0.29    | 0.00  | 3.90E-08 | 0.4     | 70.46  | 11.16  | 0.16   | 0.00E+00 | 4.3     |
| ENSG00000163586 | <b>FABP1</b>     | 833.54 | 0.87    | 0.00  | 3.11E-08 | 32.2    | 792.69 | 2.37   | 0.00   | 2.21E-06 | 16.0    |
| ENSG00000103876 | <b>FAH</b>       | 41.82  | 12.60   | 0.30  | 1.83E-06 | 2.3     | 53.48  | 9.19   | 0.17   | 0.00E+00 | 1.5     |
| ENSG00000026103 | <b>FAS</b>       | 6.49   | 32.96   | 5.07  | NS       | 3.3     | 4.01   | 47.32  | 11.80  | NS       | 9.9     |
| ENSG00000077942 | <b>FBLN1</b>     | 5.62   | 413.78  | 73.61 | 5.00E-04 | 6.6     | 0.56   | 223.88 | 396.42 | 3.00E-03 | 3.6     |
| ENSG00000165140 | <b>FBP1</b>      | 486.35 | 0.76    | 0.00  | 7.12E-09 | 0.2     | 549.27 | 1.30   | 0.00   | 1.53E-08 | 0.4     |
| ENSG00000010932 | <b>FMO1</b>      | 0.31   | 0.47    | 1.53  | NS       | 25.9    | 0.12   | 3.63   | 31.37  | 4.10E-03 | 97.7    |
| ENSG00000139112 | <b>GABARAPL1</b> | 45.19  | 134.94  | 2.99  | NS       | 2.4     | 39.32  | 151.39 | 3.85   | NS       | 3.1     |
| ENSG00000159131 | <b>GART</b>      | 3.49   | 45.64   | 13.07 | NS       | 0.6     | 3.45   | 41.67  | 12.09  | NS       | 0.6     |
| ENSG00000131979 | <b>GCH1</b>      | 32.99  | 22.78   | 0.69  | 0.00E+00 | 2.1     | 33.57  | 39.22  | 1.17   | 9.00E-04 | 2.6     |
| ENSG00000084734 | <b>GCKR</b>      | 108.84 | 0.58    | 0.01  | 3.55E-07 | 2.6     | 139.02 | 0.73   | 0.01   | 2.39E-06 | 2.2     |
| ENSG00000001084 | <b>GCLC</b>      | 22.08  | 18.19   | 0.82  | 0.00E+00 | 0.8     | 26.65  | 42.87  | 1.61   | 1.40E-03 | 1.8     |
| ENSG00000111846 | <b>GCNT2</b>     | 1.93   | 10.50   | 5.45  | NS       | 0.4     | 2.10   | 24.03  | 11.42  | NS       | 1.1     |
| ENSG00000124713 | <b>GNMT</b>      | 219.19 | 0.99    | 0.00  | 3.64E-08 | 0.4     | 218.39 | 0.98   | 0.00   | 8.88E-08 | 0.4     |
| ENSG00000104687 | <b>GSR</b>       | 20.26  | 58.68   | 2.90  | NS       | 0.7     | 17.26  | 133.39 | 7.73   | NS       | 1.7     |
| ENSG00000100983 | <b>GSS</b>       | 28.99  | 77.48   | 2.67  | NS       | 2.0     | 31.72  | 91.31  | 2.88   | NS       | 2.1     |
| ENSG00000174156 | <b>GSTA3</b>     | 1.31   | 0.11    | 0.09  | 2.53E-06 | #DIV/0! | 1.99   | 0.16   | 0.08   | 0.00E+00 | #DIV/0! |
| ENSG00000168765 | <b>GSTM4</b>     | 25.82  | 2.77    | 0.11  | 5.00E-04 | 0.4     | 7.78   | 9.16   | 1.18   | 5.60E-03 | 1.3     |
| ENSG00000148834 | <b>GSTO1</b>     | 154.17 | 332.41  | 2.16  | 7.20E-03 | 8.3     | 132.14 | 195.18 | 1.48   | 4.00E-04 | 8.7     |
| ENSG00000099984 | <b>GSTT2</b>     | 11.74  | 3.65    | 0.31  | NS       | 0.4     | 4.79   | 0.85   | 0.18   | 8.00E-04 | 0.2     |
| ENSG00000131373 | <b>HACL1</b>     | 11.69  | 18.16   | 1.55  | 7.00E-04 | 0.5     | 18.49  | 26.67  | 1.44   | 2.90E-03 | 0.5     |
| ENSG00000144485 | <b>HES6</b>      | 1.32   | 8.65    | 6.56  | NS       | 0.4     | 1.91   | 10.17  | 5.31   | NS       | 0.4     |
| ENSG00000109758 | <b>HGFAC</b>     | 273.15 | 0.81    | 0.00  | 3.33E-06 | 6.9     | 339.75 | 0.41   | 0.00   | 1.21E-06 | 2.5     |
| ENSG00000100292 | <b>HMOX1</b>     | 21.36  | 1079.95 | 50.56 | 9.30E-03 | 33.2    | 5.71   | 628.24 | 110.09 | NS       | 15.6    |

|                 |                |         |        |        |          |         |         |        |         |          |        |
|-----------------|----------------|---------|--------|--------|----------|---------|---------|--------|---------|----------|--------|
| ENSG00000101076 | <b>HNF4A</b>   | 100.42  | 0.57   | 0.01   | 3.22E-08 | 92.0    | 93.59   | 32.79  | 0.35    | 4.00E-04 | 553.1  |
| ENSG00000165704 | <b>HPRT1</b>   | 14.75   | 69.16  | 4.69   | NS       | 0.9     | 15.46   | 39.13  | 2.53    | NS       | 0.5    |
| ENSG00000113905 | <b>HRG</b>     | 1116.51 | 0.06   | 0.00   | 3.54E-09 | 0.7     | 965.07  | 0.82   | 0.00    | 1.09E-07 | 2.9    |
| ENSG00000117594 | <b>HSD11B1</b> | 315.05  | 0.20   | 0.00   | 1.14E-08 | #DIV/0! | 305.94  | 0.19   | 0.00    | 1.94E-07 | 3.0    |
| ENSG00000086696 | <b>HSD17B2</b> | 13.01   | 0.13   | 0.01   | 1.40E-07 | #DIV/0! | 12.59   | 5.82   | 0.46    | 5.00E-04 | 1642.7 |
| ENSG00000115738 | <b>ID2</b>     | 52.26   | 31.75  | 0.61   | 0.00E+00 | 1.0     | 58.39   | 156.29 | 2.68    | NS       | 6.2    |
| ENSG00000138413 | <b>IDH1</b>    | 130.12  | 76.64  | 0.59   | 8.11E-06 | 0.3     | 125.10  | 176.61 | 1.41    | 1.20E-03 | 0.5    |
| ENSG00000017427 | <b>IGF1</b>    | 6.70    | 0.09   | 0.01   | 0.00E+00 | 11.2    | 5.37    | 1.74   | 0.32    | 7.00E-04 | 142.5  |
| ENSG00000141753 | <b>IGFBP4</b>  | 686.62  | 330.07 | 0.48   | 0.00E+00 | 2.5     | 546.56  | 125.63 | 0.23    | 1.00E-04 | 0.7    |
| ENSG00000115594 | <b>IL1R1</b>   | 18.48   | 295.17 | 15.97  | 2.00E-03 | 847.9   | 15.47   | 139.16 | 8.99    | NS       | 371.3  |
| ENSG00000140968 | <b>IRF8</b>    | 4.51    | 0.84   | 0.19   | 9.66E-07 | 2.9     | 3.59    | 0.64   | 0.18    | 1.47E-06 | 2.3    |
| ENSG00000055957 | <b>ITIH1</b>   | 727.41  | 0.01   | 0.00   | 1.29E-09 | #DIV/0! | 764.58  | 0.27   | 0.00    | 3.43E-09 | 1.3    |
| ENSG00000055955 | <b>ITIH4</b>   | 1366.41 | 2.44   | 0.00   | 1.31E-09 | 4.6     | 1034.48 | 2.24   | 0.00    | 3.85E-08 | 2.5    |
| ENSG00000173801 | <b>JUP</b>     | 29.44   | 372.69 | 12.66  | 2.00E-04 | 5.9     | 27.78   | 351.69 | 12.66   | 6.40E-03 | 4.6    |
| ENSG00000065427 | <b>KARS</b>    | 17.20   | 169.37 | 9.85   | 5.20E-03 | 1.0     | 20.03   | 155.79 | 7.78    | NS       | 0.9    |
| ENSG00000115919 | <b>KYNU</b>    | 3.61    | 0.21   | 0.06   | 6.13E-07 | 5.7     | 3.72    | 0.76   | 0.20    | 0.00E+00 | 23.9   |
| ENSG00000213398 | <b>LCAT</b>    | 110.40  | 30.81  | 0.28   | 1.88E-06 | 6.0     | 124.45  | 24.67  | 0.20    | 2.10E-06 | 5.5    |
| ENSG00000164406 | <b>LEAP2</b>   | 69.33   | 1.71   | 0.02   | 2.45E-07 | 1.0     | 59.29   | 1.64   | 0.03    | 3.33E-07 | 0.8    |
| ENSG00000196365 | <b>LONP1</b>   | 20.91   | 84.25  | 4.03   | NS       | 0.9     | 21.76   | 99.42  | 4.57    | NS       | 1.2    |
| ENSG00000101577 | <b>LPIN2</b>   | 28.14   | 28.91  | 1.03   | 1.00E-04 | 2.2     | 34.43   | 47.49  | 1.38    | 1.40E-03 | 3.4    |
| ENSG00000111885 | <b>MAN1A1</b>  | 52.89   | 85.74  | 1.62   | 3.30E-03 | 23.3    | 38.84   | 85.94  | 2.21    | 6.60E-03 | 25.1   |
| ENSG00000189221 | <b>MAOA</b>    | 48.58   | 2.71   | 0.06   | 5.37E-07 | 0.6     | 46.58   | 3.50   | 0.08    | 9.56E-07 | 0.7    |
| ENSG00000145495 | <b>MARC6</b>   | 13.92   | 58.16  | 4.18   | NS       | 1.7     | 13.80   | 63.01  | 4.57    | NS       | 1.7    |
| ENSG00000165471 | <b>MBL2</b>    | 38.25   | 0.28   | 0.01   | 7.57E-06 | #DIV/0! | 63.80   | 0.93   | 0.01    | 0.00E+00 | 50.1   |
| ENSG00000131844 | <b>MCCC2</b>   | 35.05   | 26.96  | 0.77   | 0.00E+00 | 0.4     | 32.98   | 33.43  | 1.01    | 1.00E-04 | 0.5    |
| ENSG00000125148 | <b>MT2A</b>    | 1369.60 | 379.63 | 0.28   | 2.00E-04 | 5.4     | 827.35  | 319.32 | 0.39    | 1.00E-04 | 2.6    |
| ENSG00000100714 | <b>MTHFD1</b>  | 53.10   | 37.93  | 0.71   | 1.00E-04 | 0.3     | 50.04   | 54.53  | 1.09    | 3.00E-04 | 0.4    |
| ENSG00000165795 | <b>NDRG2</b>   | 95.59   | 2.52   | 0.03   | 7.08E-08 | 0.4     | 113.32  | 6.23   | 0.06    | 3.92E-07 | 0.8    |
| ENSG00000244005 | <b>NFS1</b>    | 10.38   | 10.76  | 1.04   | 1.00E-04 | 1.1     | 11.37   | 12.97  | 1.14    | 3.00E-04 | 1.3    |
| ENSG00000131669 | <b>NINJ1</b>   | 21.81   | 11.80  | 0.54   | 2.39E-06 | 0.7     | 19.98   | 48.42  | 2.42    | NS       | 2.5    |
| ENSG00000136448 | <b>NMT1</b>    | 19.97   | 78.89  | 3.95   | NS       | 1.1     | 20.90   | 95.20  | 4.55    | NS       | 1.2    |
| ENSG00000141458 | <b>NPC1</b>    | 1.47    | 52.94  | 35.91  | 7.00E-04 | 3.2     | 1.57    | 60.55  | 38.59   | 7.00E-04 | 3.4    |
| ENSG00000181019 | <b>NQO1</b>    | 0.38    | 303.69 | 809.49 | 1.00E-06 | 10.1    | 0.21    | 626.55 | 2962.00 | 1.18E-06 | 13.9   |

|                 |                 |         |        |        |          |      |         |        |        |          |       |
|-----------------|-----------------|---------|--------|--------|----------|------|---------|--------|--------|----------|-------|
| ENSG00000198682 | <b>PAPSS2</b>   | 30.97   | 7.67   | 0.25   | 4.63E-06 | 0.3  | 31.27   | 22.68  | 0.73   | 2.00E-04 | 0.8   |
| ENSG00000173599 | <b>PC</b>       | 39.27   | 3.08   | 0.08   | 6.02E-07 | 0.4  | 36.26   | 9.69   | 0.27   | 8.61E-06 | 1.1   |
| ENSG00000004799 | <b>PDK4</b>     | 45.07   | 5.94   | 0.13   | 8.07E-06 | 73.5 | 99.37   | 4.03   | 0.04   | 0.00E+00 | 49.8  |
| ENSG00000163110 | <b>PDLIM5</b>   | 12.51   | 48.05  | 3.84   | NS       | 2.2  | 12.67   | 34.45  | 2.72   | NS       | 2.5   |
| ENSG00000133027 | <b>PEMT</b>     | 64.28   | 19.85  | 0.31   | 1.14E-06 | 0.6  | 76.71   | 19.92  | 0.26   | 1.94E-06 | 0.6   |
| ENSG00000142657 | <b>PGD</b>      | 26.29   | 196.36 | 7.47   | 6.70E-03 | 0.7  | 24.61   | 304.70 | 12.38  | 1.40E-03 | 0.9   |
| ENSG00000101856 | <b>PGRMC1</b>   | 398.83  | 228.67 | 0.57   | 2.73E-06 | 0.7  | 403.13  | 249.17 | 0.62   | 7.57E-06 | 0.7   |
| ENSG00000158828 | <b>PINK1</b>    | 40.96   | 44.73  | 1.09   | 0.00E+00 | 3.1  | 36.75   | 39.73  | 1.08   | 1.00E-04 | 3.3   |
| ENSG00000122194 | <b>PLG</b>      | 531.41  | 0.15   | 0.00   | 6.04E-09 | 7.3  | 580.42  | 0.29   | 0.00   | 2.06E-08 | 1.7   |
| ENSG00000100417 | <b>PMM1</b>     | 20.61   | 22.13  | 1.07   | NS       | 6.2  | 15.91   | 28.61  | 1.80   | NS       | 7.1   |
| ENSG00000127948 | <b>POR</b>      | 54.92   | 44.06  | 0.80   | 0.00E+00 | 1.2  | 60.24   | 41.83  | 0.69   | 0.00E+00 | 1.1   |
| ENSG00000112033 | <b>PPARD</b>    | 6.45    | 20.34  | 3.15   | NS       | 1.3  | 4.20    | 23.44  | 5.58   | NS       | 1.5   |
| ENSG00000184500 | <b>PROS1</b>    | 83.88   | 7.80   | 0.09   | 2.25E-06 | 6.1  | 74.24   | 49.81  | 0.67   | 1.00E-04 | 25.2  |
| ENSG00000205220 | <b>PSMB10</b>   | 18.54   | 18.29  | 0.99   | 2.00E-04 | 1.1  | 17.00   | 13.16  | 0.77   | 1.20E-03 | 0.8   |
| ENSG00000107317 | <b>PTGDS</b>    | 7.76    | 0.03   | 0.00   | 5.53E-06 | 0.2  | 3.10    | 1.43   | 0.46   | 1.30E-03 | 5.7   |
| ENSG00000148344 | <b>PTGES</b>    | 0.30    | 84.66  | 285.84 | 0.00E+00 | 20.0 | 0.10    | 63.02  | 636.52 | 2.00E-04 | 10.6  |
| ENSG00000110958 | <b>PTGES3</b>   | 45.43   | 252.13 | 5.55   | NS       | 0.7  | 59.17   | 261.65 | 4.42   | NS       | 0.6   |
| ENSG00000106853 | <b>PTGR1</b>    | 156.93  | 68.07  | 0.43   | 3.00E-04 | 4.2  | 191.26  | 404.26 | 2.11   | NS       | 19.1  |
| ENSG00000150787 | <b>PTS</b>      | 13.44   | 46.23  | 3.44   | NS       | 4.2  | 8.06    | 49.80  | 6.18   | NS       | 4.8   |
| ENSG00000183010 | <b>PYCR1</b>    | 1.48    | 95.39  | 64.43  | 1.20E-03 | 0.8  | 3.44    | 108.82 | 31.63  | 1.10E-03 | 0.9   |
| ENSG00000076864 | <b>RAP1GAP</b>  | 4.96    | 1.55   | 0.31   | 0.00E+00 | 0.3  | 4.55    | 8.84   | 1.94   | NS       | 1.4   |
| ENSG00000138207 | <b>RBP4</b>     | 7050.33 | 6.18   | 0.00   | 8.54E-08 | 8.9  | 7284.92 | 171.30 | 0.02   | 1.07E-06 | 121.3 |
| ENSG00000042445 | <b>RETSAT</b>   | 49.45   | 20.76  | 0.42   | 4.92E-06 | 1.8  | 55.79   | 39.89  | 0.71   | 1.00E-04 | 3.1   |
| ENSG00000152700 | <b>SAR1B</b>    | 17.66   | 12.34  | 0.70   | 6.20E-06 | 2.4  | 20.48   | 18.01  | 0.88   | 1.00E-04 | 3.4   |
| ENSG00000106366 | <b>SERPINE1</b> | 6.63    | 623.82 | 94.12  | 2.00E-04 | 70.5 | 17.41   | 294.22 | 16.90  | 3.80E-03 | 30.8  |
| ENSG00000197019 | <b>SERTAD1</b>  | 5.51    | 31.68  | 5.75   | NS       | 4.6  | 3.44    | 36.91  | 10.72  | NS       | 3.9   |
| ENSG00000182199 | <b>SHMT2</b>    | 62.21   | 326.69 | 5.25   | NS       | 2.4  | 71.70   | 290.96 | 4.06   | NS       | 2.0   |
| ENSG00000124067 | <b>SLC12A4</b>  | 8.99    | 57.37  | 6.38   | NS       | 4.8  | 7.19    | 69.15  | 9.61   | NS       | 6.1   |
| ENSG00000105281 | <b>SLC1A5</b>   | 1.37    | 640.33 | 467.30 | 4.81E-06 | 3.2  | 1.02    | 449.17 | 440.21 | 0.00E+00 | 1.8   |
| ENSG00000175003 | <b>SLC22A1</b>  | 480.10  | 0.77   | 0.00   | 1.57E-09 | 3.0  | 501.68  | 0.90   | 0.00   | 2.10E-09 | 2.3   |
| ENSG00000121073 | <b>SLC35B1</b>  | 8.41    | 22.32  | 2.65   | NS       | 1.2  | 11.58   | 23.93  | 2.07   | NS       | 1.2   |
| ENSG00000116704 | <b>SLC35D1</b>  | 29.06   | 23.47  | 0.81   | 2.00E-04 | 6.3  | 28.84   | 22.87  | 0.79   | 2.00E-04 | 5.2   |
| ENSG00000139508 | <b>SLC46A3</b>  | 50.08   | 4.05   | 0.08   | 8.81E-08 | 10.4 | 46.22   | 3.28   | 0.07   | 9.46E-08 | 7.5   |

|                 |                 |         |        |        |          |      |         |        |        |          |       |
|-----------------|-----------------|---------|--------|--------|----------|------|---------|--------|--------|----------|-------|
| ENSG0000011181  | <b>SLC6A12</b>  | 35.18   | 0.14   | 0.00   | 2.52E-09 | 0.6  | 31.24   | 0.41   | 0.01   | 9.35E-08 | 1.5   |
| ENSG00000131389 | <b>SLC6A6</b>   | 0.61    | 16.28  | 26.85  | NS       | 0.2  | 0.20    | 30.98  | 157.19 | 9.10E-03 | 0.3   |
| ENSG00000088826 | <b>SMOX</b>     | 0.98    | 61.28  | 62.66  | 6.63E-06 | 7.0  | 0.98    | 74.16  | 75.90  | 0.00E+00 | 8.6   |
| ENSG00000167642 | <b>SPINT2</b>   | 1.84    | 220.06 | 119.54 | 1.36E-06 | 2.4  | 1.06    | 197.31 | 185.59 | 3.01E-06 | 2.0   |
| ENSG00000114850 | <b>SSR3</b>     | 17.58   | 218.13 | 12.41  | 9.90E-03 | 2.1  | 24.38   | 171.04 | 7.02   | NS       | 1.5   |
| ENSG00000198650 | <b>TAT</b>      | 262.82  | 0.07   | 0.00   | 6.55E-08 | 1.1  | 369.98  | 0.28   | 0.00   | 1.28E-07 | 2.4   |
| ENSG00000151790 | <b>TDO2</b>     | 81.84   | 0.04   | 0.00   | 1.35E-06 | 3.4  | 56.20   | 1.23   | 0.02   | 5.33E-07 | 24.6  |
| ENSG00000092969 | <b>TGFB2</b>    | 0.20    | 46.28  | 227.08 | 2.22E-06 | 58.5 | 0.11    | 52.05  | 459.11 | 1.00E-04 | 126.6 |
| ENSG00000139644 | <b>TMBIM6</b>   | 349.10  | 644.92 | 1.85   | 7.00E-04 | 2.4  | 364.67  | 594.46 | 1.63   | 5.00E-04 | 2.1   |
| ENSG00000106565 | <b>TMEM176B</b> | 729.37  | 4.81   | 0.01   | 8.81E-09 | 5.7  | 828.05  | 1.65   | 0.00   | 3.93E-07 | 1.8   |
| ENSG00000109084 | <b>TMEM97</b>   | 39.46   | 195.66 | 4.96   | NS       | 1.5  | 44.19   | 148.19 | 3.35   | NS       | 1.0   |
| ENSG00000067182 | <b>TNFRSF1A</b> | 27.88   | 180.71 | 6.48   | NS       | 6.3  | 20.46   | 154.69 | 7.56   | NS       | 4.7   |
| ENSG00000169902 | <b>TPST1</b>    | 7.14    | 17.53  | 2.46   | 5.40E-03 | 1.4  | 6.00    | 27.33  | 4.55   | NS       | 2.3   |
| ENSG00000109814 | <b>UGDH</b>     | 15.02   | 58.13  | 3.87   | NS       | 1.0  | 19.49   | 53.10  | 2.72   | NS       | 0.9   |
| ENSG00000100024 | <b>UPB1</b>     | 118.60  | 0.03   | 0.00   | 2.01E-07 | 0.4  | 148.34  | 1.37   | 0.01   | 0.00E+00 | 28.2  |
| ENSG00000183696 | <b>UPP1</b>     | 2.59    | 255.02 | 98.37  | 2.38E-06 | 14.1 | 2.26    | 124.64 | 55.25  | 1.10E-03 | 7.3   |
| ENSG00000109072 | <b>VTN</b>      | 3720.59 | 5.33   | 0.00   | 1.61E-08 | 23.5 | 3437.38 | 69.82  | 0.02   | 3.10E-08 | 91.4  |
| ENSG00000158125 | <b>XDH</b>      | 26.51   | 5.50   | 0.21   | 8.28E-06 | 5.5  | 33.67   | 0.86   | 0.03   | 0.00E+00 | 2.8   |

### Hallmark Bile Acid Metabolism

|                 |              |        |       |       |          |     |        |       |       |          |      |
|-----------------|--------------|--------|-------|-------|----------|-----|--------|-------|-------|----------|------|
| ENSG00000165029 | <b>ABCA1</b> | 16.96  | 15.04 | 0.89  | 1.60E-03 | 1.5 | 10.22  | 88.06 | 8.62  | NS       | 11.7 |
| ENSG00000107331 | <b>ABCA2</b> | 10.88  | 1.14  | 0.10  | 3.72E-07 | 0.2 | 9.70   | 5.46  | 0.56  | 3.00E-04 | 0.9  |
| ENSG00000167972 | <b>ABCA3</b> | 0.57   | 2.61  | 4.56  | NS       | 1.5 | 0.35   | 8.58  | 24.33 | NS       | 1.4  |
| ENSG00000198691 | <b>ABCA4</b> | 0.24   | 2.46  | 10.06 | NS       | 5.5 | 0.13   | 2.69  | 19.96 | NS       | 23.0 |
| ENSG00000154265 | <b>ABCA5</b> | 10.80  | 7.14  | 0.66  | 0.00E+00 | 7.3 | 13.18  | 5.60  | 0.42  | 1.00E-04 | 6.1  |
| ENSG00000154262 | <b>ABCA6</b> | 14.15  | 0.08  | 0.01  | 5.68E-07 | 0.0 | 11.88  | 0.04  | 0.00  | 3.40E-07 | 3.0  |
| ENSG00000141338 | <b>ABCA8</b> | 12.34  | 0.06  | 0.00  | 0.00E+00 | 0.0 | 13.25  | 0.19  | 0.01  | 8.73E-08 | 20.9 |
| ENSG00000154258 | <b>ABCA9</b> | 11.45  | 0.22  | 0.02  | 1.07E-07 | 5.6 | 6.61   | 0.14  | 0.02  | 8.91E-07 | 1.7  |
| ENSG00000101986 | <b>ABCD1</b> | 4.18   | 11.78 | 2.82  | NS       | 1.9 | 3.65   | 9.76  | 2.68  | NS       | 2.2  |
| ENSG00000173208 | <b>ABCD2</b> | 0.06   | 0.00  | 0.00  | 4.00E-04 | 0.6 | 0.02   | 0.30  | 14.80 | NS       | 11.2 |
| ENSG00000117528 | <b>ABCD3</b> | 22.77  | 24.28 | 1.07  | 1.00E-04 | 1.6 | 32.27  | 47.05 | 1.46  | 2.10E-03 | 3.0  |
| ENSG00000172350 | <b>ABCG4</b> | 0.04   | 0.06  | 1.40  | NS       | 1.0 | 0.02   | 0.18  | 10.78 | NS       | 0.2  |
| ENSG00000143921 | <b>ABCG8</b> | 65.92  | 0.00  | 0.00  | 1.60E-09 | 0.0 | 52.70  | 0.02  | 0.00  | 1.81E-08 | 0.2  |
| ENSG00000151726 | <b>ACSL1</b> | 256.41 | 56.13 | 0.22  | 0.00E+00 | 8.0 | 291.26 | 48.01 | 0.16  | 0.00E+00 | 4.7  |

|                 |         |          |       |       |          |         |         |        |         |          |       |
|-----------------|---------|----------|-------|-------|----------|---------|---------|--------|---------|----------|-------|
| ENSG00000197142 | ACSL5   | 54.68    | 11.74 | 0.21  | 5.15E-07 | #DIV/0! | 65.06   | 4.67   | 0.07    | 4.00E-04 | 150.9 |
| ENSG00000172482 | AGXT    | 943.53   | 0.00  | 0.00  | 3.34E-10 | 0.0     | 952.18  | 0.36   | 0.00    | 2.82E-09 | 2.0   |
| ENSG00000122787 | AKRID1  | 106.72   | 0.34  | 0.00  | 1.33E-06 | 2.4     | 150.69  | 6.09   | 0.04    | 3.04E-06 | 40.4  |
| ENSG00000165092 | ALDH1A1 | 346.80   | 1.14  | 0.00  | 5.24E-08 | 1.4     | 425.78  | 393.98 | 0.93    | NS       | 290.7 |
| ENSG00000118514 | ALDH8A1 | 120.95   | 1.05  | 0.01  | 1.02E-08 | 5.7     | 117.98  | 0.88   | 0.01    | 2.59E-08 | 4.5   |
| ENSG00000143149 | ALDH9A1 | 80.16    | 75.13 | 0.94  | 0.00E+00 | 0.9     | 89.10   | 72.28  | 0.81    | 0.00E+00 | 0.8   |
| ENSG00000242110 | AMACR   | 44.64    | 10.09 | 0.23  | 1.61E-06 | 1.6     | 45.75   | 16.47  | 0.36    | 5.84E-06 | 2.3   |
| ENSG00000118137 | APOA1   | 11000.82 | 13.80 | 0.00  | 1.39E-07 | 21.7    | 8593.47 | 899.42 | 0.10    | 1.00E-04 | 429.3 |
| ENSG00000103569 | AQP9    | 294.35   | 0.00  | 0.00  | 3.18E-10 | 0.0     | 292.75  | 0.08   | 0.00    | 4.07E-09 | 1.3   |
| ENSG00000169083 | AR      | 15.33    | 0.43  | 0.03  | 4.30E-06 | 0.1     | 17.91   | 0.64   | 0.04    | 3.20E-06 | 0.1   |
| ENSG00000124788 | ATXN1   | 2.42     | 23.51 | 9.70  | NS       | 8.1     | 2.56    | 11.88  | 4.65    | NS       | 34.9  |
| ENSG00000129151 | BBOX1   | 37.01    | 0.08  | 0.00  | 1.69E-07 | 0.0     | 24.18   | 0.19   | 0.01    | 6.81E-07 | 4.6   |
| ENSG00000137936 | BCAR3   | 3.31     | 77.63 | 23.47 | 2.00E-04 | 11.6    | 3.16    | 34.39  | 10.87   | NS       | 4.8   |
| ENSG00000153162 | BMP6    | 0.72     | 0.66  | 0.91  | NS       | 0.9     | 0.20    | 103.67 | 531.46  | NS       | 67.6  |
| ENSG00000121691 | CAT     | 341.00   | 10.86 | 0.03  | 1.54E-07 | 0.9     | 400.58  | 21.17  | 0.05    | 5.49E-07 | 1.5   |
| ENSG00000138135 | CH25H   | 0.19     | 0.00  | 0.00  | 4.00E-04 | 0.9     | 0.06    | 0.05   | 0.83    | 1.90E-03 | 0.1   |
| ENSG00000005469 | CROT    | 7.03     | 5.81  | 0.83  | 1.00E-04 | 1.8     | 9.36    | 15.57  | 1.66    | 5.00E-03 | 5.3   |
| ENSG00000135929 | CYP27A1 | 303.83   | 6.18  | 0.02  | 2.50E-08 | 1.0     | 374.56  | 19.40  | 0.05    | 8.89E-07 | 4.8   |
| ENSG00000146233 | CYP39A1 | 31.29    | 0.61  | 0.02  | 3.71E-07 | 0.4     | 24.01   | 0.92   | 0.04    | 4.43E-07 | 0.7   |
| ENSG00000036530 | CYP46A1 | 0.49     | 0.62  | 1.25  | 7.70E-03 | 0.9     | 0.59    | 0.72   | 1.23    | NS       | 1.5   |
| ENSG00000167910 | CYP7A1  | 7.47     | 0.13  | 0.02  | 1.76E-06 | 0.0     | 6.67    | 0.01   | 0.00    | 5.91E-07 | 1.3   |
| ENSG00000172817 | CYP7B1  | 2.36     | 5.42  | 2.29  | NS       | 2.1     | 2.76    | 6.99   | 2.53    | NS       | 14.2  |
| ENSG00000180432 | CYP8B1  | 234.07   | 0.00  | 0.00  | 1.84E-10 | 0.0     | 194.32  | 0.11   | 0.00    | 4.09E-09 | 1.1   |
| ENSG00000116133 | DHCR24  | 379.13   | 61.59 | 0.16  | 2.34E-07 | 0.1     | 418.13  | 179.28 | 0.43    | 1.00E-04 | 0.3   |
| ENSG00000211452 | DIO1    | 116.20   | 0.17  | 0.00  | 5.87E-09 | 1.1     | 97.45   | 3.55   | 0.04    | 2.45E-06 | 12.9  |
| ENSG00000211448 | DIO2    | 0.00     | 0.28  | 85.76 | 1.20E-03 | 2.3     | 0.00    | 6.65   | 2388.71 | 9.00E-04 | 32.1  |
| ENSG00000096093 | EFHC1   | 2.31     | 12.02 | 5.20  | NS       | 2.0     | 2.60    | 12.82  | 4.93    | NS       | 1.4   |
| ENSG00000120915 | EPHX2   | 89.31    | 1.23  | 0.01  | 1.37E-07 | 0.3     | 100.87  | 4.30   | 0.04    | 8.65E-08 | 0.8   |
| ENSG00000149485 | FADS1   | 15.97    | 16.31 | 1.02  | NS       | 1.0     | 12.07   | 46.72  | 3.87    | NS       | 0.5   |
| ENSG00000134824 | FADS2   | 35.62    | 10.14 | 0.28  | 1.30E-03 | 0.1     | 29.15   | 45.89  | 1.57    | NS       | 0.2   |
| ENSG00000161513 | FDXR    | 7.40     | 26.51 | 3.58  | NS       | 2.1     | 4.26    | 39.61  | 9.30    | NS       | 3.2   |
| ENSG00000145321 | GC      | 2359.12  | 0.00  | 0.00  | 8.36E-10 | 0.0     | 2207.74 | 0.55   | 0.00    | 1.10E-08 | 0.8   |
| ENSG00000023909 | GLCLM   | 8.19     | 82.35 | 10.05 | NS       | 5.4     | 7.58    | 97.64  | 12.89   | NS       | 7.4   |

|                 |                 |        |        |        |          |      |        |        |         |          |         |
|-----------------|-----------------|--------|--------|--------|----------|------|--------|--------|---------|----------|---------|
| ENSG00000124713 | <b>GNMT</b>     | 219.19 | 0.99   | 0.00   | 3.64E-08 | 0.4  | 218.39 | 0.98   | 0.00    | 8.88E-08 | 0.4     |
| ENSG00000116906 | <b>GNPAT</b>    | 15.97  | 61.23  | 3.83   | NS       | 1.7  | 15.99  | 70.84  | 4.43    | NS       | 1.2     |
| ENSG00000197448 | <b>GSTK1</b>    | 93.68  | 41.79  | 0.45   | 5.26E-06 | 3.8  | 90.10  | 49.25  | 0.55    | 0.00E+00 | 4.2     |
| ENSG00000131373 | <b>HACL1</b>    | 11.69  | 18.16  | 1.55   | 7.00E-04 | 0.5  | 18.49  | 26.67  | 1.44    | 2.90E-03 | 0.5     |
| ENSG00000101323 | <b>HAO1</b>     | 346.96 | 0.00   | 0.00   | 2.23E-10 | 0.0  | 337.73 | 0.03   | 0.00    | 5.12E-09 | #DIV/0! |
| ENSG00000198189 | <b>HSD17B11</b> | 80.42  | 22.96  | 0.29   | 0.00E+00 | 2.1  | 62.49  | 44.90  | 0.72    | 1.00E-04 | 3.6     |
| ENSG00000133835 | <b>HSD17B4</b>  | 51.12  | 25.51  | 0.50   | 6.27E-06 | 0.3  | 63.61  | 45.17  | 0.71    | 0.00E+00 | 0.4     |
| ENSG00000025423 | <b>HSD17B6</b>  | 581.14 | 1.49   | 0.00   | 3.30E-09 | 0.3  | 725.95 | 1.78   | 0.00    | 5.87E-09 | 0.4     |
| ENSG00000203857 | <b>HSD3B1</b>   | 0.70   | 89.26  | 127.59 | 5.00E-04 | 80.0 | 0.09   | 151.81 | 1778.03 | NS       | 11453.5 |
| ENSG00000099377 | <b>HSD3B7</b>   | 42.16  | 6.63   | 0.16   | 1.00E-06 | 1.3  | 42.13  | 6.76   | 0.16    | 1.49E-06 | 1.6     |
| ENSG00000138413 | <b>IDH1</b>     | 130.12 | 76.64  | 0.59   | 8.11E-06 | 0.3  | 125.10 | 176.61 | 1.41    | 1.20E-03 | 0.5     |
| ENSG00000182054 | <b>IDH2</b>     | 147.13 | 60.03  | 0.41   | 3.00E-04 | 1.0  | 62.77  | 63.12  | 1.01    | 3.00E-04 | 1.0     |
| ENSG00000067064 | <b>IDI1</b>     | 28.99  | 28.70  | 0.99   | 2.00E-04 | 0.3  | 58.11  | 47.73  | 0.82    | 2.20E-03 | 0.5     |
| ENSG00000066583 | <b>ISOC1</b>    | 43.83  | 61.62  | 1.41   | 1.00E-04 | 1.2  | 44.48  | 57.50  | 1.29    | 2.00E-04 | 1.2     |
| ENSG00000105610 | <b>KLF1</b>     | 0.14   | 0.10   | 0.72   | NS       | 1.3  | 0.04   | 0.17   | 4.21    | NS       | 0.3     |
| ENSG00000182866 | <b>LCK</b>      | 2.38   | 0.09   | 0.04   | 0.00E+00 | 0.9  | 0.66   | 0.05   | 0.08    | 0.00E+00 | 0.0     |
| ENSG00000079435 | <b>LIPE</b>     | 0.21   | 1.41   | 6.68   | NS       | 1.6  | 0.09   | 1.44   | 16.32   | NS       | 0.5     |
| ENSG00000102910 | <b>LONP2</b>    | 32.25  | 30.58  | 0.95   | 0.00E+00 | 3.0  | 41.68  | 34.48  | 0.83    | 1.00E-04 | 3.6     |
| ENSG00000103150 | <b>MLYCD</b>    | 4.14   | 2.53   | 0.61   | 5.56E-06 | 0.9  | 4.71   | 2.87   | 0.61    | 0.00E+00 | 1.1     |
| ENSG00000069869 | <b>NEDD4</b>    | 4.23   | 50.09  | 11.83  | NS       | 8.8  | 5.03   | 46.84  | 9.31    | NS       | 21.9    |
| ENSG00000141458 | <b>NPC1</b>     | 1.47   | 52.94  | 35.91  | 7.00E-04 | 4.2  | 1.57   | 60.55  | 38.59   | 7.00E-04 | 3.4     |
| ENSG00000131910 | <b>NR0B2</b>    | 109.38 | 0.00   | 0.00   | 8.13E-07 | 0.0  | 66.45  | 0.00   | 0.00    | 7.58E-07 | #DIV/0! |
| ENSG0000012504  | <b>NR1H4</b>    | 34.61  | 0.01   | 0.00   | 1.28E-08 | 0.0  | 33.22  | 0.01   | 0.00    | 1.91E-08 | 0.7     |
| ENSG00000144852 | <b>NR1I2</b>    | 57.81  | 0.01   | 0.00   | 1.51E-08 | 0.0  | 69.81  | 0.21   | 0.00    | 7.22E-07 | 0.3     |
| ENSG00000151623 | <b>NR3C2</b>    | 2.41   | 0.46   | 0.19   | 0.00E+00 | 0.6  | 2.45   | 1.90   | 0.77    | 1.50E-03 | 3.9     |
| ENSG00000112874 | <b>NUDT12</b>   | 7.49   | 17.43  | 2.33   | 2.50E-03 | 1.4  | 8.95   | 22.42  | 2.50    | 8.10E-03 | 1.5     |
| ENSG00000123240 | <b>OPTN</b>     | 26.13  | 125.47 | 4.80   | NS       | 3.8  | 18.74  | 97.75  | 5.22    | NS       | 10.0    |
| ENSG00000148832 | <b>PAOX</b>     | 10.27  | 6.69   | 0.65   | 1.00E-04 | 2.0  | 12.52  | 5.47   | 0.44    | 1.00E-04 | 1.5     |
| ENSG00000115425 | <b>PECR</b>     | 55.56  | 4.17   | 0.08   | 6.85E-08 | 0.5  | 56.85  | 6.68   | 0.12    | 8.24E-07 | 0.8     |
| ENSG00000127980 | <b>PEX1</b>     | 3.47   | 16.88  | 4.87   | NS       | 1.6  | 3.30   | 17.53  | 5.32    | NS       | 1.1     |
| ENSG00000166821 | <b>PEX11A</b>   | 12.81  | 6.17   | 0.48   | 3.03E-06 | 2.6  | 15.87  | 7.70   | 0.48    | 0.00E+00 | 2.8     |
| ENSG00000104883 | <b>PEX11G</b>   | 11.82  | 5.02   | 0.42   | 1.00E-04 | 2.4  | 12.99  | 3.40   | 0.26    | 1.00E-04 | 1.9     |
| ENSG00000108733 | <b>PEX12</b>    | 3.89   | 10.75  | 2.76   | 5.10E-03 | 1.9  | 3.94   | 11.92  | 3.02    | NS       | 3.4     |



|                 |          |         |        |       |          |      |         |        |        |          |         |
|-----------------|----------|---------|--------|-------|----------|------|---------|--------|--------|----------|---------|
| ENSG00000162928 | PEX13    | 6.65    | 22.53  | 3.39  | NS       | 2.0  | 6.59    | 23.05  | 3.50   | NS       | 1.9     |
| ENSG00000121680 | PEX16    | 14.11   | 17.81  | 1.26  | 3.20E-03 | 1.1  | 15.83   | 16.57  | 1.05   | 2.20E-03 | 1.5     |
| ENSG00000162735 | PEX19    | 29.35   | 50.66  | 1.73  | 5.00E-04 | 1.2  | 32.92   | 56.32  | 1.71   | 9.00E-04 | 0.8     |
| ENSG00000215193 | PEX26    | 2.75    | 10.38  | 3.77  | NS       | 1.6  | 2.44    | 11.65  | 4.78   | NS       | 1.1     |
| ENSG00000124587 | PEX6     | 11.90   | 14.56  | 1.22  | 1.00E-04 | 2.6  | 12.10   | 22.53  | 1.86   | 7.00E-04 | 2.2     |
| ENSG00000112357 | PEX7     | 4.74    | 10.97  | 2.32  | 6.00E-03 | 1.4  | 4.72    | 11.50  | 2.44   | 9.50E-03 | 1.0     |
| ENSG00000152556 | PFKM     | 2.38    | 16.44  | 6.91  | 7.60E-03 | 1.2  | 1.58    | 27.10  | 17.18  | 1.10E-03 | 0.6     |
| ENSG00000107537 | PHYH     | 202.87  | 25.58  | 0.13  | 9.82E-07 | 2.0  | 216.53  | 28.19  | 0.13   | 2.26E-06 | 2.1     |
| ENSG00000179761 | PIPOX    | 180.84  | 0.36   | 0.00  | 5.71E-09 | 0.0  | 157.03  | 0.89   | 0.01   | 5.39E-08 | 0.0     |
| ENSG00000135241 | PNPLA8   | 4.72    | 38.15  | 8.09  | NS       | 4.0  | 4.52    | 39.67  | 8.77   | NS       | 4.7     |
| ENSG00000126432 | PRDX5    | 184.20  | 521.41 | 2.83  | NS       | 1.5  | 220.45  | 590.59 | 2.68   | NS       | 1.5     |
| ENSG00000176894 | PXMP2    | 132.71  | 20.71  | 0.16  | 7.44E-07 | 1.7  | 142.84  | 22.53  | 0.16   | 1.15E-06 | 2.1     |
| ENSG00000114115 | RBP1     | 13.72   | 75.28  | 5.49  | NS       | 3.3  | 5.45    | 30.98  | 5.69   | NS       | 2.6     |
| ENSG00000042445 | RETSAT   | 49.45   | 20.76  | 0.42  | 4.92E-06 | 1.8  | 55.79   | 39.89  | 0.71   | 1.00E-04 | 3.1     |
| ENSG00000186350 | RXRA     | 37.87   | 17.85  | 0.47  | 8.40E-06 | 1.7  | 47.92   | 24.39  | 0.51   | 0.00E+00 | 1.9     |
| ENSG00000143171 | RXRG     | 0.14    | 0.01   | 0.10  | 6.00E-04 | 0.1  | 0.07    | 0.15   | 2.08   | NS       | 1.5     |
| ENSG00000116171 | SCP2     | 129.48  | 21.53  | 0.17  | 1.41E-06 | 1.7  | 122.10  | 26.00  | 0.21   | 2.51E-06 | 2.1     |
| ENSG00000170099 | SERPINA6 | 213.87  | 0.04   | 0.00  | 7.70E-10 | 0.0  | 167.78  | 0.14   | 0.00   | 7.24E-09 | 2.6     |
| ENSG00000110628 | SLC22A18 | 7.43    | 4.03   | 0.54  | 9.79E-06 | 10.8 | 7.55    | 7.81   | 1.04   | 2.00E-04 | 12.8    |
| ENSG00000170482 | SLC23A1  | 12.02   | 0.11   | 0.01  | 2.35E-07 | 0.0  | 15.55   | 0.39   | 0.02   | 2.71E-07 | #DIV/0! |
| ENSG00000089057 | SLC23A2  | 20.70   | 86.00  | 4.16  | NS       | 2.5  | 33.84   | 66.50  | 1.96   | NS       | 3.3     |
| ENSG00000140284 | SLC27A2  | 110.22  | 1.38   | 0.01  | 2.08E-08 | 0.1  | 111.65  | 11.67  | 0.10   | 1.85E-06 | 0.8     |
| ENSG00000083807 | SLC27A5  | 161.74  | 0.48   | 0.00  | 8.08E-09 | 0.2  | 186.96  | 0.99   | 0.01   | 1.96E-08 | 0.2     |
| ENSG00000112759 | SLC29A1  | 56.74   | 75.46  | 1.33  | 8.60E-03 | 1.1  | 52.36   | 115.34 | 2.20   | NS       | 0.5     |
| ENSG00000157593 | SLC35B2  | 20.46   | 85.97  | 4.20  | NS       | 2.0  | 17.70   | 98.59  | 5.57   | NS       | 2.3     |
| ENSG00000084453 | SLCO1A2  | 0.18    | 0.76   | 4.26  | NS       | 1.1  | 0.35    | 0.40   | 1.13   | NS       | 0.3     |
| ENSG00000167780 | SOAT2    | 2.16    | 0.15   | 0.07  | 6.00E-04 | 1.6  | 4.98    | 4.94   | 0.99   | NS       | 311.9   |
| ENSG00000142168 | SOD1     | 416.76  | 112.95 | 0.27  | 4.32E-06 | 0.8  | 569.21  | 148.84 | 0.26   | 9.53E-06 | 0.9     |
| ENSG00000173597 | SULT1B1  | 3.39    | 0.08   | 0.02  | 5.43E-06 | 0.0  | 3.60    | 0.93   | 0.26   | 2.00E-04 | 102.8   |
| ENSG00000088002 | SULT2B1  | 0.11    | 0.12   | 1.07  | NS       | 1.0  | 0.02    | 0.09   | 4.28   | NS       | 0.2     |
| ENSG00000115112 | TFCP2L1  | 0.16    | 10.55  | 67.49 | 2.30E-03 | 5.6  | 0.04    | 9.15   | 256.82 | 3.30E-03 | 4.9     |
| ENSG00000118271 | TTR      | 3202.86 | 5.69   | 0.00  | 2.59E-07 | 7.9  | 3471.91 | 404.78 | 0.12   | 0.00E+00 | 501.0   |

## Hallmark Fatty Acid Metabolism

|                 |         |        |        |       |          |         |        |        |        |          |       |
|-----------------|---------|--------|--------|-------|----------|---------|--------|--------|--------|----------|-------|
| ENSG00000109576 | AADAT   | 36.78  | 12.74  | 0.35  | 8.34E-07 | 1.1     | 34.48  | 24.07  | 0.70   | 9.60E-06 | 2.0   |
| ENSG00000060971 | ACAA1   | 102.67 | 22.99  | 0.22  | 2.50E-06 | 2.3     | 182.69 | 53.93  | 0.30   | 1.00E-04 | 5.6   |
| ENSG00000167315 | ACAA2   | 164.36 | 54.06  | 0.33  | 3.70E-06 | 0.8     | 209.38 | 71.71  | 0.34   | 9.71E-06 | 0.9   |
| ENSG00000115361 | ACADL   | 12.51  | 5.11   | 0.41  | 1.42E-06 | 27.9    | 11.90  | 12.63  | 1.06   | 9.00E-04 | 52.0  |
| ENSG00000117054 | ACADM   | 50.53  | 30.87  | 0.61  | 0.00E+00 | 0.8     | 51.62  | 43.00  | 0.83   | 1.00E-04 | 1.1   |
| ENSG00000122971 | ACADS   | 111.56 | 14.42  | 0.13  | 2.77E-07 | 2.7     | 119.35 | 11.09  | 0.09   | 7.99E-07 | 2.2   |
| ENSG00000072778 | ACADV1  | 276.00 | 245.76 | 0.89  | 3.20E-03 | 4.7     | 365.27 | 136.33 | 0.37   | 1.70E-03 | 2.5   |
| ENSG00000120437 | ACAT2   | 28.37  | 24.15  | 0.85  | 3.00E-04 | 0.2     | 50.99  | 45.02  | 0.88   | 5.40E-03 | 0.3   |
| ENSG00000100412 | ACO2    | 27.97  | 74.05  | 2.65  | 8.80E-03 | 1.2     | 22.70  | 108.94 | 4.80   | NS       | 1.6   |
| ENSG00000119673 | ACOT2   | 46.24  | 7.14   | 0.15  | 0.00E+00 | 1.1     | 69.82  | 8.52   | 0.12   | 0.00E+00 | 1.0   |
| ENSG00000101473 | ACOT8   | 5.05   | 9.15   | 1.81  | 8.00E-04 | 0.8     | 5.71   | 10.61  | 1.86   | 2.40E-03 | 1.0   |
| ENSG00000161533 | ACOX1   | 55.87  | 17.86  | 0.32  | 7.51E-07 | 1.9     | 57.78  | 23.32  | 0.40   | 2.60E-06 | 2.8   |
| ENSG00000151726 | ACSL1   | 256.41 | 56.13  | 0.22  | 0.00E+00 | 8.0     | 291.26 | 48.01  | 0.16   | 0.00E+00 | 4.7   |
| ENSG00000068366 | ACSL4   | 2.51   | 57.27  | 22.80 | NS       | 1.2     | 0.29   | 28.64  | 100.10 | NS       | 0.7   |
| ENSG00000197142 | ACSL5   | 54.68  | 11.74  | 0.21  | 5.15E-07 | #DIV/0! | 65.06  | 4.67   | 0.07   | 4.00E-04 | 150.9 |
| ENSG00000005187 | ACSM3   | 10.16  | 6.51   | 0.64  | 3.00E-04 | 6.4     | 23.54  | 5.29   | 0.22   | 2.00E-04 | 3.8   |
| ENSG00000154930 | ACSS1   | 1.56   | 0.17   | 0.11  | 0.00E+00 | 0.1     | 0.60   | 1.24   | 2.07   | 1.00E-02 | 1.6   |
| ENSG00000248144 | ADH1C   | 944.48 | 0.00   | 0.00  | 1.11E-10 | #DIV/0! | 892.47 | 0.33   | 0.00   | 3.44E-09 | 2.3   |
| ENSG00000196344 | ADH7    | 0.21   | 0.00   | 0.00  | 1.54E-07 | #DIV/0! | 0.17   | 0.00   | 0.00   | 3.72E-07 | 0.0   |
| ENSG00000006831 | ADIPOR2 | 31.60  | 58.78  | 1.86  | 5.00E-04 | 1.7     | 39.29  | 57.87  | 1.47   | 5.00E-04 | 1.6   |
| ENSG00000239900 | ADSL    | 5.88   | 31.83  | 5.41  | NS       | 0.4     | 5.90   | 37.72  | 6.40   | NS       | 0.4   |
| ENSG00000148218 | ALAD    | 101.27 | 15.88  | 0.16  | 2.23E-07 | 1.7     | 114.46 | 24.47  | 0.21   | 7.73E-07 | 2.6   |
| ENSG00000165092 | ALDH1A1 | 346.80 | 1.14   | 0.00  | 5.24E-08 | 1.4     | 425.78 | 393.98 | 0.93   | NS       | 290.7 |
| ENSG00000108602 | ALDH3A1 | 0.17   | 0.09   | 0.56  | 8.00E-03 | 0.5     | 0.35   | 0.10   | 0.29   | 4.50E-03 | 0.6   |
| ENSG00000072210 | ALDH3A2 | 60.13  | 12.01  | 0.20  | 1.56E-06 | 0.3     | 89.82  | 46.49  | 0.52   | 3.00E-04 | 1.4   |
| ENSG00000143149 | ALDH9A1 | 80.16  | 75.13  | 0.94  | 0.00E+00 | 0.9     | 89.10  | 72.28  | 0.81   | 0.00E+00 | 0.8   |
| ENSG00000149925 | ALDOA   | 15.46  | 301.59 | 19.51 | 0.00E+00 | 1.0     | 12.04  | 262.38 | 21.80  | 2.00E-04 | 0.9   |
| ENSG00000131471 | AOC3    | 5.36   | 2.31   | 0.43  | 1.00E-04 | 2.3     | 3.22   | 1.54   | 0.48   | 0.00E+00 | 1.1   |
| ENSG00000100823 | APEX1   | 60.52  | 220.08 | 3.64  | NS       | 0.5     | 67.71  | 331.55 | 4.90   | NS       | 0.5   |
| ENSG00000165269 | AQP7    | 14.29  | 0.05   | 0.00  | 3.42E-07 | 1.2     | 12.42  | 0.47   | 0.04   | 6.28E-06 | 15.0  |
| ENSG00000148090 | AUH     | 9.81   | 23.76  | 2.42  | 2.80E-03 | 1.3     | 9.00   | 18.76  | 2.09   | 3.30E-03 | 1.1   |
| ENSG00000083123 | BCKDHB  | 19.92  | 17.94  | 0.90  | 1.00E-04 | 1.0     | 20.99  | 19.84  | 0.95   | 2.00E-04 | 1.0   |
| ENSG00000106605 | BLVRA   | 2.48   | 21.85  | 8.81  | NS       | 0.6     | 0.87   | 18.69  | 21.47  | NS       | 0.6   |

|                 |                |        |        |       |          |      |        |        |        |          |      |
|-----------------|----------------|--------|--------|-------|----------|------|--------|--------|--------|----------|------|
| ENSG00000138696 | <b>BMPRI1B</b> | 0.21   | 1.85   | 8.71  | 5.60E-03 | 3.9  | 0.14   | 4.34   | 30.53  | NS       | 4.3  |
| ENSG00000137274 | <b>BPHL</b>    | 43.37  | 12.37  | 0.29  | 0.00E+00 | 0.9  | 49.15  | 12.70  | 0.26   | 0.00E+00 | 0.9  |
| ENSG00000104267 | <b>CA2</b>     | 61.14  | 8.06   | 0.13  | 2.07E-06 | 0.7  | 69.17  | 28.19  | 0.41   | 1.00E-04 | 3.4  |
| ENSG00000167434 | <b>CA4</b>     | 0.03   | 0.80   | 26.43 | 7.00E-04 | 0.3  | 0.03   | 6.19   | 239.88 | 0.00E+00 | 3.4  |
| ENSG00000159228 | <b>CBR1</b>    | 106.87 | 28.48  | 0.27  | 4.13E-06 | 0.3  | 130.30 | 24.05  | 0.18   | 2.25E-06 | 0.3  |
| ENSG00000159231 | <b>CBR3</b>    | 0.31   | 2.62   | 8.35  | NS       | 0.5  | 0.54   | 2.73   | 5.09   | NS       | 0.8  |
| ENSG00000160124 | <b>CCDC58</b>  | 11.79  | 26.20  | 2.22  | NS       | 0.6  | 9.87   | 33.14  | 3.36   | NS       | 0.8  |
| ENSG00000158473 | <b>CD1D</b>    | 16.34  | 0.26   | 0.02  | 8.69E-07 | 0.1  | 14.16  | 0.72   | 0.05   | 4.82E-06 | 0.3  |
| ENSG00000135218 | <b>CD36</b>    | 3.83   | 0.01   | 0.00  | 1.93E-06 | 0.0  | 4.19   | 0.11   | 0.03   | 0.00E+00 | 0.3  |
| ENSG00000170835 | <b>CEL</b>     | 1.40   | 2.45   | 1.74  | NS       | 1.3  | 1.10   | 12.62  | 11.50  | NS       | 5.0  |
| ENSG00000080819 | <b>CPOX</b>    | 16.64  | 43.41  | 2.61  | 3.30E-03 | 1.6  | 22.58  | 40.24  | 1.78   | 3.40E-03 | 1.4  |
| ENSG00000110090 | <b>CPT1A</b>   | 13.01  | 33.13  | 2.55  | NS       | 8.8  | 18.15  | 13.12  | 0.72   | 7.00E-04 | 3.7  |
| ENSG00000157184 | <b>CPT2</b>    | 39.48  | 19.74  | 0.50  | 6.90E-06 | 0.6  | 31.01  | 20.91  | 0.67   | 0.00E+00 | 0.7  |
| ENSG00000095321 | <b>CRAT</b>    | 66.79  | 17.71  | 0.27  | 1.34E-06 | 1.9  | 76.38  | 17.51  | 0.23   | 2.34E-06 | 1.8  |
| ENSG00000116791 | <b>CRYZ</b>    | 55.88  | 39.26  | 0.70  | 0.00E+00 | 1.3  | 52.36  | 25.01  | 0.48   | 1.00E-04 | 1.3  |
| ENSG00000140465 | <b>CYP1A1</b>  | 4.46   | 14.33  | 3.21  | NS       | 25.6 | 21.25  | 34.58  | 1.63   | NS       | 42.8 |
| ENSG00000187048 | <b>CYP4A11</b> | 419.96 | 0.00   | 0.00  | 2.12E-10 | 0.0  | 555.30 | 0.11   | 0.00   | 2.03E-09 | 1.2  |
| ENSG00000162365 | <b>CYP4A22</b> | 187.60 | 0.00   | 0.00  | 2.93E-10 | 0.0  | 188.06 | 0.07   | 0.00   | 1.30E-09 | 1.3  |
| ENSG00000180902 | <b>D2HGDH</b>  | 37.09  | 6.90   | 0.19  | 2.30E-03 | 1.5  | 47.17  | 9.84   | 0.21   | 3.90E-03 | 1.6  |
| ENSG00000104325 | <b>DECRI</b>   | 110.40 | 12.49  | 0.11  | 2.25E-07 | 0.6  | 82.53  | 14.53  | 0.18   | 6.47E-07 | 0.8  |
| ENSG00000116133 | <b>DHCR24</b>  | 379.13 | 61.59  | 0.16  | 2.34E-07 | 0.1  | 418.13 | 179.28 | 0.43   | 1.00E-04 | 0.3  |
| ENSG00000091140 | <b>DLD</b>     | 18.16  | 68.13  | 3.75  | NS       | 1.3  | 18.15  | 69.14  | 3.81   | NS       | 1.2  |
| ENSG00000119689 | <b>DLST</b>    | 22.97  | 105.59 | 4.60  | NS       | 1.5  | 23.34  | 131.37 | 5.63   | NS       | 1.3  |
| ENSG00000104823 | <b>ECH1</b>    | 172.35 | 52.06  | 0.30  | 4.18E-06 | 0.7  | 215.23 | 70.43  | 0.33   | 0.00E+00 | 0.8  |
| ENSG00000127884 | <b>ECHS1</b>   | 768.10 | 128.10 | 0.17  | 1.59E-06 | 0.8  | 763.36 | 172.03 | 0.23   | 5.05E-06 | 1.0  |
| ENSG00000167969 | <b>ECI1</b>    | 35.29  | 62.63  | 1.77  | 1.20E-03 | 2.3  | 37.84  | 65.78  | 1.74   | 2.10E-03 | 2.7  |
| ENSG00000198721 | <b>ECI2</b>    | 63.29  | 29.88  | 0.47  | 3.75E-06 | 0.9  | 64.61  | 31.74  | 0.49   | 7.99E-06 | 0.9  |
| ENSG00000113790 | <b>EHHADH</b>  | 139.27 | 7.80   | 0.06  | 2.61E-07 | 3.0  | 146.48 | 11.28  | 0.08   | 4.72E-07 | 5.1  |
| ENSG00000012660 | <b>ELOVL5</b>  | 24.80  | 140.67 | 5.67  | NS       | 1.0  | 27.04  | 128.98 | 4.77   | NS       | 0.9  |
| ENSG00000111674 | <b>ENO2</b>    | 1.65   | 5.52   | 3.34  | NS       | 0.1  | 0.69   | 46.60  | 67.36  | NS       | 0.8  |
| ENSG00000108515 | <b>ENO3</b>    | 109.23 | 2.28   | 0.02  | 2.70E-06 | 0.4  | 61.98  | 3.62   | 0.06   | 5.38E-06 | 0.5  |
| ENSG00000143819 | <b>EPHX1</b>   | 646.92 | 50.60  | 0.08  | 6.73E-08 | 0.9  | 700.07 | 111.99 | 0.16   | 4.84E-06 | 1.9  |
| ENSG00000089248 | <b>ERP29</b>   | 89.65  | 216.53 | 2.42  | NS       | 1.7  | 93.53  | 280.32 | 3.00   | NS       | 2.0  |

|                 |                  |        |        |       |          |       |         |         |        |          |       |
|-----------------|------------------|--------|--------|-------|----------|-------|---------|---------|--------|----------|-------|
| ENSG00000171503 | <b>ETFDH</b>     | 31.63  | 7.04   | 0.22  | 0.00E+00 | 1.1   | 31.97   | 11.69   | 0.37   | 0.00E+00 | 1.6   |
| ENSG00000163586 | <b>FABP1</b>     | 833.54 | 0.87   | 0.00  | 3.11E-08 | 32.2  | 792.69  | 2.37    | 0.00   | 2.21E-06 | 16.0  |
| ENSG00000169710 | <b>FASN</b>      | 47.98  | 71.52  | 1.49  | 9.80E-03 | 0.2   | 132.73  | 113.10  | 0.85   | NS       | 0.3   |
| ENSG00000091483 | <b>FH</b>        | 84.62  | 113.49 | 1.34  | 1.00E-04 | 1.1   | 89.92   | 106.04  | 1.18   | 1.00E-04 | 1.0   |
| ENSG00000010932 | <b>FMO1</b>      | 0.31   | 0.47   | 1.53  | NS       | 25.9  | 0.12    | 3.63    | 31.37  | 4.10E-03 | 97.7  |
| ENSG00000123689 | <b>G0S2</b>      | 51.68  | 102.15 | 1.98  | NS       | 191.4 | 63.54   | 27.10   | 0.43   | 2.00E-03 | 54.1  |
| ENSG00000139112 | <b>GABARAPL1</b> | 45.19  | 134.94 | 2.99  | NS       | 2.4   | 39.32   | 151.39  | 3.85   | NS       | 3.1   |
| ENSG00000136750 | <b>GAD2</b>      | 0.00   | 0.01   | 3.23  | NS       | 0.0   | 0.00    | 0.46    | 134.20 | NS       | 1.0   |
| ENSG00000105607 | <b>GCDH</b>      | 34.09  | 8.91   | 0.26  | 4.47E-06 | 0.3   | 28.04   | 11.27   | 0.40   | 8.92E-06 | 0.4   |
| ENSG00000135821 | <b>GLUL</b>      | 123.27 | 68.81  | 0.56  | 5.81E-06 | 0.7   | 164.94  | 90.20   | 0.55   | 0.00E+00 | 0.9   |
| ENSG00000167588 | <b>GPD1</b>      | 72.90  | 0.59   | 0.01  | 6.93E-09 | 1.3   | 82.65   | 0.92    | 0.01   | 1.65E-08 | 1.9   |
| ENSG00000115159 | <b>GPD2</b>      | 1.07   | 38.54  | 36.08 | 2.00E-04 | 1.2   | 0.70    | 46.91   | 66.77  | 2.00E-04 | 1.4   |
| ENSG00000137106 | <b>GRHPR</b>     | 123.57 | 26.69  | 0.22  | 2.11E-06 | 1.3   | 133.12  | 34.88   | 0.26   | 5.48E-06 | 1.4   |
| ENSG00000100577 | <b>GSTZ1</b>     | 24.55  | 5.45   | 0.22  | 3.19E-06 | 0.8   | 24.23   | 7.71    | 0.32   | 7.91E-06 | 0.7   |
| ENSG00000164032 | <b>H2AFZ</b>     | 15.79  | 316.89 | 20.07 | 0.00E+00 | 0.5   | 16.82   | 403.56  | 23.99  | 1.00E-04 | 0.6   |
| ENSG00000138796 | <b>HADH</b>      | 61.90  | 34.63  | 0.56  | 7.92E-06 | 0.7   | 74.19   | 28.42   | 0.38   | 0.00E+00 | 0.6   |
| ENSG00000138029 | <b>HADHB</b>     | 58.30  | 105.93 | 1.82  | 9.00E-04 | 1.9   | 63.89   | 67.51   | 1.06   | 2.00E-04 | 1.6   |
| ENSG00000116882 | <b>HAO2</b>      | 217.00 | 0.06   | 0.00  | 1.41E-09 | 0.5   | 229.60  | 1.41    | 0.01   | 6.79E-06 | 6.2   |
| ENSG00000004961 | <b>HCCS</b>      | 5.51   | 45.81  | 8.31  | NS       | 1.2   | 4.65    | 51.00   | 10.98  | NS       | 1.3   |
| ENSG00000198130 | <b>HIBCH</b>     | 20.91  | 5.32   | 0.25  | 1.99E-06 | 0.5   | 17.45   | 7.74    | 0.44   | 7.67E-06 | 0.7   |
| ENSG00000117305 | <b>HMGCL</b>     | 66.64  | 15.46  | 0.23  | 1.46E-06 | 4.0   | 62.44   | 21.53   | 0.34   | 4.92E-06 | 4.6   |
| ENSG00000112972 | <b>HMGCS1</b>    | 27.60  | 39.38  | 1.43  | 1.50E-03 | 0.2   | 95.73   | 68.95   | 0.72   | 7.00E-03 | 0.2   |
| ENSG00000134240 | <b>HMGCS2</b>    | 874.78 | 2.85   | 0.00  | 1.00E-06 | 73.8  | 1059.55 | 27.36   | 0.03   | 1.64E-07 | 133.9 |
| ENSG00000164120 | <b>HPGD</b>      | 51.60  | 14.04  | 0.27  | 0.00E+00 | 18.6  | 30.41   | 46.87   | 1.54   | 4.90E-03 | 68.2  |
| ENSG00000072506 | <b>HSD17B10</b>  | 139.49 | 95.30  | 0.68  | 0.00E+00 | 0.7   | 149.84  | 120.90  | 0.81   | 1.00E-04 | 0.8   |
| ENSG00000198189 | <b>HSD17B11</b>  | 80.42  | 22.96  | 0.29  | 0.00E+00 | 2.1   | 62.49   | 44.90   | 0.72   | 1.00E-04 | 3.6   |
| ENSG00000133835 | <b>HSD17B4</b>   | 51.12  | 25.51  | 0.50  | 6.27E-06 | 0.3   | 63.61   | 45.17   | 0.71   | 0.00E+00 | 0.4   |
| ENSG00000132196 | <b>HSD17B7</b>   | 5.40   | 5.18   | 0.96  | 2.00E-04 | 0.5   | 10.19   | 5.09    | 0.50   | 3.00E-04 | 0.8   |
| ENSG00000119471 | <b>HSDL2</b>     | 49.55  | 52.23  | 1.05  | 1.00E-04 | 2.9   | 60.67   | 82.52   | 1.36   | 4.00E-04 | 3.0   |
| ENSG00000080824 | <b>HSP90AA1</b>  | 44.35  | 711.45 | 16.04 | NS       | 1.0   | 87.59   | 1001.62 | 11.43  | NS       | 1.0   |
| ENSG00000120694 | <b>HSPH1</b>     | 4.01   | 91.95  | 22.93 | NS       | 1.2   | 7.09    | 85.66   | 12.08  | NS       | 1.0   |
| ENSG00000138413 | <b>IDH1</b>      | 130.12 | 76.64  | 0.59  | 8.11E-06 | 0.3   | 125.10  | 176.61  | 1.41   | 1.20E-03 | 0.5   |
| ENSG00000101365 | <b>IDH3B</b>     | 28.77  | 68.35  | 2.38  | NS       | 0.7   | 32.29   | 79.82   | 2.47   | NS       | 0.8   |

|                 |                 |        |        |       |          |       |        |        |       |          |      |
|-----------------|-----------------|--------|--------|-------|----------|-------|--------|--------|-------|----------|------|
| ENSG0000067829  | <b>IDH3G</b>    | 14.49  | 21.50  | 1.48  | 7.60E-03 | 0.8   | 14.65  | 29.45  | 2.01  | NS       | 1.0  |
| ENSG0000067064  | <b>IDH1</b>     | 28.99  | 28.70  | 0.99  | 2.00E-04 | 0.3   | 58.11  | 47.73  | 0.82  | 2.20E-03 | 0.5  |
| ENSG00000104951 | <b>IL4I1</b>    | 0.37   | 1.92   | 5.16  | NS       | 1.0   | 0.07   | 2.75   | 37.59 | NS       | 1.3  |
| ENSG00000241644 | <b>INMT</b>     | 9.42   | 0.35   | 0.04  | 6.12E-06 | 0.9   | 3.09   | 1.53   | 0.49  | 1.00E-04 | 3.6  |
| ENSG00000134333 | <b>LDHA</b>     | 76.76  | 111.88 | 1.46  | 2.00E-04 | 0.5   | 89.44  | 90.66  | 1.01  | 2.00E-04 | 0.4  |
| ENSG00000100097 | <b>LGALS1</b>   | 47.85  | 5.94   | 0.12  | 6.45E-06 | 0.2   | 86.85  | 4.22   | 0.05  | 4.19E-06 | 0.3  |
| ENSG00000213316 | <b>LTC4S</b>    | 1.52   | 0.98   | 0.64  | 2.10E-03 | 1.9   | 1.63   | 0.61   | 0.38  | 6.00E-04 | 1.4  |
| ENSG00000189221 | <b>MAOA</b>     | 48.58  | 2.71   | 0.06  | 5.37E-07 | 0.6   | 46.58  | 3.50   | 0.08  | 9.56E-07 | 0.7  |
| ENSG00000124370 | <b>MCCE</b>     | 14.81  | 5.91   | 0.40  | 3.37E-06 | 0.8   | 16.45  | 7.38   | 0.45  | 0.00E+00 | 1.0  |
| ENSG0000014641  | <b>MDH1</b>     | 29.38  | 72.08  | 2.45  | 2.00E-03 | 0.5   | 31.13  | 102.58 | 3.29  | NS       | 0.7  |
| ENSG00000146701 | <b>MDH2</b>     | 50.71  | 106.63 | 2.10  | 7.00E-04 | 0.7   | 49.98  | 122.38 | 2.45  | 2.80E-03 | 0.8  |
| ENSG0000065833  | <b>ME1</b>      | 3.30   | 38.69  | 11.72 | 2.50E-03 | 5.0   | 2.47   | 78.78  | 31.91 | 3.00E-04 | 10.6 |
| ENSG00000164024 | <b>METAP1</b>   | 7.83   | 76.43  | 9.76  | NS       | 0.9   | 9.80   | 74.59  | 7.61  | NS       | 0.8  |
| ENSG0000074416  | <b>MGLL</b>     | 21.04  | 21.20  | 1.01  | 1.00E-04 | 130.3 | 15.27  | 9.76   | 0.64  | 5.00E-04 | 64.8 |
| ENSG00000240972 | <b>MIF</b>      | 50.35  | 111.56 | 2.22  | 5.30E-03 | 0.5   | 78.77  | 130.61 | 1.66  | NS       | 0.6  |
| ENSG00000103150 | <b>MLYCD</b>    | 4.14   | 2.53   | 0.61  | 5.56E-06 | 0.9   | 4.71   | 2.87   | 0.61  | 0.00E+00 | 1.1  |
| ENSG00000104320 | <b>NBN</b>      | 5.20   | 21.89  | 4.21  | NS       | 0.8   | 4.29   | 23.35  | 5.45  | NS       | 0.8  |
| ENSG0000025770  | <b>NCAPH2</b>   | 10.02  | 59.88  | 5.97  | NS       | 1.3   | 12.09  | 73.68  | 6.09  | NS       | 1.4  |
| ENSG00000147383 | <b>NSDHL</b>    | 13.39  | 31.03  | 2.32  | 6.20E-03 | 0.6   | 24.15  | 43.09  | 1.78  | NS       | 0.8  |
| ENSG0000065057  | <b>NTHL1</b>    | 18.01  | 6.76   | 0.38  | 3.00E-04 | 0.2   | 25.09  | 9.33   | 0.37  | 5.00E-04 | 0.2  |
| ENSG00000115758 | <b>ODC1</b>     | 8.14   | 320.45 | 39.35 | 0.00E+00 | 2.5   | 7.10   | 328.92 | 46.34 | 1.00E-04 | 3.0  |
| ENSG00000198856 | <b>OSTC</b>     | 57.44  | 268.86 | 4.68  | NS       | 1.5   | 64.56  | 252.65 | 3.91  | NS       | 1.2  |
| ENSG00000166228 | <b>PCBD1</b>    | 157.37 | 48.31  | 0.31  | 3.61E-06 | 2.3   | 205.04 | 85.13  | 0.42  | 0.00E+00 | 2.7  |
| ENSG00000131828 | <b>PDHA1</b>    | 27.39  | 55.63  | 2.03  | 1.20E-03 | 0.9   | 27.95  | 66.24  | 2.37  | 5.10E-03 | 1.0  |
| ENSG00000168291 | <b>PDHB</b>     | 17.51  | 39.14  | 2.24  | 2.30E-03 | 0.4   | 22.22  | 53.05  | 2.39  | NS       | 0.5  |
| ENSG00000186951 | <b>PPARA</b>    | 19.13  | 8.93   | 0.47  | 0.00E+00 | 4.6   | 21.65  | 11.64  | 0.54  | 1.00E-04 | 6.5  |
| ENSG00000117592 | <b>PRDX6</b>    | 236.83 | 520.02 | 2.20  | 2.00E-03 | 0.9   | 272.43 | 667.41 | 2.45  | NS       | 1.2  |
| ENSG00000992010 | <b>PSME1</b>    | 83.56  | 117.90 | 1.41  | 1.00E-04 | 1.6   | 87.23  | 81.68  | 0.94  | 5.00E-04 | 0.8  |
| ENSG00000144724 | <b>PTPRG</b>    | 1.22   | 15.32  | 12.52 | NS       | 0.5   | 1.43   | 17.84  | 12.51 | NS       | 0.5  |
| ENSG00000150787 | <b>PTS</b>      | 13.44  | 46.23  | 3.44  | NS       | 4.2   | 8.06   | 49.80  | 6.18  | NS       | 4.8  |
| ENSG00000138698 | <b>RAP1GDS1</b> | 4.43   | 35.98  | 8.12  | NS       | 2.2   | 6.12   | 37.39  | 6.11  | NS       | 2.1  |
| ENSG0000072042  | <b>RDH11</b>    | 35.49  | 45.53  | 1.28  | 6.00E-04 | 0.6   | 31.24  | 73.63  | 2.36  | NS       | 0.7  |
| ENSG00000139547 | <b>RDH16</b>    | 160.54 | 0.70   | 0.00  | 1.39E-08 | 1.8   | 195.98 | 0.98   | 0.00  | 3.23E-08 | 1.9  |

|                 |          |        |        |       |          |         |        |        |       |          |      |
|-----------------|----------|--------|--------|-------|----------|---------|--------|--------|-------|----------|------|
| ENSG00000115255 | REEP6    | 151.23 | 3.54   | 0.02  | 6.89E-07 | 0.3     | 179.89 | 23.17  | 0.13  | 0.00E+00 | 1.8  |
| ENSG00000042445 | RETSAT   | 49.45  | 20.76  | 0.42  | 4.92E-06 | 1.8     | 55.79  | 39.89  | 0.71  | 1.00E-04 | 3.1  |
| ENSG00000197747 | S100A10  | 50.26  | 596.97 | 11.88 | 4.00E-03 | 5.0     | 23.66  | 651.20 | 27.53 | 4.30E-03 | 11.2 |
| ENSG00000073578 | SDHA     | 33.50  | 26.22  | 0.78  | 0.00E+00 | 0.9     | 35.16  | 30.57  | 0.87  | 0.00E+00 | 1.3  |
| ENSG00000143252 | SDHC     | 11.70  | 20.81  | 1.78  | 7.00E-04 | 1.1     | 11.65  | 22.88  | 1.96  | 1.30E-03 | 1.3  |
| ENSG00000204370 | SDHD     | 60.21  | 56.04  | 0.93  | 1.00E-04 | 0.8     | 61.49  | 62.95  | 1.02  | 1.00E-04 | 0.9  |
| ENSG00000111897 | SERINC1  | 78.83  | 297.69 | 3.78  | NS       | 4.9     | 65.47  | 391.24 | 5.98  | NS       | 5.8  |
| ENSG00000197375 | SLC22A5  | 2.41   | 17.69  | 7.35  | NS       | 11.5    | 2.58   | 10.94  | 4.24  | NS       | 7.4  |
| ENSG00000102172 | SMS      | 13.98  | 483.48 | 34.58 | 4.41E-06 | 1.4     | 13.01  | 238.15 | 18.31 | 1.90E-03 | 1.0  |
| ENSG00000136143 | SUCLA2   | 6.39   | 51.27  | 8.02  | NS       | 1.0     | 7.36   | 75.72  | 10.28 | NS       | 1.1  |
| ENSG00000163541 | SUCLG1   | 30.55  | 27.81  | 0.91  | 0.00E+00 | 1.4     | 25.33  | 39.15  | 1.55  | 3.00E-04 | 1.9  |
| ENSG00000172340 | SUCLG2   | 76.41  | 32.09  | 0.42  | 0.00E+00 | 0.7     | 74.04  | 49.31  | 0.67  | 1.00E-04 | 0.8  |
| ENSG00000151790 | TDO2     | 81.84  | 0.04   | 0.00  | 1.35E-06 | 3.4     | 56.20  | 1.23   | 0.02  | 5.33E-07 | 24.6 |
| ENSG00000078804 | TP53INP2 | 17.34  | 37.49  | 2.16  | 9.60E-03 | 6.7     | 15.35  | 63.01  | 4.10  | NS       | 11.8 |
| ENSG00000156587 | UBE2L6   | 33.52  | 50.17  | 1.50  | 1.10E-03 | 0.8     | 25.91  | 32.27  | 1.25  | 1.20E-03 | 0.5  |
| ENSG00000109814 | UGDH     | 15.02  | 58.13  | 3.87  | NS       | 1.0     | 19.49  | 53.10  | 2.72  | NS       | 0.9  |
| ENSG00000126088 | UROD     | 43.10  | 51.55  | 1.20  | 1.00E-03 | 0.9     | 50.86  | 66.83  | 1.31  | 3.30E-03 | 1.0  |
| ENSG00000188690 | UROS     | 6.50   | 11.67  | 1.79  | 1.60E-03 | 0.6     | 6.34   | 14.02  | 2.21  | 4.80E-03 | 0.8  |
| ENSG00000112299 | VNN1     | 77.81  | 0.04   | 0.00  | 2.59E-08 | #DIV/0! | 63.72  | 0.06   | 0.00  | 7.48E-08 | 2.7  |
| ENSG00000229807 | XIST     | 38.62  | 1.73   | 0.04  | NS       | 0.3     | 0.00   | 0.02   | 23.48 | NS       | 0.6  |
| ENSG00000128245 | YWHAH    | 12.22  | 226.42 | 18.52 | 1.00E-04 | 0.9     | 10.02  | 211.14 | 21.08 | 4.00E-04 | 0.8  |

## Hallmark Adipogenesis

|                 |         |        |        |       |          |      |        |        |       |          |      |
|-----------------|---------|--------|--------|-------|----------|------|--------|--------|-------|----------|------|
| ENSG00000165029 | ABCA1   | 16.96  | 15.04  | 0.89  | 1.60E-03 | 1.5  | 10.22  | 88.06  | 8.62  | NS       | 11.7 |
| ENSG00000197150 | ABCB8   | 4.71   | 13.12  | 2.78  | NS       | 2.2  | 4.41   | 13.72  | 3.11  | NS       | 2.2  |
| ENSG00000167315 | ACAA2   | 164.36 | 54.06  | 0.33  | 3.70E-06 | 0.8  | 209.38 | 71.71  | 0.34  | 9.71E-06 | 0.9  |
| ENSG00000115361 | ACADL   | 12.51  | 5.11   | 0.41  | 1.42E-06 | 27.9 | 11.90  | 12.63  | 1.06  | 9.00E-04 | 52.0 |
| ENSG00000117054 | ACADM   | 50.53  | 30.87  | 0.61  | 0.00E+00 | 0.8  | 51.62  | 43.00  | 0.83  | 1.00E-04 | 1.1  |
| ENSG00000122971 | ACADS   | 111.56 | 14.42  | 0.13  | 2.77E-07 | 2.7  | 119.35 | 11.09  | 0.09  | 7.99E-07 | 2.2  |
| ENSG00000131473 | ACLY    | 5.26   | 141.93 | 27.00 | 2.00E-04 | 0.4  | 6.08   | 197.91 | 32.57 | 1.00E-04 | 0.5  |
| ENSG00000100412 | ACO2    | 27.97  | 74.05  | 2.65  | 8.80E-03 | 1.2  | 22.70  | 108.94 | 4.80  | NS       | 1.6  |
| ENSG00000161533 | ACOX1   | 55.87  | 17.86  | 0.32  | 7.51E-07 | 1.9  | 57.78  | 23.32  | 0.40  | 2.60E-06 | 2.8  |
| ENSG00000174233 | ADCY6   | 8.74   | 35.74  | 4.09  | NS       | 3.3  | 11.83  | 37.41  | 3.16  | NS       | 3.0  |
| ENSG00000006831 | ADIPOR2 | 31.60  | 58.78  | 1.86  | 5.00E-04 | 1.7  | 39.29  | 57.87  | 1.47  | 5.00E-04 | 1.6  |

|                 |                |         |        |       |          |      |         |         |        |          |      |
|-----------------|----------------|---------|--------|-------|----------|------|---------|---------|--------|----------|------|
| ENSG00000160216 | <b>AGPAT3</b>  | 17.83   | 20.85  | 1.17  | 0.00E+00 | 4.7  | 18.84   | 31.16   | 1.65   | 9.00E-04 | 15.7 |
| ENSG00000156709 | <b>AIFM1</b>   | 40.28   | 36.11  | 0.90  | 0.00E+00 | 0.6  | 39.59   | 41.89   | 1.06   | 0.00E+00 | 0.7  |
| ENSG00000004455 | <b>AK2</b>     | 30.52   | 44.94  | 1.47  | 1.00E-04 | 1.0  | 35.58   | 48.69   | 1.37   | 5.00E-04 | 1.0  |
| ENSG00000111275 | <b>ALDH2</b>   | 1213.55 | 120.45 | 0.10  | 1.65E-07 | 2.0  | 1511.06 | 187.48  | 0.12   | 7.77E-07 | 3.2  |
| ENSG00000149925 | <b>ALDOA</b>   | 15.46   | 301.59 | 19.51 | 0.00E+00 | 1.0  | 12.04   | 262.38  | 21.80  | 2.00E-04 | 0.9  |
| ENSG00000154188 | <b>ANGPT1</b>  | 0.25    | 0.10   | 0.39  | 5.30E-03 | 0.1  | 0.06    | 1.52    | 23.56  | NS       | 2.0  |
| ENSG00000167772 | <b>ANGPTL4</b> | 9.42    | 83.96  | 8.91  | NS       | 72.2 | 18.56   | 31.54   | 1.70   | NS       | 21.5 |
| ENSG00000084234 | <b>APLP2</b>   | 83.20   | 359.75 | 4.32  | NS       | 1.8  | 78.12   | 914.32  | 11.70  | NS       | 4.1  |
| ENSG00000130203 | <b>APOE</b>    | 2589.24 | 449.37 | 0.17  | 0.00E+00 | 1.3  | 2690.60 | 1522.84 | 0.57   | 6.00E-04 | 4.1  |
| ENSG00000078061 | <b>ARAF</b>    | 34.82   | 44.94  | 1.29  | 5.00E-04 | 1.6  | 37.63   | 64.34   | 1.71   | 4.30E-03 | 2.4  |
| ENSG00000122644 | <b>ARL4A</b>   | 1.60    | 6.51   | 4.08  | NS       | 0.4  | 1.00    | 25.00   | 24.96  | 8.90E-03 | 1.4  |
| ENSG00000119787 | <b>ATL2</b>    | 13.37   | 41.50  | 3.10  | 7.90E-03 | 0.6  | 16.21   | 40.69   | 2.51   | 9.90E-03 | 0.8  |
| ENSG00000069849 | <b>ATP1B3</b>  | 2.05    | 122.61 | 59.80 | 1.00E-04 | 0.7  | 1.34    | 148.16  | 110.57 | 1.00E-04 | 0.8  |
| ENSG00000241837 | <b>ATP5O</b>   | 33.14   | 81.18  | 2.45  | 8.60E-03 | 0.7  | 39.23   | 121.68  | 3.10   | NS       | 0.9  |
| ENSG00000076108 | <b>BAZ2A</b>   | 8.35    | 64.58  | 7.73  | NS       | 1.3  | 11.50   | 72.89   | 6.34   | NS       | 1.3  |
| ENSG00000248098 | <b>BCKDHA</b>  | 28.86   | 24.95  | 0.86  | 0.00E+00 | 0.8  | 28.99   | 27.68   | 0.95   | 0.00E+00 | 0.9  |
| ENSG00000099968 | <b>BCL2L13</b> | 6.64    | 27.93  | 4.20  | NS       | 1.4  | 7.42    | 30.38   | 4.10   | NS       | 1.5  |
| ENSG00000113916 | <b>BCL6</b>    | 10.74   | 25.69  | 2.39  | NS       | 10.4 | 10.04   | 27.15   | 2.71   | NS       | 15.1 |
| ENSG00000125730 | <b>C3</b>      | 1773.54 | 14.49  | 0.01  | 1.54E-07 | 5.7  | 1456.62 | 7.61    | 0.01   | 0.00E+00 | 3.3  |
| ENSG00000121691 | <b>CAT</b>     | 341.00  | 10.86  | 0.03  | 1.54E-07 | 0.9  | 400.58  | 21.17   | 0.05   | 5.49E-07 | 1.5  |
| ENSG00000138764 | <b>CCNG2</b>   | 1.92    | 53.86  | 28.11 | 0.00E+00 | 12.0 | 1.29    | 26.95   | 20.92  | NS       | 4.6  |
| ENSG00000177697 | <b>CD151</b>   | 44.89   | 104.06 | 2.32  | NS       | 2.1  | 25.07   | 110.90  | 4.42   | NS       | 2.3  |
| ENSG00000241399 | <b>CD302</b>   | 73.86   | 1.52   | 0.02  | 2.46E-07 | 1.3  | 62.93   | 4.20    | 0.07   | 6.66E-07 | 3.9  |
| ENSG00000135218 | <b>CD36</b>    | 3.83    | 0.01   | 0.00  | 1.93E-06 | 0.0  | 4.19    | 0.11    | 0.03   | 0.00E+00 | 0.3  |
| ENSG00000123080 | <b>CDKN2C</b>  | 0.62    | 0.44   | 0.72  | 1.00E-04 | 8.7  | 1.14    | 0.68    | 0.60   | 2.00E-04 | 11.4 |
| ENSG00000250479 | <b>CHCHD10</b> | 42.30   | 3.53   | 0.08  | 1.47E-06 | 0.2  | 73.23   | 21.18   | 0.29   | 3.00E-04 | 1.0  |
| ENSG00000213341 | <b>CHUK</b>    | 2.97    | 18.85  | 6.35  | NS       | 1.3  | 2.90    | 23.11   | 7.96   | NS       | 1.6  |
| ENSG00000164237 | <b>CMBL</b>    | 113.11  | 17.00  | 0.15  | 2.82E-06 | 0.9  | 157.50  | 54.45   | 0.35   | 2.00E-04 | 2.8  |
| ENSG00000162368 | <b>CMPK1</b>   | 60.26   | 97.13  | 1.61  | 2.00E-04 | 2.7  | 63.67   | 108.52  | 1.70   | 5.00E-04 | 2.8  |
| ENSG00000204291 | <b>COL15A1</b> | 0.25    | 1.91   | 7.64  | NS       | 9.9  | 0.08    | 2.45    | 28.94  | NS       | 8.9  |
| ENSG00000187498 | <b>COL4A1</b>  | 2.57    | 84.32  | 32.81 | NS       | 1.6  | 1.24    | 601.28  | 483.68 | 1.20E-03 | 10.7 |
| ENSG00000132423 | <b>COQ3</b>    | 8.91    | 5.89   | 0.66  | 0.00E+00 | 0.2  | 8.83    | 10.75   | 1.22   | 5.00E-04 | 0.4  |
| ENSG00000110871 | <b>COQ5</b>    | 19.73   | 47.88  | 2.43  | 3.20E-03 | 1.7  | 21.09   | 53.97   | 2.56   | 9.10E-03 | 1.6  |

|                 |                |        |        |       |          |     |        |        |       |          |         |
|-----------------|----------------|--------|--------|-------|----------|-----|--------|--------|-------|----------|---------|
| ENSG0000088682  | <b>COQ9</b>    | 17.34  | 14.19  | 0.82  | 0.00E+00 | 0.9 | 17.82  | 18.98  | 1.07  | 1.00E-04 | 1.3     |
| ENSG00000111775 | <b>COX6A1</b>  | 133.21 | 163.36 | 1.23  | 8.00E-04 | 0.9 | 128.27 | 245.19 | 1.91  | 8.50E-03 | 1.4     |
| ENSG00000131174 | <b>COX7B</b>   | 34.01  | 31.18  | 0.92  | 1.00E-04 | 0.5 | 38.36  | 39.93  | 1.04  | 4.00E-04 | 0.7     |
| ENSG00000176340 | <b>COX8A</b>   | 233.95 | 388.62 | 1.66  | 5.80E-03 | 0.7 | 243.47 | 523.06 | 2.15  | NS       | 0.9     |
| ENSG00000157184 | <b>CPT2</b>    | 39.48  | 19.74  | 0.50  | 6.90E-06 | 0.6 | 31.01  | 20.91  | 0.67  | 0.00E+00 | 0.7     |
| ENSG00000095321 | <b>CRAT</b>    | 66.79  | 17.71  | 0.27  | 1.34E-06 | 1.9 | 76.38  | 17.51  | 0.23  | 2.34E-06 | 1.8     |
| ENSG00000062485 | <b>CS</b>      | 19.58  | 97.81  | 5.00  | NS       | 1.0 | 15.24  | 98.93  | 6.49  | NS       | 1.0     |
| ENSG00000179091 | <b>CYC1</b>    | 45.67  | 81.05  | 1.77  | 3.00E-04 | 0.6 | 56.58  | 115.77 | 2.05  | 3.40E-03 | 0.8     |
| ENSG00000137992 | <b>DBT</b>     | 5.94   | 10.10  | 1.70  | 4.20E-03 | 1.1 | 6.06   | 11.55  | 1.91  | 5.70E-03 | 1.1     |
| ENSG00000099977 | <b>DDT</b>     | 98.30  | 17.01  | 0.17  | 4.12E-06 | 0.7 | 135.98 | 28.72  | 0.21  | 0.00E+00 | 1.2     |
| ENSG00000104325 | <b>DECRI</b>   | 110.40 | 12.49  | 0.11  | 2.25E-07 | 0.6 | 82.53  | 14.53  | 0.18  | 6.47E-07 | 0.8     |
| ENSG00000185000 | <b>DGAT1</b>   | 27.63  | 11.02  | 0.40  | 0.00E+00 | 1.0 | 30.40  | 21.06  | 0.69  | 4.00E-04 | 1.9     |
| ENSG00000172893 | <b>DHCR7</b>   | 54.07  | 9.52   | 0.18  | 0.00E+00 | 0.1 | 57.04  | 35.68  | 0.63  | 1.10E-03 | 0.4     |
| ENSG00000100612 | <b>DHRS7</b>   | 21.15  | 39.71  | 1.88  | 1.00E-03 | 2.9 | 20.77  | 57.34  | 2.76  | 8.50E-03 | 2.7     |
| ENSG00000109016 | <b>DHRS7B</b>  | 3.35   | 9.60   | 2.86  | NS       | 2.1 | 3.11   | 12.61  | 4.06  | NS       | 2.5     |
| ENSG00000150768 | <b>DLAT</b>    | 5.35   | 38.66  | 7.22  | NS       | 0.6 | 3.44   | 58.86  | 17.13 | NS       | 0.9     |
| ENSG00000091140 | <b>DLD</b>     | 18.16  | 68.13  | 3.75  | NS       | 1.3 | 18.15  | 69.14  | 3.81  | NS       | 1.2     |
| ENSG00000128590 | <b>DNAJB9</b>  | 18.34  | 71.72  | 3.91  | NS       | 4.9 | 32.82  | 62.78  | 1.91  | NS       | 3.6     |
| ENSG00000120675 | <b>DNAJC15</b> | 6.62   | 25.50  | 3.85  | NS       | 3.0 | 7.13   | 50.48  | 7.08  | NS       | 5.6     |
| ENSG00000156171 | <b>DRAM2</b>   | 10.45  | 68.64  | 6.57  | NS       | 3.3 | 13.05  | 72.15  | 5.53  | NS       | 3.3     |
| ENSG00000104823 | <b>ECH1</b>    | 172.35 | 52.06  | 0.30  | 4.18E-06 | 0.7 | 215.23 | 70.43  | 0.33  | 0.00E+00 | 0.8     |
| ENSG00000127884 | <b>ECHS1</b>   | 768.10 | 128.10 | 0.17  | 1.59E-06 | 0.8 | 763.36 | 172.03 | 0.23  | 5.05E-06 | 1.0     |
| ENSG00000115459 | <b>ELMOD3</b>  | 5.46   | 8.02   | 1.47  | 8.10E-03 | 2.9 | 5.51   | 9.40   | 1.71  | NS       | 3.5     |
| ENSG00000170522 | <b>ELOVL6</b>  | 12.45  | 29.92  | 2.40  | 6.70E-03 | 0.5 | 19.83  | 23.14  | 1.17  | 4.70E-03 | 0.3     |
| ENSG00000136960 | <b>ENPP2</b>   | 6.48   | 1.43   | 0.22  | NS       | 1.3 | 0.61   | 16.02  | 26.11 | NS       | 6.3     |
| ENSG00000120915 | <b>EPHX2</b>   | 89.31  | 1.23   | 0.01  | 1.37E-07 | 0.3 | 100.87 | 4.30   | 0.04  | 8.65E-08 | 0.8     |
| ENSG00000173153 | <b>ESRRA</b>   | 25.00  | 29.32  | 1.17  | 2.00E-04 | 1.3 | 26.17  | 29.48  | 1.13  | 3.00E-04 | 1.2     |
| ENSG00000139641 | <b>ESYT1</b>   | 22.20  | 132.87 | 5.98  | NS       | 1.5 | 19.76  | 126.47 | 6.40  | NS       | 1.5     |
| ENSG00000105379 | <b>ETFB</b>    | 59.67  | 6.80   | 0.11  | 5.10E-06 | 0.9 | 67.99  | 17.95  | 0.26  | 0.00E+00 | 1.7     |
| ENSG00000170323 | <b>FABP4</b>   | 1.29   | 0.00   | 0.00  | 1.00E-04 | 0.0 | 0.24   | 0.00   | 0.00  | 1.00E-04 | #DIV/0! |
| ENSG00000103876 | <b>FAH</b>     | 41.82  | 12.60  | 0.30  | 1.83E-06 | 2.3 | 53.48  | 9.19   | 0.17  | 0.00E+00 | 1.5     |
| ENSG00000174804 | <b>FZD4</b>    | 13.82  | 5.78   | 0.42  | 0.00E+00 | 0.7 | 12.39  | 51.91  | 4.19  | NS       | 7.9     |
| ENSG00000138757 | <b>G3BP2</b>   | 9.25   | 96.73  | 10.45 | NS       | 0.5 | 8.58   | 122.57 | 14.29 | NS       | 0.7     |



|                 |                |        |        |        |          |       |        |        |         |          |      |
|-----------------|----------------|--------|--------|--------|----------|-------|--------|--------|---------|----------|------|
| ENSG00000116717 | <b>GADD45A</b> | 42.67  | 188.41 | 4.42   | NS       | 23.6  | 45.42  | 189.69 | 4.18    | NS       | 21.9 |
| ENSG00000114480 | <b>GBE1</b>    | 21.86  | 30.94  | 1.42   | 8.00E-04 | 4.4   | 17.66  | 36.42  | 2.06    | 1.50E-03 | 4.3  |
| ENSG00000165678 | <b>GHITM</b>   | 115.60 | 380.54 | 3.29   | NS       | 2.3   | 112.97 | 429.12 | 3.80    | NS       | 2.7  |
| ENSG00000119927 | <b>GPAM</b>    | 54.08  | 13.38  | 0.25   | 0.00E+00 | 0.9   | 68.46  | 13.78  | 0.20    | 0.00E+00 | 1.0  |
| ENSG00000115159 | <b>GPD2</b>    | 1.07   | 38.54  | 36.08  | 2.00E-04 | 1.2   | 0.70   | 46.91  | 66.77   | 2.00E-04 | 1.4  |
| ENSG00000171723 | <b>GPHN</b>    | 6.45   | 7.76   | 1.20   | 2.00E-04 | 0.9   | 9.49   | 11.09  | 1.17    | 6.00E-04 | 0.9  |
| ENSG00000211445 | <b>GPX3</b>    | 108.25 | 4.71   | 0.04   | 1.80E-07 | 0.2   | 70.65  | 67.16  | 0.95    | 2.00E-03 | 1.7  |
| ENSG00000167468 | <b>GPX4</b>    | 197.85 | 209.81 | 1.06   | 1.60E-03 | 1.2   | 286.71 | 358.68 | 1.25    | NS       | 1.9  |
| ENSG00000109519 | <b>GRPEL1</b>  | 12.54  | 30.35  | 2.42   | 1.90E-03 | 1.2   | 15.06  | 23.99  | 1.59    | 6.00E-04 | 0.9  |
| ENSG00000138796 | <b>HADH</b>    | 61.90  | 34.63  | 0.56   | 7.92E-06 | 0.7   | 74.19  | 28.42  | 0.38    | 0.00E+00 | 0.6  |
| ENSG00000198130 | <b>HIBCH</b>   | 20.91  | 5.32   | 0.25   | 1.99E-06 | 0.5   | 17.45  | 7.74   | 0.44    | 7.67E-06 | 0.7  |
| ENSG00000152137 | <b>HSPB8</b>   | 0.48   | 184.76 | 386.48 | 1.00E-04 | 7.7   | 0.25   | 248.70 | 1002.98 | 1.00E-04 | 16.2 |
| ENSG00000138413 | <b>IDH1</b>    | 130.12 | 76.64  | 0.59   | 8.11E-06 | 0.3   | 125.10 | 176.61 | 1.41    | 1.20E-03 | 0.5  |
| ENSG00000166411 | <b>IDH3A</b>   | 3.98   | 15.02  | 3.77   | NS       | 1.1   | 4.31   | 15.70  | 3.64    | NS       | 1.3  |
| ENSG00000067829 | <b>IDH3G</b>   | 14.49  | 21.50  | 1.48   | 7.60E-03 | 0.8   | 14.65  | 29.45  | 2.01    | NS       | 1.0  |
| ENSG00000027697 | <b>IFNGR1</b>  | 22.46  | 116.91 | 5.21   | NS       | 3.6   | 15.81  | 156.62 | 9.91    | NS       | 4.1  |
| ENSG00000132305 | <b>IMMT</b>    | 18.44  | 101.58 | 5.51   | NS       | 1.1   | 17.81  | 110.07 | 6.18    | NS       | 1.0  |
| ENSG00000135424 | <b>ITGA7</b>   | 1.95   | 2.66   | 1.36   | 2.90E-03 | 0.1   | 1.51   | 9.25   | 6.14    | NS       | 0.3  |
| ENSG00000123243 | <b>ITIH5</b>   | 0.44   | 0.80   | 1.81   | NS       | 0.5   | 0.16   | 3.68   | 22.82   | NS       | 2.4  |
| ENSG00000205726 | <b>ITSN1</b>   | 3.35   | 15.73  | 4.69   | NS       | 0.8   | 3.24   | 19.10  | 5.89    | NS       | 1.0  |
| ENSG00000171135 | <b>JAGN1</b>   | 30.35  | 52.00  | 1.71   | 3.00E-03 | 1.2   | 30.99  | 54.69  | 1.76    | 4.00E-03 | 1.3  |
| ENSG00000112769 | <b>LAMA4</b>   | 1.17   | 0.04   | 0.03   | 6.70E-06 | 0.1   | 0.49   | 0.41   | 0.84    | 6.00E-04 | 0.8  |
| ENSG00000113594 | <b>LIFR</b>    | 7.24   | 32.21  | 4.45   | NS       | 4.1   | 3.72   | 124.40 | 33.42   | NS       | 14.6 |
| ENSG00000079435 | <b>LIPE</b>    | 0.21   | 1.41   | 6.68   | NS       | 0.4   | 0.09   | 1.44   | 16.32   | NS       | 0.5  |
| ENSG00000111684 | <b>LPCAT3</b>  | 23.02  | 34.58  | 1.50   | 2.00E-04 | 0.9   | 23.42  | 41.17  | 1.76    | 7.00E-04 | 1.0  |
| ENSG00000175445 | <b>LPL</b>     | 0.08   | 44.52  | 532.69 | 7.00E-04 | 6.4   | 0.00   | 24.00  | 5041.67 | 3.30E-03 | 2.3  |
| ENSG00000213316 | <b>LTC4S</b>   | 1.52   | 0.98   | 0.64   | 2.10E-03 | 1.9   | 1.63   | 0.61   | 0.38    | 6.00E-04 | 1.4  |
| ENSG00000011566 | <b>MAP4K3</b>  | 4.43   | 68.01  | 15.36  | 5.40E-03 | 1.3   | 3.96   | 42.82  | 10.80   | NS       | 0.9  |
| ENSG00000078070 | <b>MCCC1</b>   | 21.70  | 15.40  | 0.71   | 0.00E+00 | 0.8   | 17.80  | 20.12  | 1.13    | 1.00E-04 | 1.2  |
| ENSG00000146701 | <b>MDH2</b>    | 50.71  | 106.63 | 2.10   | 7.00E-04 | 0.7   | 49.98  | 122.38 | 2.45    | 2.80E-03 | 0.8  |
| ENSG00000065833 | <b>ME1</b>     | 3.30   | 38.69  | 11.72  | 2.50E-03 | 5.0   | 2.47   | 78.78  | 31.91   | 3.00E-04 | 10.6 |
| ENSG00000074416 | <b>MGLL</b>    | 21.04  | 21.20  | 1.01   | 1.00E-04 | 130.3 | 15.27  | 9.76   | 0.64    | 5.00E-04 | 64.8 |
| ENSG00000143198 | <b>MGST3</b>   | 7.32   | 29.56  | 4.04   | NS       | 2.8   | 9.02   | 25.79  | 2.86    | NS       | 1.9  |

|                 |                 |         |        |       |          |       |         |        |       |          |       |
|-----------------|-----------------|---------|--------|-------|----------|-------|---------|--------|-------|----------|-------|
| ENSG00000137547 | <b>MRPL15</b>   | 28.47   | 166.99 | 5.86  | NS       | 1.1   | 28.23   | 146.95 | 5.21  | NS       | 0.9   |
| ENSG00000109919 | <b>MTCH2</b>    | 73.38   | 92.51  | 1.26  | 1.00E-04 | 1.0   | 81.91   | 120.31 | 1.47  | 5.00E-04 | 1.4   |
| ENSG00000065534 | <b>MYLK</b>     | 6.76    | 39.77  | 5.88  | NS       | 9.7   | 5.71    | 11.75  | 2.06  | NS       | 2.4   |
| ENSG00000128609 | <b>NDUFA5</b>   | 8.10    | 14.84  | 1.83  | 1.00E-03 | 0.8   | 7.30    | 16.99  | 2.33  | 3.00E-03 | 0.9   |
| ENSG00000004779 | <b>NDUFAB1</b>  | 42.03   | 72.13  | 1.72  | 2.80E-03 | 0.6   | 55.73   | 92.43  | 1.66  | NS       | 0.9   |
| ENSG00000099795 | <b>NDUFB7</b>   | 171.09  | 200.80 | 1.17  | 3.20E-03 | 1.0   | 226.45  | 235.57 | 1.04  | 5.50E-03 | 1.2   |
| ENSG00000213619 | <b>NDUFS3</b>   | 21.86   | 41.48  | 1.90  | 9.40E-03 | 0.8   | 27.19   | 48.09  | 1.77  | NS       | 0.9   |
| ENSG00000197885 | <b>NKIRAS1</b>  | 3.77    | 7.68   | 2.04  | 6.00E-04 | 1.9   | 4.90    | 9.82   | 2.00  | 3.50E-03 | 2.0   |
| ENSG00000136448 | <b>NMT1</b>     | 19.97   | 78.89  | 3.95  | NS       | 1.1   | 20.90   | 95.20  | 4.55  | NS       | 1.2   |
| ENSG00000229314 | <b>ORM1</b>     | 9562.54 | 0.18   | 0.00  | 6.16E-10 | 0.5   | 5834.23 | 2.41   | 0.00  | 1.25E-08 | 1.4   |
| ENSG00000150593 | <b>PDCD4</b>    | 15.03   | 54.95  | 3.65  | NS       | 4.7   | 12.85   | 43.46  | 3.38  | NS       | 4.0   |
| ENSG00000133027 | <b>PEMT</b>     | 64.28   | 19.85  | 0.31  | 1.14E-06 | 0.6   | 76.71   | 19.92  | 0.26  | 1.94E-06 | 0.6   |
| ENSG00000142655 | <b>PEX14</b>    | 13.22   | 27.16  | 2.05  | NS       | 1.6   | 14.49   | 34.96  | 2.41  | NS       | 2.1   |
| ENSG00000170525 | <b>PFKFB3</b>   | 11.53   | 49.90  | 4.33  | NS       | 2.4   | 1.62    | 49.73  | 30.60 | NS       | 2.3   |
| ENSG00000141959 | <b>PFKL</b>     | 21.56   | 68.92  | 3.20  | NS       | 2.3   | 22.41   | 62.65  | 2.80  | NS       | 1.9   |
| ENSG00000079739 | <b>PGM1</b>     | 90.55   | 47.35  | 0.52  | 6.54E-06 | 0.9   | 104.33  | 59.08  | 0.57  | 0.00E+00 | 1.7   |
| ENSG00000019144 | <b>PHLDB1</b>   | 0.78    | 8.65   | 11.12 | 1.80E-03 | 1.1   | 0.50    | 10.83  | 21.47 | 2.30E-03 | 1.0   |
| ENSG00000107537 | <b>PHYH</b>     | 202.87  | 25.58  | 0.13  | 9.82E-07 | 2.0   | 216.53  | 28.19  | 0.13  | 2.26E-06 | 2.1   |
| ENSG00000198355 | <b>PIM3</b>     | 17.46   | 51.38  | 2.94  | NS       | 1.9   | 20.67   | 49.04  | 2.37  | NS       | 3.1   |
| ENSG00000147872 | <b>PLIN2</b>    | 59.84   | 213.27 | 3.56  | NS       | 12.0  | 50.42   | 139.53 | 2.77  | NS       | 6.5   |
| ENSG00000127948 | <b>POR</b>      | 54.92   | 44.06  | 0.80  | 0.00E+00 | 1.2   | 60.24   | 41.83  | 0.69  | 0.00E+00 | 1.1   |
| ENSG00000132170 | <b>PPARG</b>    | 2.43    | 15.37  | 6.34  | NS       | 117.0 | 2.97    | 10.43  | 3.51  | NS       | 107.0 |
| ENSG00000138032 | <b>PPM1B</b>    | 8.70    | 38.39  | 4.41  | NS       | 0.4   | 7.09    | 35.00  | 4.94  | NS       | 0.5   |
| ENSG00000158615 | <b>PPP1R15B</b> | 9.63    | 109.04 | 11.32 | NS       | 2.5   | 11.14   | 96.27  | 8.64  | NS       | 2.2   |
| ENSG00000162976 | <b>PQLC3</b>    | 7.77    | 27.14  | 3.49  | NS       | 1.7   | 4.49    | 18.11  | 4.03  | NS       | 1.4   |
| ENSG00000165672 | <b>PRDX3</b>    | 94.31   | 133.25 | 1.41  | 4.00E-04 | 0.7   | 99.03   | 194.23 | 1.96  | 2.20E-03 | 0.9   |
| ENSG00000138073 | <b>PREB</b>     | 18.31   | 68.69  | 3.75  | NS       | 1.1   | 29.00   | 48.99  | 1.69  | NS       | 1.1   |
| ENSG00000132300 | <b>PTCD3</b>    | 8.35    | 23.10  | 2.76  | 3.30E-03 | 0.5   | 9.63    | 30.69  | 3.19  | NS       | 0.7   |
| ENSG00000050628 | <b>PTGER3</b>   | 0.04    | 0.12   | 3.27  | NS       | 0.3   | 0.02    | 0.30   | 15.63 | NS       | 1.1   |
| ENSG00000177469 | <b>PTRF</b>     | 9.59    | 229.79 | 23.97 | 5.00E-04 | 5.0   | 4.03    | 94.28  | 23.38 | NS       | 2.7   |
| ENSG00000151552 | <b>QDPR</b>     | 69.50   | 34.80  | 0.50  | 6.55E-06 | 2.1   | 70.61   | 39.33  | 0.56  | 0.00E+00 | 2.0   |
| ENSG00000109113 | <b>RAB34</b>    | 1.67    | 92.76  | 55.40 | 9.00E-06 | 0.7   | 0.88    | 84.34  | 96.03 | 0.00E+00 | 0.8   |
| ENSG00000129625 | <b>REEP5</b>    | 41.53   | 112.57 | 2.71  | 4.40E-03 | 2.3   | 39.75   | 89.98  | 2.26  | 1.40E-03 | 1.9   |

|                 |          |        |        |        |          |      |        |        |        |          |      |
|-----------------|----------|--------|--------|--------|----------|------|--------|--------|--------|----------|------|
| ENSG00000115255 | REEP6    | 151.23 | 3.54   | 0.02   | 6.89E-07 | 0.3  | 179.89 | 23.17  | 0.13   | 0.00E+00 | 1.8  |
| ENSG00000042445 | RETSAT   | 49.45  | 20.76  | 0.42   | 4.92E-06 | 1.8  | 55.79  | 39.89  | 0.71   | 1.00E-04 | 3.1  |
| ENSG00000101782 | RIOK3    | 19.84  | 111.08 | 5.60   | NS       | 8.0  | 18.32  | 94.95  | 5.18   | NS       | 6.7  |
| ENSG00000123091 | RNF11    | 18.93  | 84.41  | 4.46   | NS       | 1.7  | 18.99  | 128.74 | 6.78   | NS       | 2.2  |
| ENSG00000124782 | RREB1    | 5.42   | 17.97  | 3.32   | NS       | 3.2  | 5.57   | 16.69  | 3.00   | NS       | 2.4  |
| ENSG00000133318 | RTN3     | 19.01  | 84.75  | 4.46   | NS       | 0.7  | 18.37  | 114.46 | 6.23   | NS       | 1.0  |
| ENSG00000100347 | SAMM50   | 6.40   | 24.56  | 3.84   | NS       | 0.8  | 7.21   | 29.57  | 4.10   | NS       | 0.9  |
| ENSG00000073060 | SCARB1   | 50.16  | 1.62   | 0.03   | 4.87E-08 | 0.1  | 53.88  | 23.34  | 0.43   | 7.00E-04 | 1.1  |
| ENSG00000116171 | SCP2     | 129.48 | 21.53  | 0.17   | 1.41E-06 | 1.7  | 122.10 | 26.00  | 0.21   | 2.51E-06 | 2.1  |
| ENSG00000117118 | SDHB     | 65.44  | 42.91  | 0.66   | 5.48E-06 | 0.8  | 69.59  | 60.35  | 0.87   | 1.00E-04 | 1.1  |
| ENSG00000143252 | SDHC     | 11.70  | 20.81  | 1.78   | 7.00E-04 | 1.1  | 11.65  | 22.88  | 1.96   | 1.30E-03 | 1.3  |
| ENSG00000168497 | SDPR     | 5.23   | 0.15   | 0.03   | 1.00E-04 | 3.6  | 1.80   | 0.91   | 0.51   | 1.20E-03 | 21.9 |
| ENSG00000173638 | SLC19A1  | 2.55   | 3.43   | 1.34   | 4.30E-03 | 0.3  | 3.79   | 5.01   | 1.32   | NS       | 0.5  |
| ENSG00000105281 | SLC1A5   | 1.37   | 640.33 | 467.30 | 4.81E-06 | 3.2  | 1.02   | 449.17 | 440.21 | 0.00E+00 | 1.8  |
| ENSG00000100075 | SLC25A1  | 76.35  | 69.39  | 0.91   | 1.00E-04 | 0.6  | 108.64 | 145.24 | 1.34   | 3.70E-03 | 1.1  |
| ENSG00000183048 | SLC25A10 | 61.47  | 7.87   | 0.13   | 3.27E-06 | 0.3  | 81.60  | 14.07  | 0.17   | 0.00E+00 | 0.6  |
| ENSG00000130304 | SLC27A1  | 3.63   | 6.05   | 1.66   | NS       | 2.5  | 2.86   | 3.44   | 1.20   | 3.60E-03 | 1.1  |
| ENSG00000138074 | SLC5A6   | 9.08   | 200.55 | 22.09  | 3.00E-04 | 1.7  | 13.61  | 93.77  | 6.89   | NS       | 1.1  |
| ENSG00000173267 | SNCG     | 1.25   | 2.94   | 2.35   | NS       | 0.5  | 0.79   | 2.56   | 3.26   | NS       | 0.3  |
| ENSG00000142168 | SOD1     | 416.76 | 112.95 | 0.27   | 4.32E-06 | 0.8  | 569.21 | 148.84 | 0.26   | 9.53E-06 | 0.9  |
| ENSG00000095637 | SORBS1   | 9.77   | 0.62   | 0.06   | 8.91E-08 | 0.0  | 10.03  | 4.84   | 0.48   | 2.00E-04 | 0.3  |
| ENSG00000152583 | SPARCL1  | 6.31   | 0.35   | 0.06   | 0.00E+00 | 0.2  | 2.74   | 3.22   | 1.18   | 6.30E-03 | 2.1  |
| ENSG00000137767 | SQRDL    | 20.72  | 7.73   | 0.37   | 3.70E-06 | 31.0 | 20.78  | 5.78   | 0.28   | 1.00E-04 | 39.0 |
| ENSG00000123096 | SSPN     | 0.36   | 2.62   | 7.31   | NS       | 3.9  | 0.16   | 1.08   | 6.64   | NS       | 1.7  |
| ENSG00000126561 | STAT5A   | 3.52   | 6.41   | 1.82   | 6.00E-04 | 1.3  | 2.87   | 3.64   | 1.27   | 1.00E-03 | 1.0  |
| ENSG00000148175 | STOM     | 132.96 | 119.84 | 0.90   | 4.00E-04 | 3.0  | 77.20  | 136.79 | 1.77   | 6.00E-04 | 4.6  |
| ENSG00000163541 | SUCLG1   | 30.55  | 27.81  | 0.91   | 0.00E+00 | 1.4  | 25.33  | 39.15  | 1.55   | 3.00E-04 | 1.9  |
| ENSG00000196502 | SULT1A1  | 31.27  | 1.17   | 0.04   | 3.53E-07 | 1.2  | 27.11  | 2.78   | 0.10   | 4.83E-06 | 1.5  |
| ENSG00000177156 | TALDO1   | 39.47  | 145.33 | 3.68   | NS       | 0.8  | 42.14  | 178.58 | 4.24   | NS       | 1.1  |
| ENSG00000136560 | TANK     | 7.04   | 21.26  | 3.02   | NS       | 2.9  | 6.52   | 20.58  | 3.15   | NS       | 2.6  |
| ENSG00000163931 | TKT      | 7.33   | 221.55 | 30.22  | 8.42E-06 | 0.9  | 8.19   | 206.24 | 25.17  | 1.00E-04 | 0.7  |
| ENSG00000141232 | TOB1     | 39.19  | 45.55  | 1.16   | 1.00E-04 | 2.2  | 45.59  | 52.14  | 1.14   | 1.00E-04 | 2.3  |
| ENSG00000128311 | TST      | 207.39 | 23.39  | 0.11   | 7.67E-07 | 1.1  | 255.45 | 25.04  | 0.10   | 1.64E-06 | 1.2  |

|                 |        |        |         |       |          |     |        |         |       |          |     |
|-----------------|--------|--------|---------|-------|----------|-----|--------|---------|-------|----------|-----|
| ENSG00000150991 | UBC    | 226.49 | 1280.90 | 5.66  | NS       | 2.4 | 251.97 | 1330.75 | 5.28  | NS       | 2.4 |
| ENSG00000135018 | UBQLN1 | 11.52  | 87.70   | 7.61  | NS       | 1.2 | 13.05  | 90.82   | 6.96  | NS       | 1.2 |
| ENSG00000130717 | UCK1   | 16.36  | 39.05   | 2.39  | 2.00E-03 | 1.0 | 19.24  | 45.88   | 2.39  | 5.40E-03 | 1.2 |
| ENSG00000175567 | UCP2   | 4.74   | 4.24    | 0.90  | NS       | 0.2 | 1.28   | 17.62   | 13.74 | NS       | 0.4 |
| ENSG00000184076 | UQCR10 | 73.22  | 109.81  | 1.50  | 7.00E-04 | 0.8 | 84.69  | 171.41  | 2.02  | 8.80E-03 | 1.1 |
| ENSG00000127540 | UQCR11 | 52.54  | 48.40   | 0.92  | 7.00E-04 | 0.7 | 60.85  | 75.45   | 1.24  | 4.90E-03 | 1.1 |
| ENSG00000010256 | UQCRC1 | 73.65  | 157.49  | 2.14  | 2.50E-03 | 1.0 | 85.49  | 138.73  | 1.62  | 1.50E-03 | 0.9 |
| ENSG00000164405 | UQCRQ  | 150.51 | 46.07   | 0.31  | 1.00E-04 | 0.6 | 149.63 | 75.66   | 0.51  | 3.00E-04 | 1.0 |
| ENSG00000173511 | VEGFB  | 15.79  | 57.19   | 3.62  | NS       | 2.0 | 15.36  | 78.50   | 5.11  | NS       | 3.1 |
| ENSG00000170027 | YWHAG  | 19.25  | 269.63  | 14.01 | 5.60E-03 | 0.8 | 22.10  | 290.78  | 13.16 | 8.10E-03 | 0.9 |

### Hallmark Cholesterol Homeostasis

|                 |         |         |         |        |          |         |         |         |        |          |         |
|-----------------|---------|---------|---------|--------|----------|---------|---------|---------|--------|----------|---------|
| ENSG00000107331 | ABCA2   | 10.88   | 1.14    | 0.10   | 3.72E-07 | 0.2     | 9.70    | 5.46    | 0.56   | 3.00E-04 | 0.9     |
| ENSG00000120437 | ACAT2   | 28.37   | 24.15   | 0.85   | 3.00E-04 | 0.2     | 50.99   | 45.02   | 0.88   | 5.40E-03 | 0.3     |
| ENSG00000131069 | ACSS2   | 43.22   | 18.11   | 0.42   | 1.00E-04 | 1.3     | 61.85   | 18.34   | 0.30   | 1.00E-04 | 0.9     |
| ENSG00000184009 | ACTG1   | 218.07  | 4348.52 | 19.94  | 1.00E-04 | 2.0     | 212.39  | 3291.27 | 15.50  | 9.00E-04 | 1.4     |
| ENSG00000198099 | ADH4    | 1838.30 | 0.06    | 0.00   | 7.80E-08 | 0.5     | 2589.75 | 0.45    | 0.00   | 2.47E-09 | 1.0     |
| ENSG00000170017 | ALCAM   | 14.36   | 16.39   | 1.14   | 1.00E-04 | 0.5     | 12.93   | 67.72   | 5.24   | NS       | 2.9     |
| ENSG00000109107 | ALDOC   | 47.39   | 3.17    | 0.07   | 8.69E-06 | 0.1     | 33.94   | 5.58    | 0.16   | 0.00E+00 | 0.1     |
| ENSG00000163297 | ANTXR2  | 4.91    | 35.30   | 7.19   | NS       | 11.0    | 4.41    | 14.97   | 3.39   | NS       | 6.1     |
| ENSG00000104537 | ANXA13  | 9.08    | 0.00    | 0.00   | 2.00E-04 | #DIV/0! | 3.50    | 0.01    | 0.00   | 3.00E-04 | #DIV/0! |
| ENSG00000164111 | ANXA5   | 25.16   | 769.00  | 30.57  | 1.00E-04 | 3.2     | 13.22   | 614.27  | 46.46  | 3.00E-04 | 2.9     |
| ENSG00000162772 | ATF3    | 0.90    | 145.28  | 161.34 | 4.28E-06 | 14.4    | 1.06    | 146.83  | 138.73 | 6.21E-06 | 16.5    |
| ENSG00000169136 | ATF5    | 462.12  | 54.49   | 0.12   | 3.47E-06 | 3.5     | 435.87  | 78.94   | 0.18   | 8.16E-06 | 3.2     |
| ENSG00000204842 | ATXN2   | 3.50    | 17.56   | 5.02   | NS       | 2.1     | 3.52    | 18.28   | 5.19   | NS       | 2.1     |
| ENSG00000166148 | AVPR1A  | 3.64    | 0.14    | 0.04   | 0.00E+00 | 0.7     | 2.23    | 4.89    | 2.19   | NS       | 22.5    |
| ENSG00000160200 | CBS     | 36.94   | 46.42   | 1.26   | 6.00E-04 | 0.4     | 79.97   | 72.93   | 0.91   | 3.10E-03 | 0.7     |
| ENSG00000010278 | CD9     | 6.62    | 228.24  | 34.50  | 1.00E-04 | 2.3     | 5.29    | 97.34   | 18.39  | NS       | 0.9     |
| ENSG00000110721 | CHKA    | 27.97   | 72.99   | 2.61   | NS       | 1.4     | 27.72   | 74.21   | 2.68   | NS       | 1.3     |
| ENSG00000120885 | CLU     | 859.16  | 23.62   | 0.03   | 1.77E-08 | 0.2     | 749.50  | 52.36   | 0.07   | 2.38E-07 | 0.7     |
| ENSG00000137449 | CPEB2   | 5.43    | 16.06   | 2.96   | NS       | 17.1    | 5.93    | 16.46   | 2.77   | NS       | 23.8    |
| ENSG00000168036 | CTNNB1  | 32.31   | 339.00  | 10.49  | NS       | 2.1     | 28.64   | 314.71  | 10.99  | NS       | 1.4     |
| ENSG00000161921 | CXCL16  | 12.05   | 11.82   | 0.98   | 6.90E-03 | 2.8     | 5.33    | 10.45   | 1.96   | 4.30E-03 | 7.6     |
| ENSG00000001630 | CYP51A1 | 56.30   | 42.22   | 0.75   | 6.00E-04 | 0.5     | 76.79   | 59.42   | 0.77   | 2.00E-03 | 0.6     |

|                 |                |        |        |        |          |      |        |        |         |          |      |
|-----------------|----------------|--------|--------|--------|----------|------|--------|--------|---------|----------|------|
| ENSG00000172893 | <b>DHCR7</b>   | 54.07  | 9.52   | 0.18   | 0.00E+00 | 0.1  | 57.04  | 35.68  | 0.63    | 1.10E-03 | 0.4  |
| ENSG00000147155 | <b>EBP</b>     | 147.24 | 27.70  | 0.19   | 1.00E-04 | 0.4  | 162.11 | 43.59  | 0.27    | 3.00E-04 | 0.6  |
| ENSG00000104823 | <b>ECH1</b>    | 172.35 | 52.06  | 0.30   | 4.18E-06 | 0.7  | 215.23 | 70.43  | 0.33    | 0.00E+00 | 0.8  |
| ENSG00000116285 | <b>ERRF11</b>  | 219.19 | 654.42 | 2.99   | 8.00E-03 | 9.5  | 299.96 | 673.86 | 2.25    | 8.70E-03 | 9.1  |
| ENSG00000105755 | <b>ETHE1</b>   | 22.33  | 43.94  | 1.97   | 7.60E-03 | 2.6  | 18.11  | 41.26  | 2.28    | 5.10E-03 | 2.7  |
| ENSG00000164687 | <b>FABP5</b>   | 0.25   | 13.37  | 54.14  | 4.00E-04 | 0.1  | 0.32   | 29.89  | 93.00   | 1.00E-04 | 0.3  |
| ENSG00000134824 | <b>FADS2</b>   | 35.62  | 10.14  | 0.28   | 1.30E-03 | 0.1  | 29.15  | 45.89  | 1.57    | NS       | 0.2  |
| ENSG00000135842 | <b>FAM129A</b> | 0.58   | 66.41  | 114.44 | 6.00E-04 | 2.9  | 0.17   | 40.68  | 243.72  | 1.60E-03 | 2.0  |
| ENSG00000169710 | <b>FASN</b>    | 47.98  | 71.52  | 1.49   | 9.80E-03 | 0.2  | 132.73 | 113.10 | 0.85    | NS       | 0.3  |
| ENSG00000116663 | <b>FBXO6</b>   | 8.16   | 18.18  | 2.23   | 4.70E-03 | 32.5 | 6.93   | 23.87  | 3.44    | NS       | 22.2 |
| ENSG00000079459 | <b>FDFT1</b>   | 13.70  | 93.15  | 6.80   | NS       | 0.5  | 28.64  | 83.14  | 2.90    | NS       | 0.4  |
| ENSG00000160752 | <b>FDPS</b>    | 123.69 | 50.11  | 0.41   | 3.10E-03 | 0.3  | 109.04 | 71.74  | 0.66    | 7.20E-03 | 0.4  |
| ENSG00000178445 | <b>GLDC</b>    | 49.51  | 28.24  | 0.57   | 0.00E+00 | 0.3  | 36.34  | 69.71  | 1.92    | 2.10E-03 | 0.8  |
| ENSG00000127955 | <b>GNAH1</b>   | 6.59   | 17.41  | 2.64   | 4.80E-03 | 1.5  | 8.17   | 20.29  | 2.49    | NS       | 1.6  |
| ENSG00000164294 | <b>GPX8</b>    | 0.44   | 90.42  | 204.64 | 0.00E+00 | 2.6  | 0.23   | 92.80  | 400.20  | 0.00E+00 | 2.1  |
| ENSG00000213366 | <b>GSTM2</b>   | 33.51  | 0.99   | 0.03   | 2.70E-03 | 0.4  | 5.89   | 2.63   | 0.45    | 9.40E-03 | 1.0  |
| ENSG00000169919 | <b>GUSB</b>    | 48.77  | 41.66  | 0.85   | 0.00E+00 | 1.6  | 39.45  | 44.71  | 1.13    | 1.00E-04 | 1.6  |
| ENSG00000113161 | <b>HMGCR</b>   | 6.57   | 47.49  | 7.23   | NS       | 0.3  | 11.27  | 63.72  | 5.66    | NS       | 0.4  |
| ENSG00000112972 | <b>HMGS1</b>   | 27.60  | 39.38  | 1.43   | 1.50E-03 | 0.2  | 95.73  | 68.95  | 0.72    | 7.00E-03 | 0.2  |
| ENSG00000132196 | <b>HSD17B7</b> | 5.40   | 5.18   | 0.96   | 2.00E-04 | 0.5  | 10.19  | 5.09   | 0.50    | 3.00E-04 | 0.8  |
| ENSG00000067064 | <b>IDI1</b>    | 28.99  | 28.70  | 0.99   | 2.00E-04 | 0.3  | 58.11  | 47.73  | 0.82    | 2.20E-03 | 0.5  |
| ENSG00000101384 | <b>JAG1</b>    | 1.63   | 22.79  | 14.02  | NS       | 1.8  | 0.98   | 33.54  | 34.14   | 5.10E-03 | 2.8  |
| ENSG00000130164 | <b>LDLR</b>    | 2.44   | 76.32  | 31.33  | NS       | 1.8  | 5.97   | 30.68  | 5.14    | NS       | 0.7  |
| ENSG00000131981 | <b>LGALS3</b>  | 4.18   | 85.85  | 20.56  | 1.40E-03 | 19.9 | 2.04   | 97.56  | 47.71   | 5.90E-03 | 17.7 |
| ENSG00000100600 | <b>LGMN</b>    | 22.16  | 64.88  | 2.93   | NS       | 1.7  | 19.00  | 74.32  | 3.91    | NS       | 1.3  |
| ENSG00000175445 | <b>LPL</b>     | 0.08   | 44.52  | 532.69 | 7.00E-04 | 6.4  | 0.00   | 24.00  | 5041.67 | 3.30E-03 | 2.3  |
| ENSG00000160285 | <b>LSS</b>     | 46.38  | 23.43  | 0.51   | 1.00E-03 | 0.3  | 53.37  | 42.15  | 0.79    | 6.00E-03 | 0.5  |
| ENSG00000167508 | <b>MVD</b>     | 5.20   | 11.33  | 2.18   | NS       | 0.4  | 17.98  | 23.85  | 1.33    | NS       | 0.5  |
| ENSG00000110921 | <b>MVK</b>     | 8.59   | 6.45   | 0.75   | 3.00E-04 | 1.1  | 15.07  | 6.85   | 0.45    | 5.00E-04 | 1.0  |
| ENSG00000165030 | <b>NFIL3</b>   | 12.40  | 104.97 | 8.46   | NS       | 6.7  | 7.14   | 84.18  | 11.79   | NS       | 5.0  |
| ENSG00000147383 | <b>NSDHL</b>   | 13.39  | 31.03  | 2.32   | 6.20E-03 | 0.6  | 24.15  | 43.09  | 1.78    | NS       | 0.8  |
| ENSG00000185813 | <b>PCYT2</b>   | 35.69  | 15.16  | 0.42   | 1.00E-04 | 1.1  | 43.05  | 43.36  | 1.01    | 4.80E-03 | 3.1  |
| ENSG00000067992 | <b>PDK3</b>    | 1.05   | 5.91   | 5.62   | NS       | 0.4  | 0.68   | 7.67   | 11.27   | NS       | 0.5  |

|                 |           |        |         |        |          |       |        |         |        |          |       |
|-----------------|-----------|--------|---------|--------|----------|-------|--------|---------|--------|----------|-------|
| ENSG0000011422  | PLAUR     | 0.31   | 45.46   | 148.18 | 1.00E-04 | 6.4   | 0.08   | 10.44   | 123.99 | NS       | 1.0   |
| ENSG00000188313 | PLSCR1    | 3.74   | 67.71   | 18.10  | NS       | 3.9   | 3.26   | 50.38   | 15.44  | NS       | 2.7   |
| ENSG00000163344 | PMVK      | 45.55  | 28.92   | 0.63   | 0.00E+00 | 0.7   | 51.46  | 44.98   | 0.87   | 2.00E-04 | 1.3   |
| ENSG00000146278 | PNRC1     | 28.12  | 33.02   | 1.17   | 2.00E-04 | 2.2   | 19.53  | 29.68   | 1.52   | 4.00E-04 | 2.3   |
| ENSG00000132170 | PPARG     | 2.43   | 15.37   | 6.34   | NS       | 117.0 | 2.97   | 10.43   | 3.51   | NS       | 107.0 |
| ENSG00000163191 | SI00A11   | 24.52  | 3158.97 | 128.81 | 9.71E-06 | 12.0  | 12.42  | 1898.00 | 152.78 | 1.00E-04 | 7.0   |
| ENSG00000099194 | SCD       | 586.39 | 21.85   | 0.04   | 0.00E+00 | 0.0   | 361.18 | 168.63  | 0.47   | 1.00E-03 | 0.2   |
| ENSG00000012171 | SEMA3B    | 2.02   | 1.28    | 0.63   | NS       | 0.7   | 1.78   | 7.15    | 4.02   | NS       | 4.2   |
| ENSG00000104549 | SQLE      | 2.06   | 35.04   | 16.97  | NS       | 0.3   | 10.33  | 42.15   | 4.08   | NS       | 0.3   |
| ENSG00000198911 | SREBF2    | 15.99  | 64.67   | 4.04   | NS       | 0.6   | 27.88  | 117.29  | 4.21   | NS       | 1.1   |
| ENSG00000164211 | STARD4    | 5.14   | 21.75   | 4.23   | NS       | 0.5   | 9.08   | 32.58   | 3.59   | NS       | 0.7   |
| ENSG00000162236 | STX5      | 15.87  | 86.90   | 5.48   | NS       | 3.8   | 21.64  | 80.21   | 3.71   | NS       | 3.0   |
| ENSG00000149809 | TM7SF2    | 41.70  | 6.32    | 0.15   | 0.00E+00 | 0.4   | 54.64  | 16.98   | 0.31   | 1.00E-04 | 0.6   |
| ENSG00000109084 | TMEM97    | 39.46  | 195.66  | 4.96   | NS       | 1.5   | 44.19  | 148.19  | 3.35   | NS       | 1.0   |
| ENSG00000006327 | TNFRSF12A | 1.48   | 284.84  | 192.49 | 2.44E-06 | 4.7   | 0.95   | 228.89  | 241.42 | 4.59E-06 | 4.2   |
| ENSG00000164938 | TP53INP1  | 42.38  | 65.36   | 1.54   | 6.20E-03 | 6.2   | 31.31  | 117.26  | 3.75   | NS       | 12.7  |
| ENSG00000101255 | TRIB3     | 8.67   | 118.04  | 13.62  | 6.00E-04 | 12.4  | 7.53   | 98.69   | 13.10  | 4.60E-03 | 6.2   |

### Hallmark Glycolysis

|                 |         |         |        |        |          |         |         |       |       |          |     |
|-----------------|---------|---------|--------|--------|----------|---------|---------|-------|-------|----------|-----|
| ENSG00000115657 | ABCB6   | 9.48    | 17.33  | 1.83   | 1.10E-03 | 1.0     | 0.68    | 7.67  | 11.27 | NS       | 0.5 |
| ENSG00000170425 | ADORA2B | 0.03    | 9.37   | 326.20 | 5.00E-04 | 2.9     | 1.46    | 48.13 | 33.00 | 4.30E-03 | 3.5 |
| ENSG00000162688 | AGL     | 14.73   | 15.42  | 1.05   | 1.30E-03 | 0.9     | 13.53   | 41.65 | 3.08  | NS       | 3.2 |
| ENSG00000188157 | AGRN    | 8.71    | 73.23  | 8.41   | NS       | 1.6     | 0.30    | 6.19  | 20.29 | 3.80E-03 | 0.5 |
| ENSG00000147853 | AK3     | 61.90   | 70.65  | 1.14   | 1.00E-04 | 2.1     | 9.07    | 10.03 | 1.11  | 6.00E-04 | 6.7 |
| ENSG00000162433 | AK4     | 32.04   | 4.41   | 0.14   | 2.17E-07 | 0.1     | 9.26    | 40.09 | 4.33  | NS       | 2.0 |
| ENSG00000117448 | AKRIA1  | 122.26  | 63.01  | 0.52   | 1.00E-04 | 0.5     | 89.10   | 72.28 | 0.81  | 2.00E-04 | 0.8 |
| ENSG00000164904 | ALDH7A1 | 43.55   | 24.47  | 0.56   | 7.35E-06 | 0.4     | 6.54    | 3.58  | 0.55  | 0.00E+00 | 4.5 |
| ENSG00000143149 | ALDH9A1 | 80.16   | 75.13  | 0.94   | 0.00E+00 | 0.9     | 12.72   | 14.37 | 1.13  | 0.00E+00 | 2.7 |
| ENSG00000149925 | ALDOA   | 15.46   | 301.59 | 19.51  | 0.00E+00 | 1.0     | 0.65    | 17.41 | 26.90 | 2.00E-04 | 3.5 |
| ENSG00000136872 | ALDOB   | 4282.19 | 0.16   | 0.00   | 1.72E-09 | #DIV/0! | 3707.62 | 0.99  | 0.00  | 1.42E-09 | 1.5 |
| ENSG00000033011 | ALG1    | 3.19    | 11.20  | 3.51   | NS       | 0.6     | 23.83   | 87.79 | 3.68  | NS       | 0.6 |
| ENSG00000214274 | ANG     | 548.51  | 2.55   | 0.00   | 7.74E-09 | 0.9     | 710.63  | 7.80  | 0.01  | 6.41E-08 | 3.0 |
| ENSG00000167772 | ANGPTL4 | 9.42    | 83.96  | 8.91   | NS       | 72.2    | 11.65   | 22.88 | 1.96  | NS       | 1.3 |
| ENSG00000163516 | ANKZF1  | 13.26   | 33.88  | 2.56   | NS       | 1.6     | 4.32    | 6.29  | 1.46  | NS       | 0.9 |

|                 |                |       |        |        |          |      |        |        |        |          |      |
|-----------------|----------------|-------|--------|--------|----------|------|--------|--------|--------|----------|------|
| ENSG00000128989 | <b>ARPP19</b>  | 8.43  | 148.54 | 17.62  | 1.50E-03 | 1.2  | 2.47   | 78.78  | 31.91  | 1.90E-03 | 10.6 |
| ENSG00000117407 | <b>ARTN</b>    | 0.05  | 0.66   | 14.26  | NS       | 0.1  | 0.09   | 0.92   | 10.71  | NS       | 0.2  |
| ENSG00000087586 | <b>AURKA</b>   | 0.61  | 26.49  | 43.51  | 1.00E-04 | 0.4  | 28.23  | 514.46 | 18.23  | 3.00E-04 | 19.2 |
| ENSG00000176022 | <b>B3GALT6</b> | 5.12  | 21.19  | 4.14   | NS       | 1.6  | 72.17  | 419.93 | 5.82   | NS       | 85.5 |
| ENSG00000109956 | <b>B3GAT1</b>  | 1.21  | 0.40   | 0.33   | 0.00E+00 | 0.0  | 124.93 | 408.41 | 3.27   | NS       | 0.7  |
| ENSG00000149541 | <b>B3GAT3</b>  | 12.63 | 32.36  | 2.56   | NS       | 1.8  | 3.70   | 16.94  | 4.58   | NS       | 0.8  |
| ENSG00000179913 | <b>B3GNT3</b>  | 0.52  | 3.61   | 6.95   | NS       | 1.6  | 1.45   | 11.87  | 8.17   | NS       | 0.5  |
| ENSG00000086062 | <b>B4GALT1</b> | 25.34 | 149.78 | 5.91   | NS       | 8.5  | 7.81   | 49.04  | 6.28   | NS       | 3.0  |
| ENSG00000117411 | <b>B4GALT2</b> | 11.42 | 44.93  | 3.94   | NS       | 1.1  | 17.15  | 25.00  | 1.46   | NS       | 1.2  |
| ENSG00000121578 | <b>B4GALT4</b> | 3.43  | 41.85  | 12.20  | 3.00E-04 | 1.8  | 0.39   | 4.42   | 11.23  | 1.00E-03 | 0.4  |
| ENSG00000027847 | <b>B4GALT7</b> | 4.29  | 12.41  | 2.89   | NS       | 1.6  | 17.54  | 24.04  | 1.37   | NS       | 1.5  |
| ENSG00000100290 | <b>BIK</b>     | 0.33  | 4.93   | 14.80  | NS       | 1.7  | 0.02   | 6.58   | 300.85 | NS       | 2.6  |
| ENSG00000162813 | <b>BPNT1</b>   | 8.38  | 17.84  | 2.13   | 1.30E-03 | 1.3  | 29.96  | 47.67  | 1.59   | NS       | 3.8  |
| ENSG00000196557 | <b>CACNA1H</b> | 18.99 | 1.00   | 0.05   | 1.78E-06 | 0.1  | 36.88  | 3.85   | 0.10   | 0.00E+00 | 0.2  |
| ENSG00000149260 | <b>CAPN5</b>   | 22.69 | 10.48  | 0.46   | 3.40E-06 | 0.6  | 28.65  | 15.06  | 0.53   | 0.00E+00 | 0.8  |
| ENSG00000138794 | <b>CASP6</b>   | 9.96  | 35.10  | 3.52   | NS       | 1.5  | 5.18   | 26.34  | 5.09   | NS       | 1.7  |
| ENSG00000026508 | <b>CD44</b>    | 1.45  | 63.99  | 44.23  | 7.80E-03 | 11.3 | 1.29   | 25.34  | 19.68  | NS       | 14.8 |
| ENSG00000170312 | <b>CDK1</b>    | 0.31  | 52.56  | 169.24 | 2.00E-04 | 0.7  | 0.07   | 56.15  | 755.85 | 2.00E-04 | 0.7  |
| ENSG00000115163 | <b>CENPA</b>   | 0.11  | 16.29  | 147.01 | 0.00E+00 | 0.7  | 0.03   | 16.79  | 531.95 | 1.00E-04 | 0.9  |
| ENSG00000123989 | <b>CHPF</b>    | 22.19 | 89.89  | 4.05   | NS       | 1.6  | 6.66   | 20.21  | 3.03   | NS       | 1.6  |
| ENSG00000033100 | <b>CHPF2</b>   | 7.48  | 34.87  | 4.66   | NS       | 1.7  | 4.77   | 35.72  | 7.49   | NS       | 1.5  |
| ENSG00000175264 | <b>CHST1</b>   | 0.52  | 5.47   | 10.53  | 2.60E-03 | 3.8  | 17.08  | 42.83  | 2.51   | NS       | 20.0 |
| ENSG00000136213 | <b>CHST12</b>  | 2.44  | 9.09   | 3.72   | NS       | 1.0  | 1.43   | 14.17  | 9.89   | NS       | 0.6  |
| ENSG00000175040 | <b>CHST2</b>   | 0.42  | 2.47   | 5.95   | NS       | 0.2  | 7.77   | 175.45 | 22.59  | NS       | 1.4  |
| ENSG00000140835 | <b>CHST4</b>   | 1.08  | 0.02   | 0.01   | 7.28E-07 | 0.0  | 0.75   | 0.03   | 0.05   | 5.67E-06 | 0.0  |
| ENSG00000183196 | <b>CHST6</b>   | 0.00  | 0.35   | 120.79 | 0.00E+00 | 0.0  | 0.00   | 0.49   | 200.44 | 0.00E+00 | 0.0  |
| ENSG00000164442 | <b>CITED2</b>  | 23.57 | 191.12 | 8.11   | NS       | 3.0  | 0.15   | 1.08   | 7.46   | NS       | 0.4  |
| ENSG00000165215 | <b>CLDN3</b>   | 16.86 | 3.50   | 0.21   | 0.00E+00 | 0.2  | 569.21 | 148.84 | 0.26   | 1.00E-04 | 0.9  |
| ENSG00000213937 | <b>CLDN9</b>   | 6.28  | 5.00   | 0.80   | NS       | 1.6  | 115.24 | 81.65  | 0.71   | NS       | 0.7  |
| ENSG00000128973 | <b>CLN6</b>    | 5.64  | 44.32  | 7.86   | NS       | 0.9  | 8.19   | 37.82  | 4.62   | NS       | 1.3  |
| ENSG00000135775 | <b>COG2</b>    | 1.70  | 9.24   | 5.44   | NS       | 0.8  | 129.51 | 491.81 | 3.80   | NS       | 1.6  |
| ENSG00000130635 | <b>COL5A1</b>  | 1.95  | 505.09 | 258.91 | 1.07E-06 | 52.7 | 0.17   | 72.40  | 430.69 | 2.20E-03 | 4.1  |
| ENSG00000184432 | <b>COPB2</b>   | 10.89 | 79.60  | 7.31   | NS       | 1.4  | 1.79   | 10.81  | 6.05   | NS       | 0.6  |

|                 |                |       |        |        |          |      |        |        |         |          |       |
|-----------------|----------------|-------|--------|--------|----------|------|--------|--------|---------|----------|-------|
| ENSG00000116761 | <b>CTH</b>     | 23.60 | 60.01  | 2.54   | 7.00E-03 | 2.2  | 6.00   | 27.33  | 4.55    | NS       | 2.3   |
| ENSG00000121966 | <b>CXCR4</b>   | 1.51  | 1.22   | 0.80   | 6.00E-04 | 0.5  | 3.14   | 45.06  | 14.34   | NS       | 2.8   |
| ENSG00000166347 | <b>CYB5A</b>   | 99.96 | 6.56   | 0.07   | 1.59E-07 | 0.4  | 117.69 | 16.00  | 0.14    | 3.65E-06 | 0.9   |
| ENSG00000011465 | <b>DCN</b>     | 16.72 | 2.79   | 0.17   | 2.00E-04 | 9.4  | 0.69   | 0.25   | 0.36    | 1.00E-04 | 0.4   |
| ENSG00000168209 | <b>DDIT4</b>   | 28.76 | 911.04 | 31.68  | 1.00E-04 | 47.5 | 4.85   | 43.65  | 9.00    | 1.90E-03 | 5.5   |
| ENSG00000024526 | <b>DEPDC1</b>  | 0.06  | 12.15  | 195.82 | 0.00E+00 | 0.5  | 0.04   | 9.03   | 232.48  | 2.00E-04 | 0.3   |
| ENSG00000091140 | <b>DLD</b>     | 18.16 | 68.13  | 3.75   | NS       | 1.3  | 3.99   | 16.31  | 4.09    | NS       | 1.1   |
| ENSG00000151640 | <b>DPYSL4</b>  | 0.19  | 4.98   | 25.90  | 1.70E-03 | 0.2  | 0.05   | 28.55  | 620.96  | 4.00E-04 | 1.3   |
| ENSG00000134755 | <b>DSC2</b>    | 1.10  | 58.68  | 53.19  | 2.00E-04 | 3.9  | 1.43   | 103.91 | 72.46   | 3.00E-04 | 2.3   |
| ENSG00000122882 | <b>ECD</b>     | 5.01  | 34.41  | 6.87   | NS       | 0.7  | 2.09   | 23.84  | 11.41   | NS       | 2.8   |
| ENSG00000143590 | <b>EFNA3</b>   | 0.27  | 1.73   | 6.43   | NS       | 0.2  | 23.01  | 227.23 | 9.88    | NS       | 3.5   |
| ENSG00000146648 | <b>EGFR</b>    | 13.47 | 60.53  | 4.49   | NS       | 24.7 | 2.53   | 6.51   | 2.57    | NS       | 1.5   |
| ENSG00000129521 | <b>EGLN3</b>   | 0.16  | 0.30   | 1.90   | NS       | 0.0  | 0.09   | 11.12  | 130.76  | NS       | 0.9   |
| ENSG00000163435 | <b>ELF3</b>    | 3.81  | 6.76   | 1.77   | NS       | 1.0  | 13.16  | 57.68  | 4.38    | NS       | 2.0   |
| ENSG00000074800 | <b>ENO1</b>    | 94.71 | 811.54 | 8.57   | NS       | 0.6  | 13.24  | 121.50 | 9.18    | 6.40E-03 | 2.4   |
| ENSG00000111674 | <b>ENO2</b>    | 1.65  | 5.52   | 3.34   | NS       | 0.1  | 0.64   | 64.90  | 101.05  | NS       | 1.1   |
| ENSG00000182197 | <b>EXT1</b>    | 7.16  | 59.75  | 8.34   | NS       | 4.8  | 9.22   | 115.50 | 12.53   | NS       | 2.4   |
| ENSG00000151348 | <b>EXT2</b>    | 7.28  | 75.44  | 10.36  | NS       | 2.1  | 7.30   | 42.39  | 5.81    | NS       | 0.9   |
| ENSG00000114023 | <b>FAM162A</b> | 25.72 | 8.74   | 0.34   | 0.00E+00 | 0.4  | 28.90  | 15.34  | 0.53    | 1.00E-04 | 0.6   |
| ENSG00000004478 | <b>FKBP4</b>   | 13.76 | 110.85 | 8.06   | NS       | 0.8  | 0.46   | 1.17   | 2.53    | NS       | 1.8   |
| ENSG00000033170 | <b>FUT8</b>    | 0.37  | 105.12 | 282.81 | 1.00E-04 | 11.3 | 0.32   | 470.42 | 1491.26 | 3.00E-04 | 4.7   |
| ENSG00000160211 | <b>G6PD</b>    | 1.69  | 84.74  | 50.09  | 6.05E-06 | 2.0  | 0.15   | 3.70   | 25.14   | 7.81E-06 | 1.1   |
| ENSG00000128242 | <b>GAL3ST1</b> | 1.55  | 0.31   | 0.20   | 1.20E-03 | 0.1  | 125.10 | 176.61 | 1.41    | NS       | 0.5   |
| ENSG00000117308 | <b>GALE</b>    | 19.78 | 62.24  | 3.15   | NS       | 5.3  | 0.81   | 2.82   | 3.49    | NS       | 0.2   |
| ENSG00000108479 | <b>GALK1</b>   | 59.61 | 9.81   | 0.16   | 1.91E-06 | 0.8  | 36.26  | 9.69   | 0.27    | 3.24E-06 | 1.1   |
| ENSG00000156958 | <b>GALK2</b>   | 2.45  | 7.85   | 3.20   | NS       | 1.8  | 32.26  | 47.59  | 1.48    | 8.90E-03 | 2.0   |
| ENSG00000001084 | <b>GCLC</b>    | 22.08 | 18.19  | 0.82   | 0.00E+00 | 0.8  | 11.50  | 28.10  | 2.44    | 1.40E-03 | 5.4   |
| ENSG00000198380 | <b>GFPT1</b>   | 3.95  | 136.85 | 34.65  | 1.60E-03 | 2.7  | 1.00   | 31.13  | 31.14   | 1.60E-03 | 3.5   |
| ENSG00000138604 | <b>GLCE</b>    | 4.52  | 7.19   | 1.59   | 5.00E-03 | 0.8  | 43.91  | 101.34 | 2.31    | 2.90E-03 | 1.9   |
| ENSG00000173221 | <b>GLRX</b>    | 13.79 | 4.79   | 0.35   | 3.92E-06 | 1.0  | 26.65  | 42.87  | 1.61    | 3.10E-03 | 1.8   |
| ENSG00000144591 | <b>GMPPA</b>   | 9.72  | 21.56  | 2.22   | NS       | 1.5  | 55.54  | 98.87  | 1.78    | NS       | 3.6   |
| ENSG00000173540 | <b>GMPPB</b>   | 3.50  | 17.12  | 4.89   | NS       | 1.3  | 31.13  | 102.58 | 3.29    | NS       | 0.7   |
| ENSG00000159921 | <b>GNE</b>     | 45.35 | 10.86  | 0.24   | 5.03E-06 | 1.0  | 8.53   | 4.29   | 0.50    | 8.74E-06 | 104.9 |



|                 |                |        |        |         |          |       |        |         |         |          |       |
|-----------------|----------------|--------|--------|---------|----------|-------|--------|---------|---------|----------|-------|
| ENSG00000113552 | <b>GNPDA1</b>  | 5.31   | 127.08 | 23.92   | 0.00E+00 | 1.6   | 3.90   | 174.07  | 44.67   | 0.00E+00 | 2.2   |
| ENSG00000120053 | <b>GOT1</b>    | 100.17 | 156.18 | 1.56    | 3.00E-04 | 2.6   | 18.86  | 16.79   | 0.89    | 2.00E-04 | 1.1   |
| ENSG00000125166 | <b>GOT2</b>    | 108.15 | 88.16  | 0.82    | 0.00E+00 | 0.5   | 162.47 | 108.38  | 0.67    | 1.00E-04 | 0.5   |
| ENSG00000063660 | <b>GPC1</b>    | 7.18   | 39.18  | 5.46    | NS       | 2.5   | 8.48   | 46.42   | 5.47    | NS       | 1.1   |
| ENSG00000147257 | <b>GPC3</b>    | 1.68   | 36.42  | 21.62   | 4.20E-03 | 0.3   | 0.34   | 142.72  | 424.23  | 2.00E-04 | 1.9   |
| ENSG00000076716 | <b>GPC4</b>    | 0.56   | 45.10  | 80.37   | 0.00E+00 | 0.2   | 0.30   | 49.05   | 163.89  | 2.00E-04 | 2.9   |
| ENSG00000138271 | <b>GPR87</b>   | 0.08   | 97.26  | 1281.04 | 2.97E-06 | 187.5 | 0.01   | 87.77   | 6766.40 | 4.16E-06 | 430.0 |
| ENSG00000169919 | <b>GUSB</b>    | 48.77  | 41.66  | 0.85    | 0.00E+00 | 1.6   | 12.87  | 38.45   | 2.99    | 1.00E-04 | 2.2   |
| ENSG00000104812 | <b>GYS1</b>    | 8.59   | 30.05  | 3.50    | NS       | 1.0   | 21.32  | 81.13   | 3.81    | NS       | 1.5   |
| ENSG00000111713 | <b>GYS2</b>    | 99.32  | 0.10   | 0.00    | 8.55E-09 | 0.6   | 68.29  | 0.29    | 0.00    | 7.81E-08 | 2.1   |
| ENSG00000143575 | <b>HAX1</b>    | 29.75  | 128.37 | 4.31    | NS       | 2.6   | 13.06  | 50.71   | 3.88    | NS       | 2.6   |
| ENSG00000115677 | <b>HDLBP</b>   | 43.63  | 174.45 | 4.00    | NS       | 1.5   | 26.53  | 172.82  | 6.51    | NS       | 0.8   |
| ENSG00000159399 | <b>HK2</b>     | 0.12   | 64.11  | 513.67  | 4.00E-04 | 1.1   | 0.09   | 70.20   | 755.89  | 4.00E-04 | 1.2   |
| ENSG00000072571 | <b>HMMR</b>    | 0.35   | 17.59  | 50.63   | 1.00E-04 | 0.3   | 0.87   | 61.92   | 71.32   | 1.00E-03 | 3.3   |
| ENSG00000152413 | <b>HOMER1</b>  | 0.18   | 12.31  | 67.43   | 7.00E-04 | 0.4   | 0.05   | 14.72   | 289.58  | 6.00E-04 | 0.4   |
| ENSG00000153936 | <b>HS2ST1</b>  | 5.17   | 21.83  | 4.23    | NS       | 0.9   | 0.88   | 16.83   | 19.09   | NS       | 5.3   |
| ENSG00000171004 | <b>HS6ST2</b>  | 0.00   | 3.08   | 623.31  | 5.63E-06 | 0.4   | 0.02   | 12.67   | 751.50  | 2.56E-06 | 2.0   |
| ENSG00000044574 | <b>HSPA5</b>   | 62.71  | 682.50 | 10.88   | NS       | 1.4   | 2.78   | 34.02   | 12.24   | NS       | 2.4   |
| ENSG00000138413 | <b>IDH1</b>    | 130.12 | 76.64  | 0.59    | 8.11E-06 | 0.3   | 8.75   | 18.05   | 2.06    | 1.20E-03 | 2.0   |
| ENSG00000127415 | <b>IDUA</b>    | 6.63   | 2.73   | 0.41    | NS       | 3.1   | 96.66  | 97.54   | 1.01    | NS       | 0.4   |
| ENSG00000137331 | <b>IER3</b>    | 1.60   | 33.86  | 21.13   | 4.00E-04 | 4.1   | 20.30  | 160.26  | 7.89    | 2.10E-03 | 25.7  |
| ENSG00000146674 | <b>IGFBP3</b>  | 105.99 | 669.73 | 6.32    | NS       | 110.2 | 2.10   | 11.68   | 5.56    | NS       | 1.0   |
| ENSG00000131724 | <b>IL13RA1</b> | 55.02  | 64.87  | 1.18    | 1.00E-04 | 6.8   | 73.71  | 101.25  | 1.37    | 2.00E-04 | 1.1   |
| ENSG00000185950 | <b>IRS2</b>    | 2.87   | 67.71  | 23.56   | 1.00E-03 | 6.9   | 1.43   | 14.54   | 10.16   | NS       | 1.3   |
| ENSG00000172183 | <b>ISG20</b>   | 0.48   | 2.20   | 4.54    | NS       | 3.1   | 0.58   | 2.64    | 4.55    | NS       | 0.8   |
| ENSG00000100196 | <b>KDELR3</b>  | 8.06   | 12.74  | 1.58    | NS       | 1.1   | 118.56 | 1254.64 | 10.58   | NS       | 0.9   |
| ENSG00000112984 | <b>KIF20A</b>  | 0.13   | 18.64  | 143.87  | 8.00E-04 | 0.3   | 0.05   | 13.87   | 292.36  | 2.30E-03 | 0.2   |
| ENSG00000068796 | <b>KIF2A</b>   | 0.96   | 58.43  | 61.10   | 5.00E-04 | 1.1   | 1.29   | 72.75   | 56.25   | 5.00E-04 | 6.9   |
| ENSG00000115850 | <b>LCT</b>     | 0.00   | 0.23   | 60.90   | 2.55E-06 | 7.4   | 0.00   | 0.11    | 35.71   | 4.00E-04 | 7.6   |
| ENSG00000134333 | <b>LDHA</b>    | 76.76  | 111.88 | 1.46    | 2.00E-04 | 0.5   | 46.97  | 61.84   | 1.32    | 2.00E-04 | 5.6   |
| ENSG00000166796 | <b>LDHC</b>    | 1.61   | 0.41   | 0.25    | NS       | 0.4   | 1.29   | 0.22    | 0.17    | NS       | 0.2   |
| ENSG00000107902 | <b>LHPP</b>    | 17.24  | 3.73   | 0.22    | 2.19E-06 | 0.4   | 18.64  | 6.35    | 0.34    | 0.00E+00 | 0.5   |
| ENSG00000143355 | <b>LHX9</b>    | 0.11   | 0.00   | 0.00    | 0.00E+00 | 0.0   | 0.04   | 0.67    | 18.56   | NS       | 16.1  |

|                  |               |       |        |        |          |      |        |        |        |          |      |
|------------------|---------------|-------|--------|--------|----------|------|--------|--------|--------|----------|------|
| ENSG00000014641  | <b>MDH1</b>   | 29.38 | 72.08  | 2.45   | 2.00E-03 | 0.5  | 5.99   | 18.92  | 3.16   | NS       | 0.8  |
| ENSG000000146701 | <b>MDH2</b>   | 50.71 | 106.63 | 2.10   | 7.00E-04 | 0.7  | 49.98  | 122.38 | 2.45   | 2.80E-03 | 0.8  |
| ENSG000000065833 | <b>ME1</b>    | 3.30  | 38.69  | 11.72  | 2.50E-03 | 5.0  | 4.34   | 186.60 | 43.04  | 3.00E-04 | 11.2 |
| ENSG000000082212 | <b>ME2</b>    | 1.83  | 14.31  | 7.83   | NS       | 0.5  | 1.93   | 65.80  | 34.14  | NS       | 2.2  |
| ENSG000000008838 | <b>MED24</b>  | 8.36  | 38.11  | 4.56   | NS       | 0.9  | 125.79 | 616.12 | 4.90   | NS       | 1.1  |
| ENSG000000153208 | <b>MERTK</b>  | 3.93  | 40.75  | 10.38  | NS       | 6.6  | 23.45  | 170.46 | 7.27   | NS       | 9.8  |
| ENSG000000105976 | <b>MET</b>    | 14.53 | 52.96  | 3.64   | NS       | 5.4  | 78.77  | 130.61 | 1.66   | NS       | 0.6  |
| ENSG000000240972 | <b>MIF</b>    | 50.35 | 111.56 | 2.22   | 5.30E-03 | 0.5  | 16.55  | 10.38  | 0.63   | NS       | 5.5  |
| ENSG000000100253 | <b>MIOX</b>   | 0.29  | 3.40   | 11.91  | NS       | 12.1 | 27.64  | 135.98 | 4.92   | NS       | 1.0  |
| ENSG000000178802 | <b>MPI</b>    | 3.62  | 4.83   | 1.34   | 1.00E-04 | 0.7  | 42.62  | 46.01  | 1.08   | 3.00E-04 | 6.2  |
| ENSG000000119950 | <b>MX11</b>   | 10.51 | 15.03  | 1.43   | 4.00E-04 | 2.7  | 24.15  | 43.09  | 1.78   | NS       | 0.8  |
| ENSG000000170191 | <b>NANP</b>   | 1.58  | 12.18  | 7.69   | NS       | 1.2  | 3.77   | 55.35  | 14.68  | NS       | 4.4  |
| ENSG000000132780 | <b>NASP</b>   | 12.80 | 70.33  | 5.49   | NS       | 0.2  | 1.74   | 13.59  | 7.81   | NS       | 1.8  |
| ENSG000000164100 | <b>NDST3</b>  | 0.31  | 2.96   | 9.44   | NS       | 3.9  | 0.04   | 2.81   | 67.49  | NS       | 4.5  |
| ENSG000000160194 | <b>NDUFV3</b> | 9.08  | 15.37  | 1.69   | 2.20E-03 | 0.9  | 8.47   | 18.30  | 2.16   | 6.90E-03 | 1.0  |
| ENSG000000140939 | <b>NOL3</b>   | 11.74 | 12.02  | 1.02   | NS       | 11.2 | 39.45  | 44.71  | 1.13   | NS       | 1.6  |
| ENSG000000147383 | <b>NSDHL</b>  | 13.39 | 31.03  | 2.32   | 6.20E-03 | 0.6  | 17.54  | 35.76  | 2.04   | NS       | 4.9  |
| ENSG000000135318 | <b>NT5E</b>   | 19.79 | 78.19  | 3.95   | NS       | 38.2 | 48.96  | 37.69  | 0.77   | 3.30E-03 | 0.5  |
| ENSG000000122884 | <b>P4HA1</b>  | 3.62  | 40.60  | 11.23  | NS       | 1.6  | 12.04  | 262.38 | 21.80  | NS       | 0.9  |
| ENSG000000072682 | <b>P4HA2</b>  | 1.41  | 20.48  | 14.55  | 1.00E-04 | 9.1  | 2.85   | 77.75  | 27.29  | 3.00E-04 | 3.0  |
| ENSG000000145730 | <b>PAM</b>    | 1.80  | 54.54  | 30.36  | 3.90E-03 | 3.2  | 0.20   | 12.08  | 59.97  | 4.40E-03 | 0.2  |
| ENSG000000157212 | <b>PAXIP1</b> | 1.54  | 10.27  | 6.65   | NS       | 0.5  | 68.19  | 326.46 | 4.79   | NS       | 0.7  |
| ENSG000000173599 | <b>PC</b>     | 39.27 | 3.08   | 0.08   | 6.02E-07 | 0.4  | 62.21  | 10.73  | 0.17   | 8.61E-06 | 0.7  |
| ENSG000000067992 | <b>PDK3</b>   | 1.05  | 5.91   | 5.62   | NS       | 0.4  | 0.41   | 1.17   | 2.82   | NS       | 0.8  |
| ENSG000000158571 | <b>PFKFB1</b> | 45.24 | 0.57   | 0.01   | 9.62E-08 | 1.6  | 47.83  | 0.53   | 0.01   | 1.09E-07 | 1.1  |
| ENSG000000067057 | <b>PFKP</b>   | 0.49  | 203.10 | 410.48 | 2.88E-07 | 3.3  | 1.17   | 253.44 | 216.83 | 1.08E-06 | 27.6 |
| ENSG000000171314 | <b>PGAM1</b>  | 23.53 | 129.13 | 5.49   | NS       | 0.4  | 20.68  | 181.29 | 8.77   | NS       | 0.5  |
| ENSG000000164708 | <b>PGAM2</b>  | 2.25  | 0.04   | 0.02   | 5.00E-04 | 0.0  | 1.63   | 0.21   | 0.13   | 2.70E-03 | 0.1  |
| ENSG000000102144 | <b>PGK1</b>   | 27.69 | 164.38 | 5.94   | NS       | 0.8  | 2.98   | 35.91  | 12.03  | NS       | 0.9  |
| ENSG000000130313 | <b>PGLS</b>   | 12.97 | 69.90  | 5.39   | NS       | 2.9  | 2.03   | 13.59  | 6.70   | NS       | 2.9  |
| ENSG000000169299 | <b>PGM2</b>   | 5.80  | 102.10 | 17.60  | 6.40E-03 | 4.4  | 0.13   | 0.81   | 6.33   | NS       | 4.8  |
| ENSG000000044446 | <b>PHKA2</b>  | 16.85 | 22.66  | 1.34   | 1.00E-04 | 1.4  | 2.37   | 1.93   | 0.81   | 4.00E-04 | 0.3  |
| ENSG000000057294 | <b>PKP2</b>   | 5.62  | 190.88 | 33.95  | 1.00E-03 | 7.5  | 0.69   | 46.60  | 67.36  | 1.90E-03 | 0.8  |

|                 |                 |        |        |         |          |      |        |        |         |          |      |
|-----------------|-----------------|--------|--------|---------|----------|------|--------|--------|---------|----------|------|
| ENSG0000083444  | <b>PLOD1</b>    | 32.39  | 49.67  | 1.53    | 3.00E-04 | 1.5  | 34.20  | 62.46  | 1.83    | 1.50E-03 | 1.7  |
| ENSG00000152952 | <b>PLOD2</b>    | 6.92   | 22.57  | 3.26    | NS       | 1.6  | 8.54   | 24.24  | 2.84    | NS       | 1.9  |
| ENSG00000140650 | <b>PMM2</b>     | 4.32   | 16.67  | 3.86    | NS       | 0.7  | 4.77   | 20.51  | 4.30    | NS       | 0.9  |
| ENSG00000161980 | <b>POLR3K</b>   | 2.96   | 11.68  | 3.95    | NS       | 0.3  | 13.40  | 92.87  | 6.93    | NS       | 1.6  |
| ENSG00000143847 | <b>PPF1A4</b>   | 0.11   | 0.05   | 0.47    | 7.20E-03 | 0.0  | 0.03   | 0.47   | 18.20   | NS       | 0.2  |
| ENSG00000196262 | <b>PPIA</b>     | 72.46  | 326.11 | 4.50    | NS       | 0.7  | 18.56  | 31.54  | 1.70    | NS       | 21.5 |
| ENSG00000104695 | <b>PPP2CB</b>   | 15.06  | 127.15 | 8.44    | NS       | 2.6  | 13.20  | 85.80  | 6.50    | NS       | 0.3  |
| ENSG00000147224 | <b>PRPS1</b>    | 18.35  | 46.99  | 2.56    | 2.20E-03 | 0.2  | 11.13  | 28.08  | 2.52    | 2.10E-03 | 1.9  |
| ENSG00000013275 | <b>PSMC4</b>    | 20.25  | 117.83 | 5.82    | NS       | 0.9  | 6.77   | 42.03  | 6.21    | NS       | 9.0  |
| ENSG00000100994 | <b>PYGB</b>     | 6.35   | 109.30 | 17.21   | 1.00E-04 | 2.0  | 0.46   | 24.63  | 54.03   | 1.60E-03 | 0.3  |
| ENSG00000100504 | <b>PYGL</b>     | 51.08  | 54.29  | 1.06    | 1.00E-04 | 1.6  | 3.06   | 6.11   | 2.00    | 4.90E-03 | 0.5  |
| ENSG00000116260 | <b>QSOX1</b>    | 6.56   | 30.55  | 4.66    | NS       | 1.3  | 3.78   | 104.44 | 27.61   | NS       | 4.0  |
| ENSG00000113643 | <b>RARS</b>     | 14.07  | 92.27  | 6.56    | NS       | 0.9  | 3.14   | 17.71  | 5.65    | NS       | 0.4  |
| ENSG00000125826 | <b>RBCK1</b>    | 30.87  | 67.97  | 2.20    | NS       | 2.9  | 93.50  | 121.49 | 1.30    | NS       | 1.9  |
| ENSG00000197713 | <b>RPE</b>      | 5.53   | 48.72  | 8.82    | NS       | 1.0  | 5.80   | 58.70  | 10.11   | NS       | 1.0  |
| ENSG00000025039 | <b>RRAGD</b>    | 2.27   | 17.86  | 7.86    | NS       | 1.4  | 7.45   | 79.14  | 10.62   | NS       | 2.3  |
| ENSG00000164105 | <b>SAP30</b>    | 1.48   | 9.71   | 6.57    | NS       | 0.4  | 17.92  | 106.53 | 5.95    | NS       | 0.9  |
| ENSG00000115884 | <b>SDC1</b>     | 253.36 | 47.37  | 0.19    | 2.28E-06 | 0.7  | 108.14 | 34.97  | 0.32    | 0.00E+00 | 0.5  |
| ENSG00000169439 | <b>SDC2</b>     | 87.32  | 12.06  | 0.14    | 3.22E-07 | 0.2  | 254.85 | 72.05  | 0.28    | 0.00E+00 | 1.4  |
| ENSG00000162512 | <b>SDC3</b>     | 6.00   | 97.68  | 16.28   | NS       | 4.7  | 6.24   | 219.26 | 35.13   | NS       | 4.6  |
| ENSG00000143252 | <b>SDHC</b>     | 11.70  | 20.81  | 1.78    | 7.00E-04 | 1.1  | 21.70  | 45.68  | 2.10    | 1.30E-03 | 0.3  |
| ENSG00000141526 | <b>SLC16A3</b>  | 0.49   | 45.34  | 92.28   | 0.00E+00 | 67.5 | 0.27   | 42.51  | 155.51  | 7.50E-03 | 0.2  |
| ENSG00000183048 | <b>SLC25A10</b> | 61.47  | 7.87   | 0.13    | 3.27E-06 | 0.3  | 49.35  | 12.15  | 0.25    | 0.00E+00 | 1.1  |
| ENSG00000004864 | <b>SLC25A13</b> | 59.11  | 73.06  | 1.24    | 1.00E-04 | 0.8  | 4.69   | 3.20   | 0.68    | 5.00E-04 | 1.2  |
| ENSG00000117620 | <b>SLC35A3</b>  | 7.69   | 14.56  | 1.89    | 2.40E-03 | 1.6  | 25.44  | 86.86  | 3.41    | 5.20E-03 | 3.4  |
| ENSG00000137700 | <b>SLC37A4</b>  | 55.53  | 16.26  | 0.29    | 1.17E-06 | 0.7  | 51.61  | 17.23  | 0.33    | 3.32E-06 | 0.7  |
| ENSG00000142168 | <b>SOD1</b>     | 416.76 | 112.95 | 0.27    | 4.32E-06 | 0.8  | 81.60  | 14.07  | 0.17    | 9.53E-06 | 0.6  |
| ENSG00000125398 | <b>SOX9</b>     | 1.89   | 145.55 | 77.17   | 3.76E-06 | 23.8 | 4.45   | 264.45 | 59.46   | 0.00E+00 | 5.2  |
| ENSG00000061656 | <b>SPAG4</b>    | 0.89   | 0.37   | 0.41    | 1.00E-04 | 0.6  | 21.81  | 7.26   | 0.33    | 1.00E-04 | 0.7  |
| ENSG00000128039 | <b>SRD5A3</b>   | 3.17   | 7.44   | 2.35    | 5.50E-03 | 0.7  | 28.50  | 134.36 | 4.71    | 8.10E-03 | 1.2  |
| ENSG00000159167 | <b>STC1</b>     | 0.10   | 2.02   | 20.16   | 8.50E-03 | 0.0  | 0.05   | 1.85   | 40.88   | NS       | 0.1  |
| ENSG00000113739 | <b>STC2</b>     | 0.07   | 217.72 | 3214.39 | 4.68E-09 | 9.5  | 0.05   | 198.62 | 3647.04 | 1.16E-08 | 7.4  |
| ENSG00000117632 | <b>STMN1</b>    | 2.46   | 181.58 | 73.68   | 1.32E-06 | 1.1  | 2.53   | 202.66 | 80.04   | 2.33E-06 | 1.0  |

|                 |        |        |        |        |          |      |       |        |        |          |      |
|-----------------|--------|--------|--------|--------|----------|------|-------|--------|--------|----------|------|
| ENSG00000177156 | TALDO1 | 39.47  | 145.33 | 3.68   | NS       | 0.8  | 9.91  | 47.46  | 4.79   | NS       | 1.6  |
| ENSG00000160180 | TFF3   | 2.38   | 0.04   | 0.02   | 3.00E-04 | 0.1  | 0.39  | 0.04   | 0.09   | 2.00E-04 | 0.1  |
| ENSG00000163235 | TGFA   | 1.24   | 4.09   | 3.29   | NS       | 1.5  | 42.14 | 178.58 | 4.24   | NS       | 1.1  |
| ENSG00000120708 | TGFBI  | 18.48  | 611.96 | 33.11  | 0.00E+00 | 59.1 | 4.76  | 42.46  | 8.91   | NS       | 0.8  |
| ENSG00000007350 | TKTL1  | 0.03   | 0.00   | 0.00   | NS       | 0.0  | 0.01  | 0.11   | 19.14  | NS       | 0.6  |
| ENSG00000146242 | TPBG   | 0.34   | 54.12  | 159.40 | 2.84E-07 | 2.6  | 0.19  | 22.98  | 119.42 | 0.00E+00 | 74.3 |
| ENSG00000111669 | TPH1   | 102.36 | 308.82 | 3.02   | NS       | 0.6  | 18.15 | 69.14  | 3.81   | NS       | 1.2  |
| ENSG00000169902 | TPST1  | 7.14   | 17.53  | 2.46   | 5.40E-03 | 1.4  | 39.31 | 154.63 | 3.93   | NS       | 2.6  |
| ENSG00000104522 | TSTA3  | 9.76   | 21.64  | 2.22   | NS       | 0.9  | 5.92  | 13.03  | 2.20   | NS       | 1.8  |
| ENSG00000136810 | TXN    | 129.33 | 561.16 | 4.34   | NS       | 1.7  | 45.51 | 216.30 | 4.75   | NS       | 1.7  |
| ENSG00000169764 | UGP2   | 114.56 | 74.60  | 0.65   | 0.00E+00 | 0.3  | 3.55  | 6.32   | 1.78   | 1.00E-04 | 0.6  |
| ENSG00000038427 | VCAN   | 0.29   | 9.71   | 33.72  | 2.30E-03 | 0.1  | 0.46  | 179.38 | 388.85 | 0.00E+00 | 1.5  |
| ENSG00000112715 | VEGFA  | 40.78  | 45.00  | 1.10   | 9.00E-04 | 6.2  | 89.44 | 90.66  | 1.01   | 1.20E-03 | 0.4  |
| ENSG00000147852 | VLDLR  | 0.34   | 46.55  | 136.97 | 9.36E-07 | 2.1  | 0.25  | 25.42  | 102.62 | 2.89E-06 | 1.2  |
| ENSG00000015532 | XYLT2  | 4.44   | 16.07  | 3.62   | NS       | 1.1  | 14.16 | 43.33  | 3.06   | NS       | 1.1  |
| ENSG00000188994 | ZNF292 | 1.42   | 39.45  | 27.87  | 2.90E-03 | 2.5  | 0.82  | 57.70  | 70.52  | 2.40E-03 | 3.0  |

### Hallmark Heme Metabolism

|                 |          |        |        |       |          |      |        |        |        |          |      |
|-----------------|----------|--------|--------|-------|----------|------|--------|--------|--------|----------|------|
| ENSG00000115657 | ABCB6    | 9.48   | 17.33  | 1.83  | 1.10E-03 | 1.0  | 13.53  | 41.65  | 3.08   | NS       | 3.2  |
| ENSG00000118777 | ABCG2    | 12.05  | 53.14  | 4.41  | NS       | 14.1 | 15.74  | 85.56  | 5.44   | NS       | 21.5 |
| ENSG00000102575 | ACP5     | 9.39   | 1.38   | 0.15  | 0.00E+00 | 0.3  | 4.95   | 0.59   | 0.12   | 7.92E-06 | 0.1  |
| ENSG00000164398 | ACSL6    | 0.93   | 0.03   | 0.03  | 1.96E-06 | 0.1  | 0.53   | 0.39   | 0.74   | 2.30E-03 | 0.6  |
| ENSG00000087274 | ADD1     | 11.27  | 61.89  | 5.49  | NS       | 2.0  | 9.50   | 67.87  | 7.14   | NS       | 2.1  |
| ENSG00000075340 | ADD2     | 0.04   | 0.66   | 18.08 | 3.00E-04 | 0.0  | 0.02   | 4.90   | 212.45 | 1.70E-03 | 0.1  |
| ENSG00000159346 | ADIPOR1  | 30.42  | 136.13 | 4.48  | NS       | 2.0  | 27.86  | 139.74 | 5.02   | NS       | 2.1  |
| ENSG00000026652 | AGPAT4   | 0.23   | 7.93   | 33.90 | 3.00E-04 | 0.5  | 0.13   | 11.27  | 86.17  | 1.00E-04 | 0.7  |
| ENSG00000169877 | AHSP     | 0.22   | 0.00   | 0.00  | 4.70E-03 | 0.0  | 0.11   | 0.00   | 0.00   | 5.10E-03 | 0.0  |
| ENSG00000148218 | ALAD     | 101.27 | 15.88  | 0.16  | 2.23E-07 | 1.7  | 114.46 | 24.47  | 0.21   | 7.73E-07 | 2.6  |
| ENSG00000144908 | ALDH1L1  | 93.84  | 0.09   | 0.00  | 6.07E-08 | 0.3  | 92.35  | 2.02   | 0.02   | 1.97E-06 | 4.7  |
| ENSG00000119711 | ALDH6A1  | 70.02  | 11.16  | 0.16  | 0.00E+00 | 0.8  | 84.75  | 30.54  | 0.36   | 1.00E-04 | 1.6  |
| ENSG00000029534 | ANK1     | 0.03   | 0.51   | 17.27 | 1.70E-03 | 0.1  | 0.02   | 4.25   | 275.27 | 1.90E-03 | 1.2  |
| ENSG00000165272 | AQP3     | 32.40  | 2.20   | 0.07  | 1.82E-07 | 0.9  | 33.32  | 32.82  | 0.98   | 2.20E-03 | 9.3  |
| ENSG00000196914 | ARHGEF12 | 8.48   | 28.81  | 3.40  | NS       | 2.9  | 7.81   | 26.56  | 3.40   | NS       | 2.5  |
| ENSG00000102931 | ARL2BP   | 14.38  | 115.08 | 8.00  | NS       | 3.8  | 13.77  | 122.44 | 8.89   | NS       | 4.6  |

|                 |          |         |        |        |          |      |         |        |        |          |         |
|-----------------|----------|---------|--------|--------|----------|------|---------|--------|--------|----------|---------|
| ENSG00000070669 | ASNS     | 1.84    | 315.62 | 171.91 | 8.05E-06 | 4.6  | 1.98    | 371.26 | 187.46 | 8.70E-06 | 4.5     |
| ENSG00000101844 | ATG4A    | 7.19    | 13.90  | 1.93   | 8.00E-04 | 3.1  | 6.51    | 16.75  | 2.57   | 4.20E-03 | 4.5     |
| ENSG00000033627 | ATP6V0A1 | 7.17    | 25.23  | 3.52   | NS       | 1.9  | 6.71    | 34.21  | 5.10   | NS       | 2.4     |
| ENSG00000156273 | BACH1    | 2.68    | 39.98  | 14.90  | NS       | 2.5  | 3.03    | 43.91  | 14.48  | NS       | 2.3     |
| ENSG00000187244 | BCAM     | 9.49    | 33.39  | 3.52   | NS       | 0.7  | 6.71    | 70.46  | 10.49  | NS       | 1.8     |
| ENSG00000106605 | BLVRA    | 2.48    | 21.85  | 8.81   | NS       | 0.6  | 0.87    | 18.69  | 21.47  | NS       | 0.6     |
| ENSG00000090013 | BLVRB    | 66.94   | 74.93  | 1.12   | 4.00E-04 | 2.9  | 106.09  | 87.90  | 0.83   | 7.00E-04 | 3.0     |
| ENSG00000138756 | BMP2K    | 3.31    | 19.97  | 6.03   | NS       | 2.1  | 2.82    | 24.84  | 8.82   | NS       | 2.5     |
| ENSG00000104765 | BNIP3L   | 8.24    | 70.31  | 8.54   | NS       | 1.9  | 7.63    | 70.98  | 9.30   | NS       | 1.9     |
| ENSG00000172331 | BPGM     | 3.07    | 14.99  | 4.89   | NS       | 0.8  | 3.39    | 21.69  | 6.39   | NS       | 1.0     |
| ENSG00000172270 | BSG      | 31.25   | 217.92 | 6.97   | NS       | 0.6  | 26.52   | 257.95 | 9.73   | 9.90E-03 | 0.7     |
| ENSG00000159388 | BTG2     | 3.89    | 100.21 | 25.78  | 3.00E-03 | 22.6 | 1.07    | 214.14 | 199.33 | 1.00E-03 | 37.7    |
| ENSG00000166167 | BTRC     | 4.20    | 22.71  | 5.41   | NS       | 1.3  | 4.06    | 25.29  | 6.24   | NS       | 1.3     |
| ENSG00000125730 | C3       | 1773.54 | 14.49  | 0.01   | 1.54E-07 | 5.7  | 1456.62 | 7.61   | 0.01   | 0.00E+00 | 3.3     |
| ENSG00000104267 | CA2      | 61.14   | 8.06   | 0.13   | 2.07E-06 | 0.7  | 69.17   | 28.19  | 0.41   | 1.00E-04 | 3.4     |
| ENSG00000153113 | CAST     | 10.61   | 74.21  | 7.00   | NS       | 6.8  | 9.32    | 60.19  | 6.46   | NS       | 5.1     |
| ENSG00000121691 | CAT      | 341.00  | 10.86  | 0.03   | 1.54E-07 | 0.9  | 400.58  | 21.17  | 0.05   | 5.49E-07 | 1.5     |
| ENSG00000024862 | CCDC28A  | 35.34   | 34.49  | 0.98   | 1.00E-03 | 2.2  | 23.52   | 26.61  | 1.13   | 1.00E-03 | 1.7     |
| ENSG00000112576 | CCND3    | 2.45    | 33.83  | 13.81  | 6.00E-04 | 3.3  | 1.59    | 32.98  | 20.76  | 4.40E-03 | 3.6     |
| ENSG00000004897 | CDC27    | 4.70    | 34.16  | 7.26   | NS       | 1.1  | 5.05    | 53.99  | 10.69  | NS       | 1.6     |
| ENSG00000140743 | CDR2     | 3.94    | 18.72  | 4.75   | NS       | 0.6  | 4.47    | 21.49  | 4.80   | NS       | 0.7     |
| ENSG00000138433 | CIR1     | 8.27    | 35.89  | 4.34   | NS       | 2.2  | 8.53    | 31.08  | 3.64   | NS       | 1.8     |
| ENSG00000109572 | CLCN3    | 5.22    | 50.33  | 9.64   | NS       | 2.8  | 4.81    | 66.82  | 13.90  | NS       | 3.2     |
| ENSG00000155962 | CLIC2    | 2.34    | 0.55   | 0.23   | 1.00E-03 | 1.2  | 0.87    | 0.47   | 0.53   | 7.00E-04 | 0.9     |
| ENSG00000080819 | CPOX     | 16.64   | 43.41  | 2.61   | 3.30E-03 | 1.6  | 22.58   | 40.24  | 1.78   | 3.40E-03 | 1.4     |
| ENSG00000215908 | CROCCP2  | 37.43   | 20.23  | 0.54   | 3.70E-03 | 1.6  | 44.32   | 18.51  | 0.42   | 2.60E-03 | 1.1     |
| ENSG00000040531 | CTNS     | 7.18    | 34.65  | 4.83   | NS       | 2.1  | 7.08    | 42.14  | 5.95   | NS       | 2.6     |
| ENSG00000164733 | CTSB     | 153.65  | 419.75 | 2.73   | NS       | 30.7 | 100.71  | 281.13 | 2.79   | 6.70E-03 | 23.8    |
| ENSG00000196188 | CTSE     | 0.01    | 0.41   | 44.50  | NS       | 31.3 | 0.07    | 13.75  | 195.65 | 1.00E-04 | #DIV/0! |
| ENSG00000100592 | DAAMI    | 2.85    | 10.15  | 3.56   | NS       | 0.9  | 2.92    | 22.09  | 7.56   | NS       | 1.7     |
| ENSG00000122741 | DCAF10   | 4.16    | 30.18  | 7.25   | NS       | 4.3  | 4.47    | 26.96  | 6.03   | NS       | 3.8     |
| ENSG00000100897 | DCAF11   | 66.78   | 32.32  | 0.48   | 4.67E-06 | 1.0  | 64.18   | 37.69  | 0.59   | 0.00E+00 | 0.9     |
| ENSG00000043093 | DCUN1D1  | 6.50    | 19.81  | 3.05   | NS       | 1.1  | 6.16    | 19.39  | 3.15   | NS       | 1.0     |

|                 |                |        |        |       |          |         |        |        |        |          |         |
|-----------------|----------------|--------|--------|-------|----------|---------|--------|--------|--------|----------|---------|
| ENSG0000007968  | <b>EZF2</b>    | 0.09   | 3.61   | 38.47 | 2.50E-03 | 0.8     | 0.02   | 4.24   | 221.94 | 2.00E-03 | 0.8     |
| ENSG00000086232 | <b>EIF2AK1</b> | 25.81  | 62.97  | 2.44  | 2.00E-03 | 1.0     | 25.12  | 83.79  | 3.34   | NS       | 1.1     |
| ENSG00000118985 | <b>ELL2</b>    | 23.01  | 54.46  | 2.37  | 1.40E-03 | 5.0     | 27.17  | 53.12  | 1.96   | 1.60E-03 | 4.5     |
| ENSG00000149218 | <b>ENDOD1</b>  | 2.03   | 53.61  | 26.46 | 4.00E-04 | 16.4    | 1.44   | 32.94  | 22.84  | NS       | 11.0    |
| ENSG00000159023 | <b>EPB41</b>   | 10.94  | 25.67  | 2.35  | 1.60E-03 | 0.4     | 11.02  | 33.57  | 3.05   | NS       | 0.6     |
| ENSG00000187266 | <b>EPOR</b>    | 11.16  | 9.49   | 0.85  | NS       | 1.0     | 9.23   | 9.02   | 0.98   | NS       | 0.9     |
| ENSG00000164010 | <b>ERMAP</b>   | 12.59  | 10.46  | 0.83  | 3.00E-04 | 3.7     | 8.55   | 8.95   | 1.05   | 4.00E-04 | 3.2     |
| ENSG00000108799 | <b>EZH1</b>    | 7.14   | 21.25  | 2.98  | NS       | 1.9     | 7.70   | 20.23  | 2.63   | NS       | 1.7     |
| ENSG00000183508 | <b>FAM46C</b>  | 2.51   | 1.61   | 0.64  | 1.00E-03 | 2.3     | 1.20   | 2.71   | 2.26   | 4.10E-03 | 3.4     |
| ENSG00000178974 | <b>FBXO34</b>  | 2.70   | 22.66  | 8.39  | NS       | 1.7     | 2.50   | 32.08  | 12.81  | NS       | 2.1     |
| ENSG00000100225 | <b>FBXO7</b>   | 23.38  | 63.72  | 2.73  | NS       | 2.7     | 20.11  | 56.25  | 2.80   | NS       | 2.3     |
| ENSG00000112146 | <b>FBXO9</b>   | 11.73  | 14.16  | 1.21  | 1.00E-04 | 1.1     | 10.53  | 14.90  | 1.41   | 3.00E-04 | 1.2     |
| ENSG00000066926 | <b>FECH</b>    | 8.78   | 44.39  | 5.05  | NS       | 2.7     | 9.23   | 75.57  | 8.19   | NS       | 3.0     |
| ENSG00000167363 | <b>FN3K</b>    | 27.31  | 4.88   | 0.18  | 0.00E+00 | 1.2     | 21.41  | 10.93  | 0.51   | 4.00E-04 | 2.7     |
| ENSG00000065970 | <b>FOXJ2</b>   | 3.56   | 30.50  | 8.58  | 6.70E-03 | 3.8     | 3.58   | 35.63  | 9.94   | 8.90E-03 | 4.1     |
| ENSG00000118689 | <b>FOXO3</b>   | 4.80   | 56.46  | 11.77 | NS       | 4.3     | 4.22   | 39.09  | 9.27   | NS       | 3.0     |
| ENSG00000160282 | <b>FTCD</b>    | 418.94 | 0.39   | 0.00  | 1.74E-07 | 0.6     | 677.61 | 1.75   | 0.00   | 5.37E-07 | 2.0     |
| ENSG00000165219 | <b>GAPVD1</b>  | 2.39   | 19.66  | 8.23  | NS       | 1.5     | 2.57   | 24.86  | 9.68   | NS       | 2.1     |
| ENSG00000001084 | <b>GCLC</b>    | 22.08  | 18.19  | 0.82  | 0.00E+00 | 0.8     | 26.65  | 42.87  | 1.61   | 1.40E-03 | 1.8     |
| ENSG00000023909 | <b>GCLM</b>    | 8.19   | 82.35  | 10.05 | NS       | 7.4     | 7.58   | 97.64  | 12.89  | NS       | 7.4     |
| ENSG00000006007 | <b>GDE1</b>    | 10.34  | 56.48  | 5.46  | NS       | 1.5     | 10.43  | 70.02  | 6.71   | NS       | 1.8     |
| ENSG00000182512 | <b>GLRX5</b>   | 22.89  | 55.83  | 2.44  | 2.40E-03 | 1.0     | 30.04  | 95.45  | 3.18   | NS       | 1.4     |
| ENSG00000163655 | <b>GMPS</b>    | 2.71   | 36.63  | 13.53 | 1.90E-03 | 0.5     | 2.84   | 31.47  | 11.09  | NS       | 0.5     |
| ENSG00000136732 | <b>GYPC</b>    | 2.84   | 34.52  | 12.16 | 3.40E-03 | 2.5     | 1.70   | 29.93  | 17.56  | NS       | 1.9     |
| ENSG00000197465 | <b>GYPE</b>    | 0.18   | 0.00   | 0.00  | 7.60E-03 | 0.0     | 0.02   | 0.10   | 5.03   | NS       | 6.5     |
| ENSG00000189060 | <b>H1FO</b>    | 101.20 | 377.14 | 3.73  | NS       | 3.4     | 66.28  | 356.51 | 5.38   | NS       | 3.7     |
| ENSG00000063854 | <b>HAGH</b>    | 54.31  | 10.06  | 0.19  | 4.63E-06 | 2.0     | 61.62  | 15.53  | 0.25   | 0.00E+00 | 3.2     |
| ENSG00000244734 | <b>HBB</b>     | 173.68 | 0.00   | 0.00  | 2.39E-06 | #DIV/0! | 32.39  | 0.08   | 0.00   | 7.11E-06 | #DIV/0! |
| ENSG00000223609 | <b>HBD</b>     | 0.41   | 0.00   | 0.00  | 2.00E-04 | #DIV/0! | 0.14   | 0.00   | 0.00   | 3.00E-04 | #DIV/0! |
| ENSG00000086506 | <b>HBQ1</b>    | 0.05   | 0.07   | 1.49  | NS       | 0.0     | 0.04   | 0.48   | 12.43  | NS       | 0.4     |
| ENSG00000143321 | <b>HDGF</b>    | 82.77  | 229.33 | 2.77  | 4.90E-03 | 0.8     | 105.13 | 224.21 | 2.13   | 6.30E-03 | 0.7     |
| ENSG00000013583 | <b>HEBP1</b>   | 24.35  | 45.07  | 1.85  | 3.00E-04 | 2.2     | 29.55  | 44.80  | 1.52   | 6.00E-04 | 2.0     |
| ENSG00000256269 | <b>HMBS</b>    | 3.93   | 10.58  | 2.69  | NS       | 0.3     | 6.41   | 14.94  | 2.33   | NS       | 0.4     |

|                 |                |        |        |        |          |     |        |        |         |          |       |
|-----------------|----------------|--------|--------|--------|----------|-----|--------|--------|---------|----------|-------|
| ENSG00000109854 | <b>HTATIP2</b> | 15.44  | 43.78  | 2.83   | 5.40E-03 | 2.2 | 15.33  | 61.13  | 3.99    | NS       | 3.0   |
| ENSG00000115317 | <b>HTRA2</b>   | 9.14   | 28.75  | 3.15   | NS       | 2.2 | 8.94   | 28.86  | 3.23    | NS       | 2.0   |
| ENSG00000105371 | <b>ICAM4</b>   | 0.15   | 0.10   | 0.66   | NS       | 0.2 | 0.04   | 0.34   | 7.76    | NS       | 0.4   |
| ENSG00000143061 | <b>IGSF3</b>   | 0.21   | 132.88 | 639.27 | 2.44E-07 | 4.5 | 0.23   | 90.81  | 402.73  | 2.42E-06 | 2.4   |
| ENSG00000135070 | <b>ISCA1</b>   | 8.55   | 43.91  | 5.14   | NS       | 1.3 | 9.63   | 53.26  | 5.53    | NS       | 1.1   |
| ENSG00000114166 | <b>KAT2B</b>   | 11.20  | 4.25   | 0.38   | 0.00E+00 | 5.3 | 10.20  | 8.51   | 0.83    | 2.00E-04 | 10.0  |
| ENSG00000197993 | <b>KEL</b>     | 0.03   | 0.25   | 7.95   | NS       | 0.4 | 0.05   | 4.70   | 98.29   | 1.00E-04 | 3.4   |
| ENSG00000100441 | <b>KHNYN</b>   | 12.06  | 95.74  | 7.94   | NS       | 5.9 | 11.91  | 90.00  | 7.56    | NS       | 4.0   |
| ENSG00000105610 | <b>KLF1</b>    | 0.14   | 0.10   | 0.72   | NS       | 0.1 | 0.04   | 0.17   | 4.21    | NS       | 0.3   |
| ENSG00000109787 | <b>KLF3</b>    | 12.92  | 93.17  | 7.21   | NS       | 8.5 | 12.29  | 63.21  | 5.14    | NS       | 4.6   |
| ENSG00000005893 | <b>LAMP2</b>   | 43.74  | 113.26 | 2.59   | NS       | 4.8 | 36.59  | 137.60 | 3.76    | NS       | 6.1   |
| ENSG00000135363 | <b>LMO2</b>    | 4.53   | 0.20   | 0.04   | 0.00E+00 | 0.1 | 1.87   | 3.90   | 2.09    | 6.10E-03 | 3.3   |
| ENSG00000101577 | <b>LPIN2</b>   | 28.14  | 28.91  | 1.03   | 1.00E-04 | 2.2 | 34.43  | 47.49  | 1.38    | 1.40E-03 | 3.4   |
| ENSG00000197324 | <b>LRP10</b>   | 8.95   | 86.30  | 9.64   | 8.40E-03 | 8.1 | 6.15   | 82.51  | 13.42   | NS       | 6.9   |
| ENSG00000034152 | <b>MAP2K3</b>  | 21.65  | 19.91  | 0.92   | 1.00E-04 | 0.8 | 20.87  | 19.97  | 0.96    | 1.00E-04 | 0.8   |
| ENSG00000117791 | <b>MARC2</b>   | 121.94 | 11.47  | 0.09   | 3.37E-07 | 1.5 | 135.21 | 8.72   | 0.06    | 2.48E-06 | 1.0   |
| ENSG00000165406 | <b>MARC8</b>   | 4.35   | 8.58   | 1.97   | 2.00E-03 | 1.4 | 3.80   | 9.40   | 2.48    | 3.40E-03 | 1.6   |
| ENSG00000075413 | <b>MARK3</b>   | 6.23   | 36.28  | 5.82   | NS       | 1.4 | 6.01   | 39.12  | 6.51    | NS       | 1.2   |
| ENSG00000143797 | <b>MBOAT2</b>  | 0.28   | 71.87  | 253.89 | 3.02E-06 | 8.4 | 0.32   | 32.31  | 100.20  | 3.00E-04 | 3.3   |
| ENSG00000147324 | <b>MFHAS1</b>  | 2.62   | 62.22  | 23.77  | 2.60E-03 | 1.4 | 1.88   | 48.76  | 25.87   | 9.80E-03 | 1.2   |
| ENSG00000143198 | <b>MGST3</b>   | 7.32   | 29.56  | 4.04   | NS       | 2.8 | 9.02   | 25.79  | 2.86    | NS       | 1.9   |
| ENSG00000107789 | <b>MINPP1</b>  | 8.35   | 25.92  | 3.11   | 7.60E-03 | 0.8 | 12.42  | 32.67  | 2.63    | NS       | 1.0   |
| ENSG00000133606 | <b>MKRN1</b>   | 11.88  | 60.77  | 5.12   | NS       | 1.1 | 11.77  | 58.75  | 4.99    | NS       | 1.2   |
| ENSG00000075643 | <b>MOCOS</b>   | 9.26   | 5.91   | 0.64   | 0.00E+00 | 0.6 | 10.25  | 4.23   | 0.41    | 0.00E+00 | 0.5   |
| ENSG00000101928 | <b>MOSPD1</b>  | 1.74   | 75.14  | 43.10  | 1.00E-04 | 4.3 | 1.79   | 82.86  | 46.20   | 1.00E-04 | 5.3   |
| ENSG00000130830 | <b>MPP1</b>    | 8.90   | 5.02   | 0.56   | 0.00E+00 | 0.6 | 6.80   | 11.69  | 1.72    | 5.00E-04 | 1.3   |
| ENSG00000119950 | <b>MXI1</b>    | 10.51  | 15.03  | 1.43   | 4.00E-04 | 2.7 | 11.50  | 28.10  | 2.44    | NS       | 5.4   |
| ENSG00000198336 | <b>MYL4</b>    | 0.19   | 0.48   | 2.47   | NS       | 1.1 | 0.14   | 196.95 | 1404.31 | 1.60E-03 | 302.0 |
| ENSG00000141562 | <b>NARF</b>    | 4.90   | 9.77   | 1.99   | NS       | 0.6 | 4.78   | 12.67  | 2.65    | NS       | 0.8   |
| ENSG00000266412 | <b>NCOA4</b>   | 83.67  | 186.59 | 2.23   | NS       | 2.4 | 73.05  | 180.91 | 2.48    | 7.90E-03 | 2.1   |
| ENSG00000151414 | <b>NEK7</b>    | 6.81   | 42.91  | 6.30   | NS       | 4.9 | 6.34   | 37.57  | 5.92    | NS       | 4.7   |
| ENSG00000123405 | <b>NFE2</b>    | 0.21   | 0.42   | 2.02   | NS       | 0.2 | 0.09   | 0.58   | 6.28    | NS       | 0.2   |
| ENSG00000082641 | <b>NFE2L1</b>  | 61.28  | 217.11 | 3.54   | NS       | 1.5 | 46.76  | 231.17 | 4.94    | NS       | 1.6   |

|                 |                 |        |        |       |          |      |        |        |       |          |      |
|-----------------|-----------------|--------|--------|-------|----------|------|--------|--------|-------|----------|------|
| ENSG00000112992 | <b>NNT</b>      | 34.74  | 41.59  | 1.20  | 1.60E-03 | 3.2  | 22.20  | 36.50  | 1.64  | 1.20E-03 | 2.7  |
| ENSG00000113580 | <b>NR3C1</b>    | 9.04   | 24.56  | 2.72  | NS       | 6.7  | 9.21   | 32.14  | 3.49  | NS       | 5.7  |
| ENSG00000173598 | <b>NUDT4</b>    | 3.60   | 12.81  | 3.56  | NS       | 1.1  | 4.93   | 31.59  | 6.41  | NS       | 2.6  |
| ENSG00000123240 | <b>OPTN</b>     | 26.13  | 125.47 | 4.80  | NS       | 13.5 | 18.74  | 97.75  | 5.22  | NS       | 10.0 |
| ENSG00000184792 | <b>OSBP2</b>    | 0.18   | 0.73   | 3.99  | NS       | 0.2  | 0.18   | 1.56   | 8.49  | NS       | 0.5  |
| ENSG00000072682 | <b>P4HA2</b>    | 1.41   | 20.48  | 14.55 | 1.00E-04 | 9.1  | 1.29   | 25.34  | 19.68 | 3.00E-04 | 14.8 |
| ENSG00000173599 | <b>PC</b>       | 39.27  | 3.08   | 0.08  | 6.02E-07 | 0.4  | 36.26  | 9.69   | 0.27  | 8.61E-06 | 1.1  |
| ENSG00000162366 | <b>PDZK1IP1</b> | 0.29   | 0.00   | 0.00  | 2.76E-06 | 0.0  | 0.52   | 0.06   | 0.12  | 0.00E+00 | 0.7  |
| ENSG00000130313 | <b>PGLS</b>     | 12.97  | 69.90  | 5.39  | NS       | 2.9  | 13.16  | 57.68  | 4.38  | NS       | 2.0  |
| ENSG00000073921 | <b>PICALM</b>   | 23.21  | 196.98 | 8.49  | NS       | 4.4  | 21.89  | 144.06 | 6.58  | NS       | 3.5  |
| ENSG00000007541 | <b>PIGQ</b>     | 7.93   | 18.21  | 2.30  | NS       | 1.5  | 8.85   | 16.82  | 1.90  | NS       | 1.4  |
| ENSG00000143224 | <b>PPOX</b>     | 5.46   | 7.85   | 1.44  | NS       | 0.8  | 5.06   | 7.56   | 1.49  | NS       | 0.8  |
| ENSG00000068971 | <b>PPP2R5B</b>  | 4.14   | 11.64  | 2.81  | NS       | 2.7  | 3.75   | 13.94  | 3.72  | NS       | 3.5  |
| ENSG00000122490 | <b>PQLC1</b>    | 47.76  | 17.94  | 0.38  | 1.00E-04 | 3.2  | 53.76  | 16.16  | 0.30  | 1.00E-04 | 3.6  |
| ENSG00000167815 | <b>PRDX2</b>    | 74.84  | 118.20 | 1.58  | 3.00E-04 | 0.4  | 83.89  | 175.46 | 2.09  | 5.80E-03 | 0.7  |
| ENSG00000110801 | <b>PSMD9</b>    | 3.87   | 16.60  | 4.29  | NS       | 2.7  | 4.16   | 18.61  | 4.47  | NS       | 2.9  |
| ENSG00000179262 | <b>RAD23A</b>   | 37.61  | 127.74 | 3.40  | NS       | 2.4  | 50.40  | 154.52 | 3.07  | NS       | 3.4  |
| ENSG00000141084 | <b>RANBP10</b>  | 23.99  | 22.49  | 0.94  | 6.00E-04 | 1.7  | 21.82  | 23.36  | 1.07  | 8.00E-04 | 1.7  |
| ENSG00000076864 | <b>RAP1GAP</b>  | 4.96   | 1.55   | 0.31  | 0.00E+00 | 0.3  | 4.55   | 8.84   | 1.94  | NS       | 1.4  |
| ENSG00000132819 | <b>RBM38</b>    | 3.75   | 54.28  | 14.46 | 2.00E-04 | 0.9  | 2.74   | 42.67  | 15.56 | 1.70E-03 | 0.8  |
| ENSG00000003756 | <b>RBM5</b>     | 18.02  | 74.22  | 4.12  | NS       | 3.5  | 20.01  | 75.54  | 3.77  | NS       | 2.7  |
| ENSG00000120158 | <b>RCL1</b>     | 16.40  | 12.87  | 0.78  | 0.00E+00 | 0.7  | 27.04  | 13.70  | 0.51  | 1.00E-04 | 0.7  |
| ENSG00000188672 | <b>RHCE</b>     | 0.90   | 0.43   | 0.48  | 2.50E-03 | 2.4  | 0.40   | 0.19   | 0.48  | 3.00E-04 | 2.4  |
| ENSG00000101782 | <b>RIOK3</b>    | 19.84  | 111.08 | 5.60  | NS       | 8.0  | 18.32  | 94.95  | 5.18  | NS       | 6.7  |
| ENSG00000164068 | <b>RNF123</b>   | 19.80  | 14.72  | 0.74  | 1.00E-04 | 1.1  | 21.12  | 15.44  | 0.73  | 1.00E-04 | 1.0  |
| ENSG00000034677 | <b>RNF19A</b>   | 8.73   | 47.38  | 5.43  | NS       | 6.1  | 6.88   | 43.45  | 6.32  | NS       | 7.4  |
| ENSG00000137575 | <b>SDCBP</b>    | 16.67  | 340.17 | 20.40 | 1.90E-03 | 5.2  | 14.39  | 251.11 | 17.45 | NS       | 3.7  |
| ENSG00000129657 | <b>SEC14L1</b>  | 3.52   | 55.22  | 15.70 | NS       | 2.7  | 1.81   | 48.28  | 26.75 | NS       | 2.4  |
| ENSG00000143416 | <b>SELENBP1</b> | 221.61 | 0.98   | 0.00  | 5.69E-07 | 0.1  | 271.49 | 4.58   | 0.02  | 1.87E-06 | 0.3  |
| ENSG00000149577 | <b>SIDT2</b>    | 8.01   | 9.08   | 1.13  | 0.00E+00 | 1.5  | 7.88   | 11.44  | 1.45  | 2.00E-04 | 1.9  |
| ENSG00000126903 | <b>SLC10A3</b>  | 3.98   | 73.93  | 18.59 | 1.00E-04 | 6.7  | 2.71   | 50.83  | 18.75 | 3.70E-03 | 5.2  |
| ENSG00000110911 | <b>SLC11A2</b>  | 6.15   | 17.89  | 2.91  | 6.50E-03 | 0.9  | 8.21   | 28.90  | 3.52  | NS       | 1.2  |
| ENSG00000197208 | <b>SLC22A4</b>  | 0.21   | 11.06  | 52.93 | 4.06E-06 | 32.8 | 0.23   | 1.91   | 8.19  | NS       | 4.7  |



|                 |                 |       |        |         |          |     |       |        |         |          |     |
|-----------------|-----------------|-------|--------|---------|----------|-----|-------|--------|---------|----------|-----|
| ENSG00000147454 | <b>SLC25A37</b> | 15.25 | 43.10  | 2.83    | NS       | 2.6 | 20.64 | 27.11  | 1.31    | NS       | 1.5 |
| ENSG00000144659 | <b>SLC25A38</b> | 33.50 | 52.33  | 1.56    | 7.00E-04 | 1.0 | 36.56 | 85.22  | 2.33    | NS       | 1.6 |
| ENSG00000117394 | <b>SLC2A1</b>   | 0.55  | 199.17 | 365.17  | 0.00E+00 | 1.1 | 0.19  | 192.83 | 997.52  | 1.00E-04 | 0.9 |
| ENSG00000170385 | <b>SLC30A1</b>  | 24.53 | 68.89  | 2.81    | NS       | 5.2 | 18.27 | 86.06  | 4.71    | NS       | 6.7 |
| ENSG00000196660 | <b>SLC30A10</b> | 8.51  | 0.12   | 0.01    | 5.01E-06 | 0.5 | 10.73 | 0.92   | 0.09    | 0.00E+00 | 7.6 |
| ENSG00000130821 | <b>SLC6A8</b>   | 0.20  | 9.27   | 45.40   | 1.00E-04 | 0.2 | 0.12  | 21.51  | 182.91  | 0.00E+00 | 0.4 |
| ENSG00000196517 | <b>SLC6A9</b>   | 0.10  | 60.74  | 611.17  | 0.00E+00 | 5.3 | 0.19  | 38.33  | 201.73  | 1.00E-04 | 3.5 |
| ENSG00000151012 | <b>SLC7A11</b>  | 0.02  | 74.85  | 4224.00 | 3.87E-08 | 3.3 | 0.03  | 164.71 | 5440.14 | 1.81E-07 | 6.8 |
| ENSG00000088826 | <b>SMOX</b>     | 0.98  | 61.28  | 62.66   | 6.63E-06 | 7.0 | 0.98  | 74.16  | 75.90   | 0.00E+00 | 8.6 |
| ENSG00000145335 | <b>SNCA</b>     | 0.08  | 1.03   | 13.08   | NS       | 0.1 | 0.02  | 5.44   | 349.01  | NS       | 0.7 |
| ENSG00000070182 | <b>SPTB</b>     | 0.08  | 0.11   | 1.42    | NS       | 0.1 | 0.04  | 1.36   | 36.95   | NS       | 1.8 |
| ENSG00000159082 | <b>SYNJ1</b>    | 2.36  | 9.17   | 3.89    | NS       | 6.6 | 2.13  | 11.13  | 5.22    | NS       | 5.8 |
| ENSG00000162367 | <b>TAL1</b>     | 0.86  | 0.01   | 0.01    | 1.09E-06 | 0.2 | 0.48  | 0.03   | 0.06    | 2.64E-06 | 0.6 |
| ENSG00000187735 | <b>TCEA1</b>    | 12.82 | 155.94 | 12.17   | NS       | 1.4 | 13.69 | 174.03 | 12.71   | NS       | 1.7 |
| ENSG00000114126 | <b>TFDP2</b>    | 2.15  | 10.04  | 4.66    | NS       | 0.3 | 2.28  | 13.27  | 5.82    | NS       | 0.3 |
| ENSG00000072274 | <b>TFRC</b>     | 3.89  | 109.65 | 28.20   | 2.10E-03 | 1.4 | 7.52  | 144.40 | 19.21   | 1.50E-03 | 1.9 |
| ENSG00000133069 | <b>TMCC2</b>    | 0.18  | 3.92   | 21.34   | 5.60E-03 | 0.9 | 0.05  | 5.03   | 107.82  | 5.60E-03 | 1.2 |
| ENSG00000175348 | <b>TMEM9B</b>   | 8.03  | 38.83  | 4.83    | NS       | 3.7 | 5.80  | 49.55  | 8.54    | NS       | 4.7 |
| ENSG00000100354 | <b>TNRC6B</b>   | 1.84  | 9.27   | 5.05    | NS       | 0.8 | 2.38  | 9.91   | 4.17    | NS       | 0.9 |
| ENSG00000079308 | <b>TNS1</b>     | 20.02 | 7.71   | 0.39    | 5.08E-06 | 4.2 | 13.31 | 4.52   | 0.34    | 1.00E-04 | 1.8 |
| ENSG00000198900 | <b>TOPI</b>     | 12.87 | 91.97  | 7.14    | NS       | 0.7 | 12.87 | 103.94 | 8.08    | NS       | 0.7 |
| ENSG00000115993 | <b>TRAK2</b>    | 3.62  | 22.87  | 6.31    | NS       | 1.9 | 3.08  | 32.31  | 10.48   | NS       | 2.4 |
| ENSG00000204613 | <b>TRIM10</b>   | 1.40  | 0.00   | 0.00    | 2.75E-08 | 0.0 | 1.02  | 0.00   | 0.00    | 4.97E-08 | 0.0 |
| ENSG00000162722 | <b>TRIM58</b>   | 0.02  | 8.06   | 355.02  | 1.00E-03 | 5.2 | 0.01  | 5.74   | 888.02  | 3.30E-03 | 2.8 |
| ENSG00000168785 | <b>TSPAN5</b>   | 0.22  | 11.71  | 53.98   | 7.00E-04 | 1.2 | 0.37  | 15.73  | 42.14   | 5.00E-04 | 1.4 |
| ENSG00000130560 | <b>UBAC1</b>    | 9.39  | 34.61  | 3.69    | NS       | 0.7 | 10.36 | 41.68  | 4.02    | NS       | 0.9 |
| ENSG00000175567 | <b>UCP2</b>     | 4.74  | 4.24   | 0.90    | NS       | 0.2 | 1.28  | 17.62  | 13.74   | NS       | 0.4 |
| ENSG00000126088 | <b>UROD</b>     | 43.10 | 51.55  | 1.20    | 1.00E-03 | 0.9 | 50.86 | 66.83  | 1.31    | 3.30E-03 | 1.0 |
| ENSG00000188690 | <b>UROS</b>     | 6.50  | 11.67  | 1.79    | 1.60E-03 | 0.6 | 6.34  | 14.02  | 2.21    | 4.80E-03 | 0.8 |
| ENSG00000135655 | <b>USP15</b>    | 4.69  | 9.79   | 2.09    | 7.00E-04 | 1.6 | 5.24  | 11.03  | 2.10    | 1.90E-03 | 1.6 |
| ENSG00000136451 | <b>VEZF1</b>    | 6.06  | 73.19  | 12.08   | 1.20E-03 | 1.9 | 5.15  | 65.46  | 12.70   | 6.50E-03 | 1.5 |
| ENSG00000047597 | <b>XK</b>       | 0.44  | 0.38   | 0.86    | 6.00E-04 | 0.3 | 0.32  | 0.51   | 1.58    | 1.10E-03 | 0.4 |
| ENSG00000130227 | <b>XPO7</b>     | 5.72  | 50.47  | 8.83    | NS       | 0.7 | 6.11  | 65.79  | 10.76   | NS       | 0.9 |

|                             |       |          |        |        |          |         |          |        |        |          |       |
|-----------------------------|-------|----------|--------|--------|----------|---------|----------|--------|--------|----------|-------|
| ENSG00000119801             | YPEL5 | 21.88    | 179.98 | 8.23   | 4.70E-03 | 8.0     | 22.39    | 91.27  | 4.08   | NS       | 4.9   |
| <b>Hallmark Coagulation</b> |       |          |        |        |          |         |          |        |        |          |       |
| ENSG00000175899             | A2M   | 280.44   | 3.74   | 0.01   | 2.18E-07 | 5.7     | 275.03   | 15.46  | 0.06   | 1.26E-06 | 34.8  |
| ENSG00000168306             | ACOX2 | 116.27   | 0.29   | 0.00   | 1.50E-08 | 0.1     | 166.28   | 4.61   | 0.03   | 3.85E-06 | 1.6   |
| ENSG00000168615             | ADAM9 | 1.33     | 165.50 | 124.29 | 3.30E-03 | 14.0    | 1.26     | 208.89 | 165.63 | 2.80E-03 | 15.0  |
| ENSG00000214274             | ANG   | 548.51   | 2.55   | 0.00   | 7.74E-09 | 0.9     | 710.63   | 7.80   | 0.01   | 6.41E-08 | 3.0   |
| ENSG00000135046             | ANXA1 | 2.77     | 737.14 | 265.84 | 0.00E+00 | 82.9    | 1.23     | 412.95 | 335.69 | 3.00E-04 | 133.1 |
| ENSG00000118137             | APOA1 | 11000.82 | 13.80  | 0.00   | 1.39E-07 | 21.7    | 8593.47  | 899.42 | 0.10   | 1.00E-04 | 429.3 |
| ENSG00000130208             | APOC1 | 5444.72  | 12.09  | 0.00   | 5.89E-07 | 0.3     | 5644.64  | 204.01 | 0.04   | 0.00E+00 | 3.4   |
| ENSG00000234906             | APOC2 | 3348.84  | 0.52   | 0.00   | 6.04E-09 | 18.9    | 2704.47  | 2.86   | 0.00   | 5.31E-08 | 6.4   |
| ENSG00000110245             | APOC3 | 10956.82 | 0.79   | 0.00   | 1.36E-08 | 10.2    | 12127.76 | 9.24   | 0.00   | 3.69E-08 | 4.8   |
| ENSG00000168374             | ARF4  | 39.23    | 322.32 | 8.22   | NS       | 1.5     | 47.98    | 338.02 | 7.05   | NS       | 1.7   |
| ENSG00000168487             | BMP1  | 14.68    | 74.84  | 5.10   | NS       | 29.2    | 19.65    | 41.01  | 2.09   | NS       | 13.2  |
| ENSG00000173372             | CIQA  | 67.20    | 0.00   | 0.00   | 4.08E-06 | #DIV/0! | 22.25    | 0.03   | 0.00   | 5.95E-06 | 1.2   |
| ENSG00000159403             | C1R   | 793.04   | 0.48   | 0.00   | 6.51E-10 | 0.1     | 660.37   | 5.11   | 0.01   | 2.11E-06 | 1.0   |
| ENSG00000182326             | C1S   | 722.07   | 1.59   | 0.00   | 3.18E-09 | 0.5     | 647.15   | 13.04  | 0.02   | 6.05E-07 | 2.4   |
| ENSG00000166278             | C2    | 81.25    | 0.20   | 0.00   | 9.58E-09 | 2.1     | 68.43    | 0.26   | 0.00   | 1.25E-08 | 2.0   |
| ENSG00000125730             | C3    | 1773.54  | 14.49  | 0.01   | 1.54E-07 | 5.7     | 1456.62  | 7.61   | 0.01   | 0.00E+00 | 3.3   |
| ENSG00000157131             | C8A   | 278.31   | 0.11   | 0.00   | 1.08E-07 | #DIV/0! | 266.03   | 0.27   | 0.00   | 6.62E-08 | 3.8   |
| ENSG00000021852             | C8B   | 228.79   | 0.12   | 0.00   | 3.52E-07 | 9.6     | 227.71   | 0.57   | 0.00   | 4.82E-07 | 15.5  |
| ENSG00000176919             | C8G   | 304.86   | 0.26   | 0.00   | 3.51E-07 | 1.3     | 190.17   | 0.42   | 0.00   | 3.47E-08 | 3.2   |
| ENSG00000113600             | C9    | 432.26   | 0.04   | 0.00   | 8.24E-08 | 1.2     | 183.18   | 0.12   | 0.00   | 1.34E-07 | 0.6   |
| ENSG00000162909             | CAPN2 | 8.40     | 383.97 | 45.71  | 0.00E+00 | 25.4    | 3.61     | 265.81 | 73.71  | 1.00E-04 | 19.4  |
| ENSG00000149260             | CAPN5 | 22.69    | 10.48  | 0.46   | 3.40E-06 | 0.6     | 28.65    | 15.06  | 0.53   | 0.00E+00 | 0.8   |
| ENSG00000132906             | CASP9 | 4.95     | 7.96   | 1.61   | NS       | 0.9     | 2.95     | 9.86   | 3.34   | NS       | 0.9   |
| ENSG00000010278             | CD9   | 6.62     | 228.24 | 34.50  | 1.00E-04 | 2.3     | 5.29     | 97.34  | 18.39  | NS       | 0.9   |
| ENSG00000243649             | CFB   | 463.52   | 0.32   | 0.00   | 7.08E-08 | 9.3     | 359.88   | 1.70   | 0.00   | 3.80E-07 | 11.7  |
| ENSG00000197766             | CFD   | 1.14     | 0.12   | 0.11   | 1.00E-03 | 0.5     | 0.32     | 0.73   | 2.24   | NS       | 1.9   |
| ENSG00000000971             | CFH   | 354.48   | 0.00   | 0.00   | 1.96E-09 | 0.0     | 287.45   | 0.37   | 0.00   | 1.19E-07 | 6.5   |
| ENSG00000205403             | CFI   | 300.31   | 0.22   | 0.00   | 1.93E-08 | #DIV/0! | 224.35   | 6.86   | 0.03   | 1.95E-06 | 265.5 |
| ENSG00000120885             | CLU   | 859.16   | 23.62  | 0.03   | 1.77E-08 | 0.2     | 749.50   | 52.36  | 0.07   | 2.38E-07 | 0.7   |
| ENSG00000105664             | COMP  | 0.09     | 0.01   | 0.14   | NS       | 0.2     | 0.01     | 0.10   | 14.40  | NS       | 0.6   |
| ENSG00000080618             | CPB2  | 715.57   | 0.00   | 0.00   | 7.47E-10 | #DIV/0! | 545.00   | 0.20   | 0.00   | 2.77E-09 | 1.5   |

|                 |               |         |         |       |          |         |         |         |        |          |         |
|-----------------|---------------|---------|---------|-------|----------|---------|---------|---------|--------|----------|---------|
| ENSG00000120054 | <b>CPN1</b>   | 25.92   | 0.33    | 0.01  | 2.75E-08 | 2.1     | 23.18   | 10.47   | 0.45   | 3.00E-04 | 13.6    |
| ENSG00000182809 | <b>CRIP2</b>  | 5.60    | 0.26    | 0.05  | 9.86E-07 | 0.2     | 4.47    | 3.83    | 0.86   | 8.40E-03 | 2.9     |
| ENSG00000159176 | <b>CSRP1</b>  | 17.24   | 50.82   | 2.95  | NS       | 7.1     | 15.99   | 35.90   | 2.25   | NS       | 5.2     |
| ENSG00000164733 | <b>CTSB</b>   | 153.65  | 419.75  | 2.73  | NS       | 30.7    | 100.71  | 281.13  | 2.79   | 6.70E-03 | 23.8    |
| ENSG00000196188 | <b>CTSE</b>   | 0.01    | 0.41    | 44.50 | NS       | 31.3    | 0.07    | 13.75   | 195.65 | 1.00E-04 | #DIV/0! |
| ENSG00000103811 | <b>CTSH</b>   | 15.38   | 1.44    | 0.09  | 1.67E-06 | 0.2     | 32.69   | 4.18    | 0.13   | 0.00E+00 | 0.7     |
| ENSG00000143387 | <b>CTSK</b>   | 6.94    | 6.64    | 0.96  | 7.90E-03 | 1.0     | 4.79    | 6.78    | 1.42   | 7.40E-03 | 1.0     |
| ENSG00000256043 | <b>CTSO</b>   | 18.67   | 8.72    | 0.47  | 0.00E+00 | 9.7     | 15.74   | 6.99    | 0.44   | 2.00E-04 | 8.0     |
| ENSG00000080166 | <b>DCT</b>    | 0.30    | 0.09    | 0.31  | 5.00E-04 | 3.5     | 0.14    | 2.97    | 21.91  | NS       | 67.0    |
| ENSG00000197635 | <b>DPP4</b>   | 14.18   | 9.55    | 0.67  | 1.00E-04 | 2.5     | 24.22   | 137.71  | 5.69   | NS       | 42.3    |
| ENSG00000276023 | <b>DUSP14</b> | 2.89    | 36.78   | 12.72 | 1.30E-03 | 3.7     | 3.54    | 44.36   | 12.53  | 1.40E-03 | 4.8     |
| ENSG00000139318 | <b>DUSP6</b>  | 17.32   | 48.77   | 2.82  | NS       | 0.7     | 11.26   | 36.12   | 3.21   | NS       | 0.3     |
| ENSG00000126218 | <b>F10</b>    | 77.41   | 0.29    | 0.00  | 3.90E-08 | 0.4     | 70.46   | 11.16   | 0.16   | 0.00E+00 | 4.3     |
| ENSG00000088926 | <b>F11</b>    | 92.80   | 0.02    | 0.00  | 7.33E-10 | 0.0     | 120.20  | 0.04    | 0.00   | 3.75E-09 | 0.2     |
| ENSG00000131187 | <b>F12</b>    | 350.76  | 0.55    | 0.00  | 1.11E-07 | 0.4     | 557.22  | 1.40    | 0.00   | 5.76E-07 | 1.4     |
| ENSG00000143278 | <b>F13B</b>   | 74.90   | 0.00    | 0.00  | 4.18E-08 | #DIV/0! | 82.96   | 0.09    | 0.00   | 3.10E-07 | 6.2     |
| ENSG00000180210 | <b>F2</b>     | 987.30  | 1.17    | 0.00  | 7.84E-08 | 11.0    | 834.58  | 20.52   | 0.02   | 1.21E-07 | 98.8    |
| ENSG00000164220 | <b>F2RL2</b>  | 0.66    | 0.27    | 0.40  | NS       | 0.2     | 0.09    | 10.38   | 121.91 | NS       | 38.2    |
| ENSG00000117525 | <b>F3</b>     | 1.20    | 24.73   | 20.65 | 4.00E-04 | 2.7     | 0.43    | 66.00   | 154.20 | 4.00E-04 | 13.9    |
| ENSG00000185010 | <b>F8</b>     | 2.69    | 1.47    | 0.55  | 3.30E-03 | 1.4     | 1.32    | 0.89    | 0.68   | 1.30E-03 | 0.6     |
| ENSG00000101981 | <b>F9</b>     | 279.73  | 0.00    | 0.00  | 6.28E-09 | #DIV/0! | 195.21  | 0.08    | 0.00   | 1.85E-08 | 1.0     |
| ENSG00000166147 | <b>FBN1</b>   | 0.75    | 10.97   | 14.57 | NS       | 2.0     | 0.38    | 27.22   | 71.28  | NS       | 5.4     |
| ENSG00000171560 | <b>FGA</b>    | 3563.87 | 33.57   | 0.01  | 7.81E-07 | 48.3    | 2533.82 | 502.27  | 0.20   | 5.32E-06 | 633.0   |
| ENSG00000171557 | <b>FGG</b>    | 2253.42 | 21.40   | 0.01  | 1.67E-06 | 55.8    | 1507.47 | 173.50  | 0.12   | 1.00E-04 | 410.9   |
| ENSG00000115414 | <b>FN1</b>    | 272.71  | 1865.14 | 6.84  | NS       | 31.9    | 256.27  | 2388.22 | 9.32   | NS       | 62.2    |
| ENSG00000140564 | <b>FURIN</b>  | 102.48  | 173.72  | 1.70  | 1.20E-03 | 5.9     | 91.83   | 125.72  | 1.37   | 7.00E-04 | 5.0     |
| ENSG00000010810 | <b>FYN</b>    | 5.78    | 48.64   | 8.41  | 4.70E-03 | 2.2     | 4.22    | 48.76   | 11.55  | NS       | 2.0     |
| ENSG00000119125 | <b>GDA</b>    | 16.42   | 0.43    | 0.03  | 2.33E-08 | 0.9     | 14.14   | 0.52    | 0.04   | 5.00E-07 | 1.9     |
| ENSG00000172354 | <b>GNB2</b>   | 37.17   | 190.71  | 5.13  | NS       | 2.2     | 39.85   | 187.88  | 4.71   | NS       | 2.2     |
| ENSG00000172380 | <b>GNG12</b>  | 9.69    | 90.15   | 9.31  | NS       | 2.6     | 8.06    | 77.13   | 9.57   | NS       | 2.0     |
| ENSG00000148180 | <b>GSN</b>    | 6.57    | 44.00   | 6.69  | NS       | 4.3     | 2.43    | 59.43   | 24.42  | NS       | 5.9     |
| ENSG00000134240 | <b>HMGCS2</b> | 874.78  | 2.85    | 0.00  | 1.00E-06 | 73.8    | 1059.55 | 27.36   | 0.03   | 1.64E-07 | 133.9   |
| ENSG00000101076 | <b>HNF4A</b>  | 100.42  | 0.57    | 0.01  | 3.22E-08 | 92.0    | 93.59   | 32.79   | 0.35   | 4.00E-04 | 553.1   |

|                 |               |         |        |         |          |         |        |        |         |          |         |
|-----------------|---------------|---------|--------|---------|----------|---------|--------|--------|---------|----------|---------|
| ENSG00000105707 | <b>HPN</b>    | 374.09  | 15.06  | 0.04    | 1.72E-06 | 1.4     | 396.67 | 30.54  | 0.08    | 5.11E-06 | 3.0     |
| ENSG00000113905 | <b>HRG</b>    | 1116.51 | 0.06   | 0.00    | 3.54E-09 | 0.7     | 965.07 | 0.82   | 0.00    | 1.09E-07 | 2.9     |
| ENSG00000166033 | <b>HTRA1</b>  | 45.34   | 1.15   | 0.03    | 7.40E-08 | 0.0     | 31.27  | 12.11  | 0.39    | 0.00E+00 | 0.4     |
| ENSG00000136003 | <b>ISCU</b>   | 18.78   | 72.31  | 3.85    | NS       | 2.1     | 19.06  | 86.56  | 4.54    | NS       | 2.5     |
| ENSG00000164171 | <b>ITGA2</b>  | 0.08    | 256.71 | 3326.75 | 1.00E-07 | 41.4    | 0.06   | 63.24  | 999.25  | 0.00E+00 | 15.9    |
| ENSG00000259207 | <b>ITGB3</b>  | 0.95    | 3.41   | 3.59    | NS       | 25.0    | 0.63   | 5.51   | 8.72    | NS       | 45.4    |
| ENSG00000055957 | <b>ITIH1</b>  | 727.41  | 0.01   | 0.00    | 1.29E-09 | #DIV/0! | 764.58 | 0.27   | 0.00    | 3.43E-09 | 1.3     |
| ENSG00000118263 | <b>KLF7</b>   | 2.31    | 22.59  | 9.79    | NS       | 2.1     | 2.11   | 13.40  | 6.34    | NS       | 1.1     |
| ENSG00000129455 | <b>KLK8</b>   | 0.01    | 1.76   | 134.77  | 7.71E-06 | 1.3     | 0.01   | 1.44   | 128.58  | NS       | 1.3     |
| ENSG00000164344 | <b>KLKB1</b>  | 164.07  | 0.32   | 0.00    | 1.33E-09 | 0.0     | 170.45 | 0.27   | 0.00    | 5.59E-09 | 0.0     |
| ENSG00000005893 | <b>LAMP2</b>  | 43.74   | 113.26 | 2.59    | NS       | 4.8     | 36.59  | 137.60 | 3.76    | NS       | 6.1     |
| ENSG00000143768 | <b>LEFTY2</b> | 0.07    | 0.18   | 2.56    | NS       | 0.0     | 0.06   | 2.87   | 46.97   | NS       | 0.2     |
| ENSG00000100600 | <b>LGMN</b>   | 22.16   | 64.88  | 2.93    | NS       | 1.7     | 19.00  | 74.32  | 3.91    | NS       | 1.3     |
| ENSG00000123384 | <b>LRP1</b>   | 44.14   | 76.99  | 1.74    | 9.00E-04 | 1.7     | 39.32  | 111.59 | 2.84    | 9.60E-03 | 2.5     |
| ENSG00000111144 | <b>LTA4H</b>  | 7.78    | 35.05  | 4.51    | NS       | 0.5     | 6.12   | 35.92  | 5.86    | NS       | 0.5     |
| ENSG00000185022 | <b>MAFF</b>   | 0.32    | 27.25  | 84.69   | 1.00E-04 | 8.6     | 0.14   | 16.31  | 115.54  | 3.00E-04 | 6.8     |
| ENSG00000009724 | <b>MASP2</b>  | 61.33   | 0.02   | 0.00    | 4.24E-10 | 0.1     | 66.83  | 0.13   | 0.00    | 6.53E-09 | 0.2     |
| ENSG00000165471 | <b>MBL2</b>   | 38.25   | 0.28   | 0.01    | 7.57E-06 | #DIV/0! | 63.80  | 0.93   | 0.01    | 0.00E+00 | 50.1    |
| ENSG00000112818 | <b>MEP1A</b>  | 0.01    | 0.75   | 91.25   | NS       | 32.1    | 0.02   | 2.89   | 137.86  | NS       | #DIV/0! |
| ENSG00000196611 | <b>MMP1</b>   | 0.01    | 0.19   | 15.66   | NS       | 0.6     | 0.01   | 11.82  | 1116.54 | 7.00E-04 | 719.2   |
| ENSG00000166670 | <b>MMP10</b>  | 0.01    | 0.20   | 14.66   | 1.00E-03 | 0.3     | 0.01   | 0.74   | 62.73   | 5.00E-04 | 3.3     |
| ENSG00000099953 | <b>MMP11</b>  | 0.19    | 0.56   | 2.90    | NS       | 0.3     | 0.08   | 2.77   | 32.77   | 1.50E-03 | 1.3     |
| ENSG00000157227 | <b>MMP14</b>  | 5.72    | 525.09 | 91.87   | 3.78E-06 | 9.9     | 3.10   | 498.85 | 161.03  | 7.19E-06 | 6.3     |
| ENSG00000102996 | <b>MMP15</b>  | 19.50   | 56.58  | 2.90    | NS       | 1.6     | 20.52  | 55.21  | 2.69    | NS       | 1.6     |
| ENSG00000087245 | <b>MMP2</b>   | 2.86    | 269.63 | 94.41   | 0.00E+00 | 10.6    | 1.11   | 127.41 | 114.57  | NS       | 5.5     |
| ENSG00000149968 | <b>MMP3</b>   | 0.01    | 0.08   | 6.71    | NS       | #DIV/0! | 0.01   | 0.04   | 3.94    | NS       | 2.5     |
| ENSG00000137673 | <b>MMP7</b>   | 0.47    | 0.02   | 0.04    | 1.00E-04 | #DIV/0! | 0.94   | 0.05   | 0.06    | 2.00E-04 | #DIV/0! |
| ENSG00000100985 | <b>MMP9</b>   | 0.52    | 41.98  | 80.33   | 1.00E-04 | 13.8    | 0.10   | 5.16   | 52.57   | NS       | 1.3     |
| ENSG00000148450 | <b>MSRB2</b>  | 23.18   | 19.67  | 0.85    | 1.00E-04 | 2.3     | 26.87  | 23.78  | 0.89    | 1.00E-04 | 2.2     |
| ENSG00000173531 | <b>MST1</b>   | 233.30  | 5.38   | 0.02    | 8.84E-06 | 3.2     | 223.95 | 7.11   | 0.03    | 0.00E+00 | 4.3     |
| ENSG00000173391 | <b>OLR1</b>   | 0.14    | 0.24   | 1.77    | NS       | #DIV/0! | 0.03   | 5.54   | 162.38  | NS       | 523.0   |
| ENSG00000169860 | <b>P2RY1</b>  | 0.08    | 1.49   | 18.58   | NS       | 0.1     | 0.04   | 1.45   | 33.43   | NS       | 0.1     |
| ENSG00000100311 | <b>PDGFB</b>  | 1.88    | 59.13  | 31.41   | 2.00E-04 | 10.2    | 2.61   | 30.43  | 11.65   | NS       | 9.1     |

|                 |          |         |        |        |          |         |         |        |        |          |         |
|-----------------|----------|---------|--------|--------|----------|---------|---------|--------|--------|----------|---------|
| ENSG00000261371 | PECAMI   | 3.94    | 0.08   | 0.02   | 0.00E+00 | 0.2     | 1.58    | 0.18   | 0.12   | 2.00E-04 | 0.4     |
| ENSG00000162517 | PEF1     | 21.61   | 115.51 | 5.35   | NS       | 2.4     | 28.10   | 134.10 | 4.77   | NS       | 2.6     |
| ENSG00000163737 | PF4      | 0.69    | 0.00   | 0.00   | 2.80E-03 | 0.0     | 0.14    | 0.00   | 0.00   | 2.90E-03 | 0.0     |
| ENSG00000104368 | PLAT     | 1.41    | 7.52   | 5.33   | NS       | 2.8     | 0.31    | 5.01   | 16.05  | NS       | 0.8     |
| ENSG00000122861 | PLAU     | 0.93    | 136.95 | 147.74 | 9.51E-06 | 4.1     | 0.37    | 28.48  | 76.00  | 2.80E-03 | 0.8     |
| ENSG00000115956 | PLEK     | 3.12    | 0.06   | 0.02   | 1.00E-04 | 6.0     | 1.06    | 0.08   | 0.07   | 1.00E-04 | 1.9     |
| ENSG00000122194 | PLG      | 531.41  | 0.15   | 0.00   | 6.04E-09 | 7.3     | 580.42  | 0.29   | 0.00   | 2.06E-08 | 1.7     |
| ENSG00000085377 | PREP     | 6.19    | 38.87  | 6.28   | NS       | 0.7     | 5.49    | 37.05  | 6.75   | NS       | 0.6     |
| ENSG00000115718 | PROC     | 291.96  | 0.08   | 0.00   | 1.81E-08 | 0.1     | 321.57  | 1.16   | 0.00   | 2.27E-07 | 1.9     |
| ENSG00000184500 | PROS1    | 83.88   | 7.80   | 0.09   | 2.25E-06 | 6.1     | 74.24   | 49.81  | 0.67   | 1.00E-04 | 25.2    |
| ENSG00000126231 | PROZ     | 184.70  | 0.14   | 0.00   | 6.02E-07 | 7.3     | 106.03  | 0.84   | 0.01   | 2.74E-06 | 14.0    |
| ENSG00000150687 | PRSS23   | 1.73    | 44.92  | 25.99  | 5.00E-04 | 15.0    | 1.04    | 56.86  | 54.92  | 5.00E-04 | 26.5    |
| ENSG00000183155 | RAB1F    | 3.09    | 23.29  | 7.53   | NS       | 2.0     | 3.68    | 28.95  | 7.86   | NS       | 2.9     |
| ENSG00000136238 | RAC1     | 46.35   | 308.54 | 6.66   | NS       | 1.4     | 41.01   | 287.37 | 7.01   | NS       | 1.3     |
| ENSG00000079337 | RAPGEF3  | 0.85    | 1.40   | 1.64   | 3.30E-03 | 1.1     | 0.62    | 1.03   | 1.66   | 7.00E-04 | 0.5     |
| ENSG00000130988 | RGN      | 162.41  | 0.37   | 0.00   | 4.15E-07 | 0.2     | 171.48  | 3.79   | 0.02   | 6.98E-07 | 3.2     |
| ENSG00000160678 | S100A1   | 0.89    | 0.13   | 0.14   | 8.69E-06 | 1.0     | 0.68    | 0.41   | 0.60   | 1.00E-04 | 0.9     |
| ENSG00000189171 | S100A13  | 13.43   | 128.35 | 9.56   | 2.60E-03 | 5.3     | 6.82    | 107.30 | 15.72  | NS       | 3.9     |
| ENSG00000197249 | SERPINA1 | 3218.49 | 2.16   | 0.00   | 2.41E-08 | 28.9    | 2099.11 | 11.57  | 0.01   | 6.39E-07 | 23.5    |
| ENSG00000197632 | SERPINB2 | 0.01    | 0.98   | 110.63 | 2.78E-06 | 2.1     | 0.01    | 1.56   | 205.10 | NS       | #DIV/0! |
| ENSG00000117601 | SERPINC1 | 2139.15 | 0.79   | 0.00   | 1.82E-09 | #DIV/0! | 2028.29 | 11.99  | 0.01   | 5.63E-07 | 20.7    |
| ENSG00000106366 | SERPINE1 | 6.63    | 623.82 | 94.12  | 2.00E-04 | 70.5    | 17.41   | 294.22 | 16.90  | 3.80E-03 | 30.8    |
| ENSG00000149131 | SERPING1 | 1068.32 | 133.31 | 0.12   | 1.16E-06 | 4.3     | 759.02  | 93.00  | 0.12   | 0.00E+00 | 2.4     |
| ENSG00000160999 | SH2B2    | 0.72    | 5.99   | 8.36   | 6.10E-03 | 0.8     | 0.45    | 8.58   | 19.22  | 2.50E-03 | 1.1     |
| ENSG00000068903 | SIRT2    | 11.16   | 20.47  | 1.83   | 9.00E-04 | 6.6     | 10.74   | 24.90  | 2.32   | 4.30E-03 | 8.5     |
| ENSG00000113140 | SPARC    | 29.27   | 577.14 | 19.71  | NS       | 2.7     | 13.68   | 828.99 | 60.61  | 6.90E-03 | 3.9     |
| ENSG00000091513 | TF       | 2547.50 | 0.99   | 0.00   | 1.17E-08 | 13.3    | 2049.92 | 12.10  | 0.01   | 1.52E-07 | 23.6    |
| ENSG00000105825 | TFPI2    | 0.44    | 84.87  | 192.84 | NS       | 9.0     | 0.35    | 20.34  | 57.72  | NS       | 2.2     |
| ENSG00000178726 | THBD     | 1.69    | 50.17  | 29.62  | 4.00E-04 | 110.8   | 0.51    | 33.32  | 65.64  | 1.30E-03 | 101.2   |
| ENSG00000137801 | THBS1    | 2.79    | 458.39 | 164.53 | 2.00E-04 | 14.8    | 0.89    | 139.88 | 157.07 | 2.90E-03 | 5.1     |
| ENSG00000102265 | TIMP1    | 50.91   | 148.58 | 2.92   | NS       | 2.8     | 17.47   | 146.55 | 8.39   | NS       | 2.6     |
| ENSG00000100234 | TIMP3    | 18.35   | 281.81 | 15.36  | 3.60E-03 | 40.0    | 13.89   | 215.61 | 15.52  | NS       | 23.2    |
| ENSG00000187045 | TMPRSS6  | 130.48  | 0.11   | 0.00   | 1.77E-07 | 3.4     | 135.29  | 0.84   | 0.01   | 1.80E-07 | 10.4    |

|                 |       |       |        |       |          |     |       |        |       |          |     |
|-----------------|-------|-------|--------|-------|----------|-----|-------|--------|-------|----------|-----|
| ENSG00000102226 | USP11 | 4.23  | 54.76  | 12.96 | 2.00E-04 | 0.9 | 4.42  | 64.25  | 14.53 | 4.00E-04 | 1.2 |
| ENSG00000110799 | VWF   | 2.20  | 1.73   | 0.79  | 4.30E-03 | 3.4 | 0.76  | 0.77   | 1.02  | 2.50E-03 | 0.5 |
| ENSG00000071127 | WDR1  | 11.41 | 340.01 | 29.81 | 0.00E+00 | 2.4 | 10.60 | 325.80 | 30.73 | 1.00E-04 | 2.3 |

### Hallmark Complement

|                 |          |         |        |        |          |         |         |        |        |          |         |
|-----------------|----------|---------|--------|--------|----------|---------|---------|--------|--------|----------|---------|
| ENSG00000077522 | ACTN2    | 0.02    | 2.49   | 112.92 | 1.00E-04 | 1.6     | 0.02    | 1.79   | 95.10  | NS       | 1.1     |
| ENSG00000168615 | ADAM9    | 1.33    | 165.50 | 124.29 | 3.30E-03 | 14.0    | 1.26    | 208.89 | 165.63 | 2.80E-03 | 15.0    |
| ENSG00000274286 | ADRA2B   | 4.02    | 0.72   | 0.18   | 6.35E-06 | 0.1     | 3.06    | 1.06   | 0.35   | 2.00E-04 | 0.2     |
| ENSG00000108599 | AKAP10   | 3.88    | 30.25  | 7.80   | NS       | 2.6     | 3.67    | 35.10  | 9.57   | NS       | 2.9     |
| ENSG00000214274 | ANG      | 548.51  | 2.55   | 0.00   | 7.74E-09 | 0.9     | 710.63  | 7.80   | 0.01   | 6.41E-08 | 3.0     |
| ENSG00000164111 | ANXA5    | 25.16   | 769.00 | 30.57  | 1.00E-04 | 3.2     | 13.22   | 614.27 | 46.46  | 3.00E-04 | 2.9     |
| ENSG00000110244 | APOA4    | 28.41   | 4.83   | 0.17   | 5.00E-04 | 71.6    | 10.25   | 61.28  | 5.98   | NS       | 2667.0  |
| ENSG00000128394 | APOBEC3F | 1.44    | 3.92   | 2.72   | NS       | 1.3     | 0.76    | 2.77   | 3.65   | NS       | 1.0     |
| ENSG00000239713 | APOBEC3G | 1.47    | 2.07   | 1.41   | NS       | 3.2     | 0.47    | 0.75   | 1.61   | 5.10E-03 | 1.1     |
| ENSG00000130208 | APOC1    | 5444.72 | 12.09  | 0.00   | 5.89E-07 | 0.3     | 5644.64 | 204.01 | 0.04   | 0.00E+00 | 3.4     |
| ENSG00000177556 | ATOX1    | 13.69   | 11.87  | 0.87   | 6.00E-04 | 1.3     | 18.87   | 15.30  | 0.81   | 1.40E-03 | 1.7     |
| ENSG00000096070 | BRPF3    | 4.86    | 65.16  | 13.42  | NS       | 2.3     | 6.40    | 67.14  | 10.49  | NS       | 2.3     |
| ENSG00000173372 | C1QA     | 67.20   | 0.00   | 0.00   | 4.08E-06 | #DIV/0! | 22.25   | 0.03   | 0.00   | 5.95E-06 | 1.2     |
| ENSG00000159189 | C1QC     | 32.85   | 0.00   | 0.00   | 1.00E-04 | #DIV/0! | 7.72    | 0.00   | 0.00   | 1.00E-04 | #DIV/0! |
| ENSG00000159403 | C1R      | 793.04  | 0.48   | 0.00   | 6.51E-10 | 0.1     | 660.37  | 5.11   | 0.01   | 2.11E-06 | 1.0     |
| ENSG00000182326 | C1S      | 722.07  | 1.59   | 0.00   | 3.18E-09 | 0.5     | 647.15  | 13.04  | 0.02   | 6.05E-07 | 2.4     |
| ENSG00000166278 | C2       | 81.25   | 0.20   | 0.00   | 9.58E-09 | 2.1     | 68.43   | 0.26   | 0.00   | 1.25E-08 | 2.0     |
| ENSG00000125730 | C3       | 1773.54 | 14.49  | 0.01   | 1.54E-07 | 5.7     | 1456.62 | 7.61   | 0.01   | 0.00E+00 | 3.3     |
| ENSG00000123843 | C4BPB    | 144.00  | 0.48   | 0.00   | 1.48E-08 | #DIV/0! | 144.81  | 2.67   | 0.02   | 2.56E-07 | #DIV/0! |
| ENSG00000113600 | C9       | 432.26  | 0.04   | 0.00   | 8.24E-08 | 1.2     | 183.18  | 0.12   | 0.00   | 1.34E-07 | 0.6     |
| ENSG00000104267 | CA2      | 61.14   | 8.06   | 0.13   | 2.07E-06 | 0.7     | 69.17   | 28.19  | 0.41   | 1.00E-04 | 3.4     |
| ENSG00000198668 | CALM1    | 31.51   | 143.60 | 4.56   | NS       | 1.3     | 32.73   | 188.25 | 5.75   | NS       | 1.1     |
| ENSG00000160014 | CALM3    | 45.77   | 201.24 | 4.40   | NS       | 0.9     | 47.59   | 273.20 | 5.74   | NS       | 1.1     |
| ENSG00000137752 | CASP1    | 3.78    | 0.24   | 0.06   | 0.00E+00 | #DIV/0! | 1.68    | 0.23   | 0.14   | 0.00E+00 | 13.0    |
| ENSG00000003400 | CASP10   | 3.12    | 0.36   | 0.12   | 2.88E-07 | 0.1     | 2.30    | 2.17   | 0.94   | 1.10E-03 | 1.5     |
| ENSG00000164305 | CASP3    | 12.54   | 110.74 | 8.83   | 2.30E-03 | 0.9     | 9.73    | 82.36  | 8.47   | NS       | 0.7     |
| ENSG00000196954 | CASP4    | 5.72    | 7.03   | 1.23   | 1.20E-03 | 51.0    | 3.33    | 6.20   | 1.86   | NS       | 134.2   |
| ENSG00000137757 | CASP5    | 0.05    | 0.07   | 1.57   | NS       | #DIV/0! | 0.03    | 0.13   | 5.03   | NS       | #DIV/0! |
| ENSG00000165806 | CASP7    | 6.25    | 24.41  | 3.91   | NS       | 6.5     | 8.02    | 15.74  | 1.96   | NS       | 3.6     |

|                 |               |        |        |       |          |         |        |        |        |          |         |
|-----------------|---------------|--------|--------|-------|----------|---------|--------|--------|--------|----------|---------|
| ENSG00000132906 | <b>CASP9</b>  | 4.95   | 7.96   | 1.61  | NS       | 0.9     | 2.95   | 9.86   | 3.34   | NS       | 0.9     |
| ENSG00000114423 | <b>CBLB</b>   | 1.99   | 17.64  | 8.85  | 7.40E-03 | 2.0     | 2.37   | 16.30  | 6.87   | NS       | 1.9     |
| ENSG00000271503 | <b>CCL5</b>   | 6.67   | 0.05   | 0.01  | 0.00E+00 | 0.4     | 1.45   | 0.03   | 0.02   | 0.00E+00 | 0.6     |
| ENSG00000135218 | <b>CD36</b>   | 3.83   | 0.01   | 0.00  | 1.93E-06 | 0.0     | 4.19   | 0.11   | 0.03   | 0.00E+00 | 0.3     |
| ENSG00000102245 | <b>CD40LG</b> | 0.42   | 0.00   | 0.00  | 5.26E-06 | #DIV/0! | 0.32   | 0.00   | 0.00   | 6.31E-06 | #DIV/0! |
| ENSG00000117335 | <b>CD46</b>   | 22.36  | 97.91  | 4.38  | NS       | 1.5     | 26.52  | 99.17  | 3.74   | NS       | 1.4     |
| ENSG00000196352 | <b>CD55</b>   | 2.09   | 32.23  | 15.43 | NS       | 2.8     | 1.47   | 87.61  | 59.57  | 8.10E-03 | 8.2     |
| ENSG00000085063 | <b>CD59</b>   | 39.62  | 186.94 | 4.72  | NS       | 5.1     | 34.45  | 141.54 | 4.11   | NS       | 4.0     |
| ENSG00000158825 | <b>CDA</b>    | 34.51  | 0.00   | 0.00  | 1.04E-08 | 0.0     | 36.58  | 0.32   | 0.01   | 1.99E-06 | 0.0     |
| ENSG00000140945 | <b>CDH13</b>  | 0.16   | 1.75   | 10.88 | NS       | 1.1     | 0.03   | 2.80   | 107.60 | NS       | 3.5     |
| ENSG00000176749 | <b>CDK5R1</b> | 0.81   | 6.15   | 7.57  | NS       | 0.7     | 0.76   | 16.15  | 21.32  | NS       | 1.6     |
| ENSG00000172216 | <b>CEBPB</b>  | 46.16  | 85.80  | 1.86  | 1.50E-03 | 10.2    | 58.76  | 78.50  | 1.34   | 1.20E-03 | 9.1     |
| ENSG00000243649 | <b>CFB</b>    | 463.52 | 0.32   | 0.00  | 7.08E-08 | 9.3     | 359.88 | 1.70   | 0.00   | 3.80E-07 | 11.7    |
| ENSG00000000971 | <b>CFH</b>    | 354.48 | 0.00   | 0.00  | 1.96E-09 | 0.0     | 287.45 | 0.37   | 0.00   | 1.19E-07 | 6.5     |
| ENSG00000120885 | <b>CLU</b>    | 859.16 | 23.62  | 0.03  | 1.77E-08 | 0.2     | 749.50 | 52.36  | 0.07   | 2.38E-07 | 0.7     |
| ENSG00000134871 | <b>COL4A2</b> | 3.34   | 81.45  | 24.36 | 7.50E-03 | 1.6     | 1.65   | 341.85 | 207.09 | 7.00E-04 | 7.2     |
| ENSG00000047457 | <b>CP</b>     | 352.74 | 0.03   | 0.00  | 7.60E-08 | 0.0     | 196.89 | 3.79   | 0.02   | 2.00E-04 | 4.5     |
| ENSG00000135678 | <b>CPM</b>    | 6.01   | 2.18   | 0.36  | 1.00E-04 | 4.5     | 4.96   | 2.02   | 0.41   | 3.00E-04 | 6.2     |
| ENSG00000203710 | <b>CR1</b>    | 0.21   | 0.00   | 0.00  | 3.80E-03 | 0.0     | 0.02   | 0.02   | 0.71   | NS       | 0.1     |
| ENSG00000117322 | <b>CR2</b>    | 0.02   | 0.06   | 2.24  | NS       | 0.0     | 0.01   | 0.18   | 14.21  | NS       | 0.0     |
| ENSG00000159176 | <b>CSRP1</b>  | 17.24  | 50.82  | 2.95  | NS       | 7.1     | 15.99  | 35.90  | 2.25   | NS       | 5.2     |
| ENSG00000164733 | <b>CTSB</b>   | 153.65 | 419.75 | 2.73  | NS       | 30.7    | 100.71 | 281.13 | 2.79   | 6.70E-03 | 23.8    |
| ENSG00000109861 | <b>CTSC</b>   | 4.07   | 13.15  | 3.23  | NS       | 0.2     | 0.77   | 11.32  | 14.65  | NS       | 0.1     |
| ENSG00000117984 | <b>CTSD</b>   | 361.54 | 209.38 | 0.58  | 0.00E+00 | 1.3     | 254.41 | 468.06 | 1.84   | 2.40E-03 | 3.0     |
| ENSG00000103811 | <b>CTSH</b>   | 15.38  | 1.44   | 0.09  | 1.67E-06 | 0.2     | 32.69  | 4.18   | 0.13   | 0.00E+00 | 0.7     |
| ENSG00000256043 | <b>CTSO</b>   | 18.67  | 8.72   | 0.47  | 0.00E+00 | 9.7     | 15.74  | 6.99   | 0.44   | 2.00E-04 | 8.0     |
| ENSG00000163131 | <b>CTSS</b>   | 12.91  | 0.13   | 0.01  | 0.00E+00 | 8.6     | 5.49   | 0.08   | 0.01   | 0.00E+00 | 1.5     |
| ENSG00000163739 | <b>CXCL1</b>  | 1.00   | 3.41   | 3.41  | NS       | 2.5     | 0.60   | 2.14   | 3.59   | NS       | 1.0     |
| ENSG00000058866 | <b>DGKG</b>   | 0.14   | 0.13   | 0.90  | 1.30E-03 | 0.6     | 0.10   | 0.34   | 3.35   | NS       | 1.2     |
| ENSG00000102780 | <b>DGKH</b>   | 0.44   | 8.08   | 18.52 | 1.60E-03 | 2.9     | 0.35   | 4.43   | 12.57  | NS       | 1.6     |
| ENSG00000135905 | <b>DOCK10</b> | 0.89   | 0.03   | 0.03  | 1.00E-04 | 0.1     | 0.52   | 0.48   | 0.93   | 3.60E-03 | 1.2     |
| ENSG00000128512 | <b>DOCK4</b>  | 2.70   | 14.85  | 5.49  | NS       | 1.3     | 2.65   | 14.46  | 5.45   | NS       | 1.1     |
| ENSG00000088387 | <b>DOCK9</b>  | 2.34   | 60.04  | 25.65 | 9.00E-04 | 4.8     | 1.98   | 75.87  | 38.40  | 6.10E-03 | 9.7     |

|                 |               |        |         |        |          |         |        |         |        |          |         |
|-----------------|---------------|--------|---------|--------|----------|---------|--------|---------|--------|----------|---------|
| ENSG00000197635 | <b>DPP4</b>   | 14.18  | 9.55    | 0.67   | 1.00E-04 | 2.5     | 24.22  | 137.71  | 5.69   | NS       | 42.3    |
| ENSG00000138166 | <b>DUSP5</b>  | 3.86   | 264.36  | 68.56  | 0.00E+00 | 7.5     | 2.19   | 139.50  | 63.83  | 4.00E-04 | 4.0     |
| ENSG00000139318 | <b>DUSP6</b>  | 17.32  | 48.77   | 2.82   | NS       | 0.7     | 11.26  | 36.12   | 3.21   | NS       | 0.3     |
| ENSG00000127334 | <b>DYRK2</b>  | 0.94   | 20.07   | 21.38  | NS       | 1.2     | 0.89   | 13.78   | 15.45  | NS       | 0.7     |
| ENSG00000110047 | <b>EHD1</b>   | 5.86   | 60.32   | 10.29  | 1.00E-03 | 3.8     | 5.90   | 64.74   | 10.97  | 3.20E-03 | 4.3     |
| ENSG00000164308 | <b>ERAP2</b>  | 5.50   | 10.93   | 1.99   | NS       | 84.1    | 0.79   | 0.30    | 0.38   | 1.30E-03 | 6.2     |
| ENSG00000126218 | <b>F10</b>    | 77.41  | 0.29    | 0.00   | 3.90E-08 | 0.4     | 70.46  | 11.16   | 0.16   | 0.00E+00 | 4.3     |
| ENSG00000180210 | <b>F2</b>     | 987.30 | 1.17    | 0.00   | 7.84E-08 | 11.0    | 834.58 | 20.52   | 0.02   | 1.21E-07 | 98.8    |
| ENSG00000117525 | <b>F3</b>     | 1.20   | 24.73   | 20.65  | 4.00E-04 | 2.7     | 0.43   | 66.00   | 154.20 | 4.00E-04 | 13.9    |
| ENSG00000198734 | <b>F5</b>     | 49.86  | 0.06    | 0.00   | 1.25E-06 | 1.0     | 51.44  | 1.43    | 0.03   | 0.00E+00 | 11.4    |
| ENSG00000057593 | <b>F7</b>     | 89.93  | 0.10    | 0.00   | 6.11E-07 | 0.3     | 116.37 | 2.56    | 0.02   | 5.20E-06 | 6.4     |
| ENSG00000185010 | <b>F8</b>     | 2.69   | 1.47    | 0.55   | 3.30E-03 | 1.4     | 1.32   | 0.89    | 0.68   | 1.30E-03 | 0.6     |
| ENSG00000158869 | <b>FCER1G</b> | 14.87  | 0.99    | 0.07   | 1.00E-04 | 1.7     | 6.19   | 1.84    | 0.30   | 4.00E-04 | 2.3     |
| ENSG00000085265 | <b>FCN1</b>   | 0.92   | 0.00    | 0.00   | 6.54E-07 | #DIV/0! | 0.51   | 0.01    | 0.02   | 2.65E-06 | #DIV/0! |
| ENSG00000137714 | <b>FDX1</b>   | 22.41  | 25.03   | 1.12   | 0.00E+00 | 1.8     | 22.47  | 34.04   | 1.51   | 2.00E-04 | 2.3     |
| ENSG00000115414 | <b>FN1</b>    | 272.71 | 1865.14 | 6.84   | NS       | 31.9    | 256.27 | 2388.22 | 9.32   | NS       | 62.2    |
| ENSG00000010810 | <b>FYN</b>    | 5.78   | 48.64   | 8.41   | 4.70E-03 | 2.2     | 4.22   | 48.76   | 11.55  | NS       | 2.0     |
| ENSG00000107485 | <b>GATA3</b>  | 0.50   | 208.29  | 420.47 | 7.72E-07 | 747.8   | 0.29   | 184.56  | 639.65 | 2.45E-06 | 607.1   |
| ENSG00000115271 | <b>GCA</b>    | 2.59   | 28.06   | 10.83  | 2.50E-03 | 1.2     | 2.09   | 25.07   | 12.00  | NS       | 0.9     |
| ENSG00000197045 | <b>GMFB</b>   | 3.98   | 61.61   | 15.50  | 9.50E-03 | 1.1     | 3.19   | 97.26   | 30.47  | 3.80E-03 | 1.2     |
| ENSG00000114353 | <b>GNAI2</b>  | 25.45  | 41.03   | 1.61   | 2.00E-04 | 0.6     | 21.28  | 61.83   | 2.91   | 4.40E-03 | 0.7     |
| ENSG00000065135 | <b>GNAI3</b>  | 2.19   | 23.73   | 10.85  | 1.40E-03 | 1.7     | 2.09   | 21.20   | 10.14  | NS       | 1.4     |
| ENSG00000172354 | <b>GNB2</b>   | 37.17  | 190.71  | 5.13   | NS       | 2.2     | 39.85  | 187.88  | 4.71   | NS       | 2.2     |
| ENSG00000114450 | <b>GNB4</b>   | 0.31   | 35.25   | 113.24 | NS       | 1.6     | 0.15   | 43.40   | 291.43 | NS       | 1.8     |
| ENSG00000186469 | <b>GNG2</b>   | 1.04   | 1.16    | 1.11   | 9.70E-03 | 0.1     | 0.58   | 17.81   | 30.60  | NS       | 1.0     |
| ENSG00000167083 | <b>GNGT2</b>  | 0.51   | 0.00    | 0.00   | 0.00E+00 | 0.0     | 0.20   | 0.05    | 0.26   | 1.00E-04 | 0.1     |
| ENSG00000115159 | <b>GPD2</b>   | 1.07   | 38.54   | 36.08  | 2.00E-04 | 1.2     | 0.70   | 46.91   | 66.77  | 2.00E-04 | 1.4     |
| ENSG00000177885 | <b>GRB2</b>   | 15.97  | 80.56   | 5.05   | NS       | 1.2     | 16.18  | 90.04   | 5.57   | NS       | 1.3     |
| ENSG00000145649 | <b>GZMA</b>   | 3.44   | 0.00    | 0.00   | 3.23E-06 | #DIV/0! | 1.68   | 0.00    | 0.00   | 3.33E-06 | #DIV/0! |
| ENSG00000100453 | <b>GZMB</b>   | 1.19   | 0.00    | 0.00   | 0.00E+00 | #DIV/0! | 0.35   | 0.03    | 0.08   | 0.00E+00 | #DIV/0! |
| ENSG00000113088 | <b>GZMK</b>   | 1.87   | 0.00    | 0.00   | 1.57E-06 | #DIV/0! | 0.84   | 0.03    | 0.03   | 6.28E-06 | 1.2     |
| ENSG00000101076 | <b>HNF4A</b>  | 100.42 | 0.57    | 0.01   | 3.22E-08 | 92.0    | 93.59  | 32.79   | 0.35   | 4.00E-04 | 553.1   |
| ENSG00000116983 | <b>HPCAL4</b> | 0.01   | 0.14    | 9.19   | 5.40E-03 | 0.1     | 0.00   | 1.14    | 270.77 | NS       | 1.4     |



|                 |                |        |        |       |          |         |        |        |        |          |       |
|-----------------|----------------|--------|--------|-------|----------|---------|--------|--------|--------|----------|-------|
| ENSG00000204389 | <b>HSPA1A</b>  | 16.31  | 72.22  | 4.43  | NS       | 2.2     | 39.60  | 71.08  | 1.79   | NS       | 2.2   |
| ENSG00000044574 | <b>HSPA5</b>   | 62.71  | 682.50 | 10.88 | NS       | 1.4     | 125.79 | 616.12 | 4.90   | NS       | 1.1   |
| ENSG00000136244 | <b>IL6</b>     | 0.04   | 0.32   | 8.95  | NS       | 0.5     | 0.01   | 0.74   | 73.22  | NS       | 2.0   |
| ENSG00000125347 | <b>IRF1</b>    | 6.24   | 27.62  | 4.42  | NS       | 14.9    | 4.19   | 12.01  | 2.87   | NS       | 5.6   |
| ENSG00000168310 | <b>IRF2</b>    | 12.32  | 12.93  | 1.05  | 1.00E-04 | 1.4     | 10.69  | 9.15   | 0.86   | 0.00E+00 | 1.1   |
| ENSG00000185507 | <b>IRF7</b>    | 6.51   | 9.20   | 1.41  | NS       | 4.3     | 9.80   | 12.07  | 1.23   | NS       | 3.7   |
| ENSG00000169896 | <b>ITGAM</b>   | 0.89   | 0.01   | 0.01  | 6.04E-06 | 0.0     | 0.47   | 0.05   | 0.10   | 0.00E+00 | 0.1   |
| ENSG00000055957 | <b>ITIH1</b>   | 727.41 | 0.01   | 0.00  | 1.29E-09 | #DIV/0! | 764.58 | 0.27   | 0.00   | 3.43E-09 | 1.3   |
| ENSG00000096968 | <b>JAK2</b>    | 1.49   | 14.39  | 9.67  | NS       | 5.5     | 1.02   | 13.49  | 13.20  | NS       | 5.9   |
| ENSG00000120049 | <b>KCNIP2</b>  | 0.96   | 1.27   | 1.31  | 3.70E-03 | 0.5     | 0.79   | 1.63   | 2.05   | NS       | 0.6   |
| ENSG00000115041 | <b>KCNIP3</b>  | 0.40   | 0.11   | 0.27  | 0.00E+00 | 0.2     | 0.25   | 0.55   | 2.18   | NS       | 0.9   |
| ENSG00000068796 | <b>KIF2A</b>   | 0.96   | 58.43  | 61.10 | 5.00E-04 | 1.1     | 0.64   | 64.90  | 101.05 | 5.00E-04 | 1.1   |
| ENSG00000167748 | <b>KLK1</b>    | 0.03   | 0.08   | 2.57  | NS       | 0.0     | 0.01   | 0.05   | 5.92   | NS       | 0.0   |
| ENSG00000164344 | <b>KLKB1</b>   | 164.07 | 0.32   | 0.00  | 1.33E-09 | 0.0     | 170.45 | 0.27   | 0.00   | 5.59E-09 | 0.0   |
| ENSG00000115919 | <b>KYNU</b>    | 3.61   | 0.21   | 0.06  | 6.13E-07 | 5.7     | 3.72   | 0.76   | 0.20   | 0.00E+00 | 23.9  |
| ENSG00000154655 | <b>L3MBTL4</b> | 2.97   | 2.49   | 0.84  | 0.00E+00 | 2.1     | 2.79   | 1.36   | 0.49   | 0.00E+00 | 1.6   |
| ENSG00000005893 | <b>LAMP2</b>   | 43.74  | 113.26 | 2.59  | NS       | 4.8     | 36.59  | 137.60 | 3.76   | NS       | 6.1   |
| ENSG00000002549 | <b>LAP3</b>    | 40.50  | 56.58  | 1.40  | 3.00E-04 | 1.4     | 38.80  | 50.01  | 1.29   | 3.00E-04 | 1.1   |
| ENSG00000182866 | <b>LCK</b>     | 2.38   | 0.09   | 0.04  | 0.00E+00 | 0.0     | 0.66   | 0.05   | 0.08   | 0.00E+00 | 0.0   |
| ENSG00000043462 | <b>LCP2</b>    | 2.25   | 0.03   | 0.01  | 0.00E+00 | 0.1     | 0.80   | 0.06   | 0.07   | 0.00E+00 | 0.3   |
| ENSG00000131981 | <b>LGALS3</b>  | 4.18   | 85.85  | 20.56 | 1.40E-03 | 19.9    | 2.04   | 97.56  | 47.71  | 5.90E-03 | 17.7  |
| ENSG00000100600 | <b>LGMN</b>    | 22.16  | 64.88  | 2.93  | NS       | 1.7     | 19.00  | 74.32  | 3.91   | NS       | 1.3   |
| ENSG00000107798 | <b>LIPA</b>    | 23.02  | 20.57  | 0.89  | 3.00E-03 | 0.6     | 15.39  | 33.20  | 2.16   | 8.80E-03 | 0.6   |
| ENSG00000123384 | <b>LRP1</b>    | 44.14  | 76.99  | 1.74  | 9.00E-04 | 1.7     | 39.32  | 111.59 | 2.84   | 9.60E-03 | 2.5   |
| ENSG00000111144 | <b>LTA4H</b>   | 7.78   | 35.05  | 4.51  | NS       | 0.5     | 6.12   | 35.92  | 5.86   | NS       | 0.5   |
| ENSG00000012223 | <b>LTF</b>     | 0.34   | 0.04   | 0.13  | 6.00E-04 | 0.1     | 0.26   | 0.10   | 0.38   | 2.60E-03 | 0.2   |
| ENSG00000254087 | <b>LYN</b>     | 4.58   | 56.45  | 12.33 | NS       | 0.9     | 3.02   | 34.54  | 11.44  | NS       | 0.6   |
| ENSG00000185022 | <b>MAFF</b>    | 0.32   | 27.25  | 84.69 | 1.00E-04 | 8.6     | 0.14   | 16.31  | 115.54 | 3.00E-04 | 6.8   |
| ENSG00000065833 | <b>ME1</b>     | 3.30   | 38.69  | 11.72 | 2.50E-03 | 5.0     | 2.47   | 78.78  | 31.91  | 3.00E-04 | 10.6  |
| ENSG00000157227 | <b>MMP14</b>   | 5.72   | 525.09 | 91.87 | 3.78E-06 | 9.9     | 3.10   | 498.85 | 161.03 | 7.19E-06 | 6.3   |
| ENSG00000102996 | <b>MMP15</b>   | 19.50  | 56.58  | 2.90  | NS       | 1.6     | 20.52  | 55.21  | 2.69   | NS       | 1.6   |
| ENSG00000204301 | <b>NOTCH4</b>  | 2.88   | 0.15   | 0.05  | 1.05E-06 | 0.5     | 1.58   | 0.22   | 0.14   | 2.19E-06 | 0.6   |
| ENSG00000173391 | <b>OLR1</b>    | 0.14   | 0.24   | 1.77  | NS       | #DIV/0! | 0.03   | 5.54   | 162.38 | NS       | 523.0 |

|                 |         |        |         |        |          |      |        |         |         |          |         |
|-----------------|---------|--------|---------|--------|----------|------|--------|---------|---------|----------|---------|
| ENSG00000186472 | PCLO    | 0.04   | 7.58    | 202.80 | 4.00E-04 | 3.6  | 0.00   | 5.46    | 1196.81 | 8.00E-04 | 2.6     |
| ENSG00000169174 | PCSK9   | 14.62  | 0.02    | 0.00   | 5.67E-08 | 0.0  | 9.48   | 0.23    | 0.02    | 4.88E-07 | 0.0     |
| ENSG00000100311 | PDGFB   | 1.88   | 59.13   | 31.41  | 2.00E-04 | 10.2 | 2.61   | 30.43   | 11.65   | NS       | 9.1     |
| ENSG00000164951 | PDP1    | 0.77   | 37.92   | 49.44  | 1.00E-04 | 1.4  | 0.76   | 29.44   | 38.57   | 2.00E-04 | 1.2     |
| ENSG00000108518 | PFN1    | 193.15 | 1633.35 | 8.46   | 5.40E-03 | 1.4  | 197.08 | 1234.39 | 6.26    | NS       | 1.0     |
| ENSG00000102174 | PHEX    | 0.00   | 0.88    | 230.66 | 3.40E-03 | 3.3  | 0.00   | 0.41    | 124.86  | NS       | 2.4     |
| ENSG00000121879 | PIK3CA  | 2.21   | 20.34   | 9.20   | NS       | 3.3  | 2.22   | 17.71   | 7.99    | NS       | 2.8     |
| ENSG00000105851 | PIK3CG  | 0.23   | 0.00    | 0.00   | 2.00E-04 | 0.0  | 0.09   | 0.00    | 0.00    | 1.00E-04 | #DIV/0! |
| ENSG00000141506 | PIK3R5  | 1.07   | 0.04    | 0.04   | 5.95E-06 | 0.0  | 0.48   | 0.13    | 0.28    | 0.00E+00 | 0.0     |
| ENSG00000137193 | PIM1    | 5.04   | 82.13   | 16.31  | 4.00E-04 | 1.3  | 6.22   | 120.98  | 19.44   | 3.00E-04 | 2.2     |
| ENSG00000116711 | PLA2G4A | 0.40   | 2.55    | 6.39   | NS       | 1.1  | 0.33   | 12.11   | 37.11   | NS       | 5.6     |
| ENSG00000146070 | PLA2G7  | 0.87   | 5.06    | 5.84   | NS       | 1.3  | 0.57   | 1.83    | 3.22    | NS       | 0.3     |
| ENSG00000104368 | PLAT    | 1.41   | 7.52    | 5.33   | NS       | 2.8  | 0.31   | 5.01    | 16.05   | NS       | 0.8     |
| ENSG00000011422 | PLAUR   | 0.31   | 45.46   | 148.18 | 1.00E-04 | 6.4  | 0.08   | 10.44   | 123.99  | NS       | 1.0     |
| ENSG00000115956 | PLEK    | 3.12   | 0.06    | 0.02   | 1.00E-04 | 6.0  | 1.06   | 0.08    | 0.07    | 1.00E-04 | 1.9     |
| ENSG00000122194 | PLG     | 531.41 | 0.15    | 0.00   | 6.04E-09 | 7.3  | 580.42 | 0.29    | 0.00    | 2.06E-08 | 1.7     |
| ENSG00000188313 | PLSCR1  | 3.74   | 67.71   | 18.10  | NS       | 3.9  | 3.26   | 50.38   | 15.44   | NS       | 2.7     |
| ENSG00000104695 | PPP2CB  | 15.06  | 127.15  | 8.44   | NS       | 2.6  | 13.24  | 121.50  | 9.18    | NS       | 2.4     |
| ENSG00000149923 | PPP4C   | 27.38  | 120.32  | 4.39   | NS       | 1.4  | 25.84  | 112.76  | 4.36    | NS       | 1.3     |
| ENSG00000137509 | PRCP    | 7.50   | 13.95   | 1.86   | 8.70E-03 | 0.7  | 5.50   | 16.69   | 3.04    | NS       | 0.8     |
| ENSG00000110851 | PRDM4   | 3.05   | 54.33   | 17.83  | 3.00E-04 | 3.1  | 2.61   | 51.57   | 19.78   | 9.00E-04 | 3.2     |
| ENSG00000085377 | PREP    | 6.19   | 38.87   | 6.28   | NS       | 0.7  | 5.49   | 37.05   | 6.75    | NS       | 0.6     |
| ENSG00000163932 | PRKCD   | 4.08   | 39.89   | 9.77   | 2.60E-03 | 1.7  | 3.13   | 29.98   | 9.57    | NS       | 1.3     |
| ENSG00000010438 | PRSS3   | 1.82   | 0.05    | 0.03   | 3.00E-04 | 0.1  | 0.35   | 0.29    | 0.82    | 1.10E-03 | 0.7     |
| ENSG00000178226 | PRSS36  | 0.77   | 0.22    | 0.29   | 0.00E+00 | 0.5  | 1.03   | 0.20    | 0.19    | 0.00E+00 | 0.5     |
| ENSG00000080815 | PSEN1   | 5.02   | 44.54   | 8.88   | 8.70E-03 | 2.8  | 4.04   | 56.55   | 13.99   | 7.30E-03 | 2.6     |
| ENSG00000240065 | PSMB9   | 4.12   | 0.74    | 0.18   | 6.12E-06 | 0.6  | 2.76   | 0.22    | 0.08    | 0.00E+00 | 0.4     |
| ENSG00000183155 | RAB1F   | 3.09   | 23.29   | 7.53   | NS       | 2.0  | 3.68   | 28.95   | 7.86    | NS       | 2.9     |
| ENSG00000132155 | RAF1    | 14.97  | 41.14   | 2.75   | 3.70E-03 | 0.8  | 16.14  | 50.00   | 3.10    | NS       | 1.0     |
| ENSG00000172575 | RASGRP1 | 0.36   | 1.62    | 4.50   | NS       | 1.0  | 0.06   | 3.83    | 62.17   | NS       | 2.0     |
| ENSG00000173653 | RCE1    | 3.07   | 27.72   | 9.02   | 5.10E-03 | 1.2  | 2.92   | 29.77   | 10.18   | 7.20E-03 | 1.3     |
| ENSG00000177105 | RHOG    | 9.23   | 52.91   | 5.73   | NS       | 1.6  | 7.41   | 50.54   | 6.82    | NS       | 1.8     |
| ENSG00000063978 | RNF4    | 4.34   | 35.57   | 8.20   | 6.80E-03 | 0.8  | 3.97   | 41.59   | 10.48   | NS       | 0.9     |

|                 |                 |         |        |         |          |         |         |        |        |          |         |
|-----------------|-----------------|---------|--------|---------|----------|---------|---------|--------|--------|----------|---------|
| ENSG00000189171 | <b>SI00A13</b>  | 13.43   | 128.35 | 9.56    | 2.60E-03 | 5.3     | 6.82    | 107.30 | 15.72  | NS       | 3.9     |
| ENSG00000163220 | <b>SI00A9</b>   | 6.56    | 114.91 | 17.52   | NS       | 955.6   | 2.82    | 77.74  | 27.57  | NS       | 1385.4  |
| ENSG00000104112 | <b>SCG3</b>     | 0.01    | 11.83  | 1606.74 | 7.94E-07 | 0.2     | 0.02    | 15.16  | 803.11 | 1.73E-06 | 0.3     |
| ENSG00000197249 | <b>SERPINA1</b> | 3218.49 | 2.16   | 0.00    | 2.41E-08 | 28.9    | 2099.11 | 11.57  | 0.01   | 6.39E-07 | 23.5    |
| ENSG00000197632 | <b>SERPINB2</b> | 0.01    | 0.98   | 110.63  | 2.78E-06 | 2.1     | 0.01    | 1.56   | 205.10 | NS       | #DIV/0! |
| ENSG00000117601 | <b>SERPINC1</b> | 2139.15 | 0.79   | 0.00    | 1.82E-09 | #DIV/0! | 2028.29 | 11.99  | 0.01   | 5.63E-07 | 20.7    |
| ENSG00000106366 | <b>SERPINE1</b> | 6.63    | 623.82 | 94.12   | 2.00E-04 | 70.5    | 17.41   | 294.22 | 16.90  | 3.80E-03 | 30.8    |
| ENSG00000149131 | <b>SERPING1</b> | 1068.32 | 133.31 | 0.12    | 1.16E-06 | 4.3     | 759.02  | 93.00  | 0.12   | 0.00E+00 | 2.4     |
| ENSG00000111252 | <b>SH2B3</b>    | 7.34    | 18.39  | 2.50    | NS       | 0.6     | 5.62    | 16.72  | 2.98   | NS       | 0.6     |
| ENSG00000077463 | <b>SIRT6</b>    | 4.66    | 21.64  | 4.64    | NS       | 1.8     | 4.05    | 21.69  | 5.36   | NS       | 1.7     |
| ENSG00000107742 | <b>SPOCK2</b>   | 1.29    | 1.17   | 0.91    | 3.00E-03 | 1.2     | 0.52    | 3.36   | 6.48   | NS       | 4.5     |
| ENSG00000197122 | <b>SRC</b>      | 2.40    | 75.51  | 31.40   | 0.00E+00 | 4.5     | 1.41    | 65.12  | 46.21  | 1.00E-04 | 3.1     |
| ENSG00000103496 | <b>STX4</b>     | 12.60   | 19.85  | 1.58    | NS       | 1.2     | 12.11   | 19.95  | 1.65   | NS       | 1.2     |
| ENSG00000105825 | <b>TFPI2</b>    | 0.44    | 84.87  | 192.84  | NS       | 9.0     | 0.35    | 20.34  | 57.72  | NS       | 2.2     |
| ENSG00000102265 | <b>TIMP1</b>    | 50.91   | 148.58 | 2.92    | NS       | 2.8     | 17.47   | 146.55 | 8.39   | NS       | 2.6     |
| ENSG00000035862 | <b>TIMP2</b>    | 11.84   | 80.83  | 6.83    | NS       | 3.2     | 4.89    | 87.12  | 17.81  | NS       | 3.1     |
| ENSG00000187045 | <b>TMPRSS6</b>  | 130.48  | 0.11   | 0.00    | 1.77E-07 | 3.4     | 135.29  | 0.84   | 0.01   | 1.80E-07 | 10.4    |
| ENSG00000118503 | <b>TNFAIP3</b>  | 4.21    | 21.66  | 5.14    | NS       | 5.2     | 4.34    | 16.37  | 3.77   | NS       | 7.1     |
| ENSG00000101557 | <b>USP14</b>    | 7.87    | 78.54  | 9.98    | 3.90E-03 | 1.1     | 8.76    | 85.26  | 9.73   | 7.50E-03 | 1.0     |
| ENSG00000135655 | <b>USP15</b>    | 4.69    | 9.79   | 2.09    | 7.00E-04 | 1.6     | 5.24    | 11.03  | 2.10   | 1.90E-03 | 1.6     |
| ENSG00000156256 | <b>USP16</b>    | 6.72    | 23.12  | 3.44    | NS       | 1.2     | 5.72    | 21.92  | 3.83   | NS       | 1.2     |
| ENSG00000138592 | <b>USP8</b>     | 2.01    | 14.30  | 7.13    | NS       | 1.3     | 2.14    | 13.98  | 6.53   | NS       | 1.2     |
| ENSG00000175073 | <b>VCIPI1</b>   | 1.99    | 17.88  | 8.98    | NS       | 1.8     | 2.09    | 14.44  | 6.92   | NS       | 1.6     |
| ENSG00000015285 | <b>WAS</b>      | 4.30    | 0.80   | 0.19    | 1.00E-04 | 2.2     | 1.46    | 1.16   | 0.79   | 1.00E-04 | 2.0     |
| ENSG00000108039 | <b>XPNPEP1</b>  | 4.50    | 49.84  | 11.08   | 1.00E-03 | 2.0     | 3.64    | 45.85  | 12.59  | 5.90E-03 | 1.5     |
| ENSG00000148516 | <b>ZEB1</b>     | 2.57    | 2.74   | 1.06    | 1.00E-03 | 3.5     | 1.86    | 5.86   | 3.16   | NS       | 5.6     |
| ENSG00000169946 | <b>ZFPM2</b>    | 0.35    | 0.27   | 0.80    | 4.60E-03 | 2.7     | 0.17    | 3.11   | 18.09  | NS       | 26.1    |

- a.** Genes with equal or greater expression in Li-HLCs compared to parental liver highlighted in black.  
**b.** Genes induced during the differentiation (Li-HLCs/Li-iPSCs > 1) highlighted in grey.
