# Supplementary material for: Liver biopsy derived induced pluripotent stem cells provide unlimited supply for the generation of hepatocyte-like cells
Source: PubMed Central journal article supplement (PMC6715171; doi:10.1371/journal.pone.0221762), 2019-08-29
Supplement: pone.0221762.s015.pdf [file pone.0221762.s015.pdf]

**S8 Table.** Gene expression comparison for 27 liver-specific transcription factors between Li-HLCs and parental livers.

| Ensembl ID      | Gene symbol    | Liver              | C101               |                          |                      | C496               |                          |                      |
|-----------------|----------------|--------------------|--------------------|--------------------------|----------------------|--------------------|--------------------------|----------------------|
|                 |                | Expr. <sup>a</sup> | Expr. <sup>a</sup> | Fold change <sup>b</sup> | p-value <sup>c</sup> | Expr. <sup>a</sup> | Fold change <sup>b</sup> | p-value <sup>c</sup> |
| ENSG00000111206 | <b>FOXM1</b>   | 0.22               | 45.14              | 204.49                   | 0.00E+00             | 62.12              | 281.4                    | 0.00E+00             |
| ENSG00000177606 | <b>JUN</b>     | 4.11               | 138.65             | 33.76                    | 1.00E-04             | 97.94              | 23.8                     | 6.00E-04             |
| ENSG00000164379 | <b>FOXQ1</b>   | 0.07               | 1.21               | 18.34                    | 3.00E-04             | 2.92               | 44.2                     | 0.00E+00             |
| ENSG00000008083 | <b>JARID2</b>  | 1.78               | 29.81              | 16.72                    | 9.00E-04             | 34.39              | 19.3                     | 1.00E-03             |
| ENSG00000178919 | <b>FOXE1</b>   | 0.01               | 0.08               | 12.06                    | 2.30E-03             | 0.09               | 13.8                     | N.S.                 |
| ENSG00000141448 | <b>GATA6</b>   | 3.39               | 17.06              | 5.04                     | N.S.                 | 65.46              | 19.3                     | N.S.                 |
| ENSG00000273611 | <b>ZNHIT3</b>  | 1.89               | 8.74               | 4.63                     | N.S.                 | 9.81               | 5.2                      | N.S.                 |
| ENSG00000173039 | <b>RELA</b>    | 12.64              | 47.48              | 3.76                     | N.S.                 | 35.97              | 2.8                      | N.S.                 |
| ENSG00000130700 | <b>GATA5</b>   | 0.22               | 0.44               | 1.98                     | 8.00E-03             | 2.92               | 13.1                     | 1.40E-03             |
| ENSG00000132570 | <b>PCBD2</b>   | 3.15               | 4.30               | 1.37                     | 7.00E-04             | 4.14               | 1.3                      | 7.00E-04             |
| ENSG00000100219 | <b>XBP1</b>    | 225.06             | 298.86             | 1.33                     | 1.00E-04             | 269.89             | 1.2                      | 1.00E-04             |
| ENSG00000103241 | <b>FOXF1</b>   | 0.82               | 0.20               | <b>0.24</b>              | 1.30E-03             | 1.01               | 1.2                      | N.S.                 |
| ENSG00000164749 | <b>HNF4G</b>   | 4.19               | 0.52               | <b>0.13</b>              | 1.92E-06             | 2.71               | <b>0.6</b>               | 4.00E-04             |
| ENSG00000119547 | <b>ONECUT2</b> | 4.81               | 0.44               | <b>0.09</b>              | 2.43E-06             | 1.32               | <b>0.3</b>               | 1.00E-04             |
| ENSG00000129514 | <b>FOXA1</b>   | 13.54              | 1.20               | <b>0.09</b>              | 2.45E-06             | 16.52              | 1.2                      | 2.50E-03             |
| ENSG00000164736 | <b>SOX17</b>   | 0.42               | 0.03               | <b>0.08</b>              | 4.57E-06             | 16.72              | 39.7                     | N.S.                 |
| ENSG00000170608 | <b>FOXA3</b>   | 47.92              | 3.49               | <b>0.07</b>              | 1.63E-06             | 17.85              | <b>0.4</b>               | 3.00E-04             |
| ENSG00000117707 | <b>PROX1</b>   | 25.43              | 1.77               | <b>0.07</b>              | 4.58E-06             | 3.76               | <b>0.1</b>               | 0.00E+00             |
| ENSG00000169856 | <b>ONECUT1</b> | 1.32               | 0.07               | <b>0.05</b>              | 3.00E-04             | 0.19               | <b>0.1</b>               | 6.00E-04             |
| ENSG00000245848 | <b>CEBPA</b>   | 139.75             | 6.29               | <b>0.05</b>              | 2.90E-07             | 20.74              | <b>0.1</b>               | 1.56E-06             |
| ENSG00000136574 | <b>GATA4</b>   | 8.21               | 0.30               | <b>0.04</b>              | 5.69E-06             | 32.07              | 3.9                      | N.S.                 |
| ENSG00000275410 | <b>HNF1B</b>   | 2.22               | 0.06               | <b>0.03</b>              | 9.24E-07             | 10.59              | 4.8                      | N.S.                 |
| ENSG00000136630 | <b>HLX</b>     | 5.59               | 0.10               | <b>0.02</b>              | 1.44E-08             | 0.24               | <b>0.0</b>               | 7.19E-08             |
| ENSG00000125798 | <b>FOXA2</b>   | 13.77              | 0.12               | <b>0.01</b>              | 3.13E-07             | 28.47              | 2.1                      | N.S.                 |
| ENSG00000101076 | <b>HNF4A</b>   | 97.01              | 0.57               | <b>0.01</b>              | 3.22E-08             | 32.79              | <b>0.3</b>               | 4.00E-04             |
| ENSG00000152804 | <b>HHEX</b>    | 46.58              | 0.18               | <b>0.00</b>              | 4.05E-08             | 0.50               | <b>0.0</b>               | 4.38E-06             |
| ENSG00000135100 | <b>HNF1A</b>   | 13.94              | 0.04               | <b>0.00</b>              | 2.68E-06             | 1.34               | <b>0.1</b>               | 0.00E+00             |

**a.:** Gene expression shown as averaged Transcript Per Million (TPM)

**b.:** Fold change calculated between patient Li-HLCs and parental liver

**c.:** p-value calculated by a Limma contrast between patient Li-HLCs and grouped parental livers.
