# Supplementary material for: Liver biopsy derived induced pluripotent stem cells provide unlimited supply for the generation of hepatocyte-like cells
Source: PubMed Central journal article supplement (PMC6715171; doi:10.1371/journal.pone.0221762), 2019-08-29
Supplement: pone.0221762.s016.pdf [file pone.0221762.s016.pdf]

**S9 Table.** Genes identified by gene and sample clustering as cluster 2.

| Ensembl ID      | Gene symbol     | Liver              | Li-HLC             |                          | Fi-HLC             |                          |
|-----------------|-----------------|--------------------|--------------------|--------------------------|--------------------|--------------------------|
|                 |                 | Expr. <sup>a</sup> | Expr. <sup>a</sup> | Fold change <sup>b</sup> | Expr. <sup>a</sup> | Fold change <sup>b</sup> |
| ENSG00000276850 | #N/A            | 0.23               | 27.98              | 121.70                   | 20.26              | 88.14                    |
| ENSG00000120457 | <b>KCNJ5</b>    | 0.19               | 21.29              | 114.47                   | 2.30               | 12.39                    |
| ENSG00000171631 | <b>P2RY6</b>    | 0.36               | 95.86              | 263.06                   | 11.12              | 30.51                    |
| ENSG00000214049 | <b>UCA1</b>     | 0.17               | 89.20              | 511.77                   | 0.08               | 0.47                     |
| ENSG00000203857 | <b>HSD3B1</b>   | 0.33               | 120.53             | 360.16                   | 18.65              | 55.74                    |
| ENSG00000135346 | <b>CGA</b>      | 0.09               | 303.54             | 3494.28                  | 355.73             | 4095.07                  |
| ENSG00000088726 | <b>TMEM40</b>   | 0.03               | 58.84              | 1785.28                  | 4.04               | 122.48                   |
| ENSG00000137869 | <b>CYP19A1</b>  | 0.01               | 12.45              | 2007.72                  | 7.77               | 1252.93                  |
| ENSG00000102243 | <b>VGLL1</b>    | 0.04               | 102.81             | 2555.71                  | 12.54              | 311.82                   |
| ENSG00000163993 | <b>S100P</b>    | 0.15               | 77.18              | 521.20                   | 31.24              | 210.95                   |
| ENSG00000138271 | <b>GPR87</b>    | 0.03               | 92.51              | 3042.08                  | 16.92              | 556.51                   |
| ENSG00000113196 | <b>HAND1</b>    | 0.01               | 254.08             | 18034.88                 | 379.99             | 26971.94                 |
| ENSG00000128422 | <b>KRT17</b>    | 0.03               | 50.83              | 1949.42                  | 12.85              | 492.70                   |
| ENSG00000140873 | <b>ADAMTS18</b> | 0.01               | 41.42              | 7922.03                  | 11.92              | 2279.03                  |
| ENSG00000115221 | <b>ITGB6</b>    | 0.04               | 229.31             | 5782.37                  | 10.88              | 274.34                   |
| ENSG00000164764 | <b>SBSPON</b>   | 0.08               | 7.09               | 91.49                    | 22.55              | 290.87                   |
| ENSG00000169435 | <b>RASSF6</b>   | 0.19               | 8.03               | 43.04                    | 2.56               | 13.72                    |
| ENSG00000168702 | <b>LRP1B</b>    | 0.26               | 1.22               | 4.77                     | 2.97               | 11.63                    |
| ENSG00000108576 | <b>SLC6A4</b>   | 0.03               | 3.68               | 143.78                   | 2.29               | 89.42                    |
| ENSG00000144452 | <b>ABCA12</b>   | 0.01               | 5.03               | 746.16                   | 1.40               | 207.58                   |
| ENSG00000197616 | <b>MYH6</b>     | 0.01               | 13.10              | 1162.43                  | 5.51               | 489.31                   |
| ENSG00000179148 | <b>ALOXE3</b>   | 0.01               | 3.97               | 609.07                   | 0.64               | 98.84                    |
| ENSG00000180318 | <b>ALX1</b>     | 0.02               | 10.01              | 590.62                   | 3.84               | 226.46                   |
| ENSG00000242950 | <b>ERVW-1</b>   | 0.01               | 5.03               | 716.59                   | 5.31               | 756.55                   |
| ENSG00000169550 | <b>MUC15</b>    | 0.01               | 6.38               | 873.80                   | 8.05               | 1103.04                  |
| ENSG00000280241 | #N/A            | 0.04               | 28.04              | 759.26                   | 2.32               | 62.78                    |
| ENSG00000171462 | <b>DLK2</b>     | 0.01               | 16.66              | 1521.67                  | 4.10               | 374.39                   |
| ENSG00000016082 | <b>ISL1</b>     | 0.01               | 13.56              | 1596.47                  | 11.94              | 1405.25                  |
| ENSG00000064195 | <b>DLX3</b>     | 0.01               | 13.88              | 1538.61                  | 6.10               | 676.62                   |
| ENSG00000069812 | <b>HES2</b>     | 0.00               | 6.00               | 1325.33                  | 0.92               | 203.76                   |
| ENSG00000108932 | <b>SLC16A6</b>  | 0.28               | 11.98              | 43.15                    | 5.63               | 20.29                    |
| ENSG00000012124 | <b>CD22</b>     | 0.34               | 8.58               | 25.46                    | 1.52               | 4.51                     |
| ENSG00000272405 | #N/A            | 0.03               | 14.70              | 442.76                   | 5.55               | 167.27                   |
| ENSG00000143217 | <b>NECTIN4</b>  | 0.03               | 17.71              | 593.97                   | 7.68               | 257.74                   |
| ENSG00000166546 | <b>BEAN1</b>    | 0.06               | 3.30               | 58.83                    | 0.70               | 12.55                    |
| ENSG00000120149 | <b>MSX2</b>     | 0.03               | 83.05              | 2505.73                  | 82.12              | 2477.81                  |
| ENSG00000125872 | <b>LRRN4</b>    | 0.03               | 65.32              | 2448.08                  | 30.93              | 1159.28                  |
| ENSG00000173376 | <b>NDNF</b>     | 0.24               | 33.95              | 139.64                   | 15.34              | 63.09                    |
| ENSG00000175318 | <b>GRAMD2</b>   | 0.01               | 39.12              | 3147.25                  | 5.87               | 472.39                   |
| ENSG00000145681 | <b>HAPLN1</b>   | 0.01               | 106.72             | 10598.24                 | 85.78              | 8518.87                  |
| ENSG00000158270 | <b>COLEC12</b>  | 0.10               | 66.19              | 633.16                   | 85.10              | 814.09                   |
| ENSG00000224940 | <b>PRRT4</b>    | 0.08               | 17.90              | 228.13                   | 3.75               | 47.84                    |
| ENSG00000223573 | <b>TINCR</b>    | 0.07               | 14.23              | 213.46                   | 6.11               | 91.72                    |
| ENSG00000133519 | <b>ZDHHC8P1</b> | 0.10               | 10.24              | 103.92                   | 12.65              | 128.41                   |
| ENSG00000276971 | #N/A            | 0.20               | 46.54              | 231.65                   | 15.05              | 74.92                    |
| ENSG00000005001 | <b>PRSS22</b>   | 0.24               | 40.58              | 171.49                   | 15.12              | 63.92                    |
| ENSG00000150556 | <b>LYPD6B</b>   | 0.18               | 38.48              | 219.72                   | 11.88              | 67.86                    |
| ENSG00000167874 | <b>TMEM88</b>   | 1.27               | 193.34             | 152.78                   | 465.63             | 367.95                   |
| ENSG00000132854 | <b>KANK4</b>    | 2.30               | 65.97              | 28.72                    | 19.07              | 8.30                     |
| ENSG00000183018 | <b>SPNS2</b>    | 4.02               | 67.57              | 16.81                    | 14.14              | 3.52                     |
| ENSG00000107485 | <b>GATA3</b>    | 0.56               | 196.42             | 349.51                   | 45.20              | 80.43                    |
| ENSG00000165125 | <b>TRPV6</b>    | 0.16               | 25.33              | 161.06                   | 7.46               | 47.44                    |
| ENSG00000134258 | <b>VTCN1</b>    | 0.35               | 473.10             | 1360.37                  | 122.62             | 352.58                   |
| ENSG00000137203 | <b>TFAP2A</b>   | 0.03               | 53.68              | 2008.17                  | 16.93              | 633.25                   |
| ENSG00000181634 | <b>TNFSF15</b>  | 0.10               | 73.81              | 731.51                   | 4.03               | 39.94                    |
| ENSG00000148053 | <b>NTRK2</b>    | 0.25               | 32.29              | 129.21                   | 13.50              | 54.03                    |

a.: Gene expression shown as averaged Transcript Per Million (TPM)

b.: Fold change of Li- and Fi-HLCs vs. Liver
