# Supplementary material for: Liver biopsy derived induced pluripotent stem cells provide unlimited supply for the generation of hepatocyte-like cells
Source: PubMed Central journal article supplement (PMC6715171; doi:10.1371/journal.pone.0221762), 2019-08-29
Supplement: pone.0221762.s017.pdf [file pone.0221762.s017.pdf]

**S10 Table.** GO gene sets significantly enriched in the gene with a divergent expression compared to all other samples analyzed (Figure 8).

| Gene Set Name                                                           | # Genes <sup>a</sup> | % of Gene set <sup>b</sup> | p-value  | FDR q-value |
|-------------------------------------------------------------------------|----------------------|----------------------------|----------|-------------|
| GO ORGAN MORPHOGENESIS                                                  | 10                   | 1.2%                       | 1.39E-08 | 6.25E-05    |
| GO TISSUE DEVELOPMENT                                                   | 10                   | 0.7%                       | 3.13E-06 | 1.40E-03    |
| GO POSITIVE REGULATION OF GENE EXPRESSION                               | 10                   | 0.6%                       | 1.00E-05 | 2.49E-03    |
| GO REGULATION OF MULTICELLULAR ORGANISMAL DEVELOPMENT                   | 9                    | 0.5%                       | 5.09E-05 | 7.87E-03    |
| GO REGULATION OF TRANSCRIPTION FROM RNA POLYMERASE II PROMOTER          | 9                    | 0.5%                       | 8.37E-05 | 9.88E-03    |
| GO CELLULAR RESPONSE TO ORGANIC SUBSTANCE                               | 9                    | 0.5%                       | 1.09E-04 | 1.13E-02    |
| GO TISSUE MORPHOGENESIS                                                 | 8                    | 1.5%                       | 7.80E-08 | 1.28E-04    |
| GO EPITHELIUM DEVELOPMENT                                               | 8                    | 0.9%                       | 5.65E-06 | 1.95E-03    |
| GO ANATOMICAL STRUCTURE FORMATION INVOLVED IN MORPHOGENESIS             | 8                    | 0.8%                       | 6.20E-06 | 1.99E-03    |
| GO POSITIVE REGULATION OF MULTICELLULAR ORGANISMAL PROCESS              | 8                    | 0.6%                       | 9.05E-05 | 1.04E-02    |
| GO TRANSCRIPTION FROM RNA POLYMERASE II PROMOTER                        | 7                    | 1.0%                       | 9.83E-06 | 2.49E-03    |
| GO CIRCULATORY SYSTEM DEVELOPMENT                                       | 7                    | 0.9%                       | 1.70E-05 | 3.62E-03    |
| GO EMBRYO DEVELOPMENT                                                   | 7                    | 0.8%                       | 3.79E-05 | 6.53E-03    |
| GO POSITIVE REGULATION OF TRANSCRIPTION FROM RNA POLYMERASE II PROMOTER | 7                    | 0.7%                       | 7.85E-05 | 9.88E-03    |
| GO CELLULAR RESPONSE TO ENDOGENOUS STIMULUS                             | 7                    | 0.7%                       | 8.04E-05 | 9.88E-03    |
| GO MORPHOGENESIS OF AN EPITHELIUM                                       | 6                    | 1.5%                       | 3.77E-06 | 1.54E-03    |
| GO SKELETAL SYSTEM DEVELOPMENT                                          | 6                    | 1.3%                       | 7.87E-06 | 2.21E-03    |
| GO EMBRYO DEVELOPMENT ENDING IN BIRTH OR EGG HATCHING                   | 6                    | 1.1%                       | 2.39E-05 | 4.46E-03    |
| GO NEGATIVE REGULATION OF TRANSCRIPTION FROM RNA POLYMERASE II PROMOTER | 6                    | 0.8%                       | 1.18E-04 | 1.18E-02    |
| GO CARDIAC CHAMBER MORPHOGENESIS                                        | 5                    | 4.8%                       | 8.54E-08 | 1.28E-04    |

- a. Number of significant genes overlapping with the Molecular Signatures Database (MSigDB) GO gene sets
- b. Percentage of the GO gene set represented by the genes in overlap
